# Supplementary material for: Maize ZmBES1/BZR1-3 and -9 Transcription Factors Negatively Regulate Drought Tolerance in Transgenic Arabidopsis
Source: Int J Mol Sci. 2022 May 27;23(11):6025. doi: 10.3390/ijms23116025 (PMC9181540; doi:10.3390/ijms23116025)
Supplement: Supplementary file 1 [file ijms-23-06025-s001.zip › Supplementary Table.xlsx]

## Sheet: Table S1
The common DEGs of ZmBES1/BZR1-3 expressing lines
gene_id	bes1-D	L3-1	log2FoldChange	pvalue	L3-10	log2FoldChange	pvalue	gene_name
AT1G01320	5650.18	8551.09	-0.597832	0.000390368	7350.36	-0.336837	0.0418973	-
AT1G02305	3535.02	5222.59	-0.563002	0.00561376	4749.53	-0.384483	0.0214463	CATHB2
AT1G02610	476.527	631.704	-0.40665	0.0118898	614.151	-0.323105	0.0350873	-
AT1G03090	10564.4	17651.2	-0.74056	0.00522682	15208.8	-0.484925	0.0465749	MCCA
AT1G03110	151.89	94.3206	0.684494	0.035202	99.2484	0.660347	0.0124492	TRM82
AT1G03290	1609.18	2217.69	-0.462702	0.0113099	2190.06	-0.402791	0.0140973	-
AT1G03820	36.8668	9.19693	1.99063	0.0196522	12.4071	1.61015	0.0159305	-
AT1G06137	11.6173	0.342956	4.92729	0.0323933	0.699293	4.13104	0.0451452	-
AT1G11650	5840.94	8103.51	-0.472324	0.00333564	7251.16	-0.269436	0.0395326	RBP45B
AT1G12240	2656.28	4514.84	-0.765173	0.00135482	4109.43	-0.585387	0.00404367	BFRUCT4
AT1G14250	6.52845	27.6855	-2.08848	0.0141651	44.3265	-2.73126	1.18148e-05	APY5
AT1G14550	7.12296	49.252	-2.78946	0.0447831	38.0471	-2.38485	0.0265749	PER5
AT1G18075	57.7333	34.4376	0.74138	0.0430312	33.6962	0.821108	0.0166919	MIR159B
AT1G18270	11396.5	15277.5	-0.422822	0.0326168	16234.5	-0.468503	0.0132914	-
AT1G18330	1837.46	3025.48	-0.719436	0.00875415	3252.29	-0.782667	0.00187237	RVE7
AT1G18830	4.25374	44.086	-3.36891	0.015693	54.7504	-3.6287	0.000154609	SEC31A
AT1G21580	3220.15	4029.97	-0.323596	0.00786527	4199.77	-0.340017	0.00448693	-
AT1G22640	590.861	988.129	-0.741934	0.000508903	851.337	-0.484978	0.0201115	MYB3
AT1G25230	1672.32	2366.2	-0.500812	0.0260858	2570.31	-0.578595	0.00358514	-
AT1G30250	16.0167	44.9382	-1.49126	0.00578613	41.4771	-1.33079	0.0238343	-
AT1G32450	5313.55	1700.28	1.64402	0.00100154	2720.52	1.00349	0.00131018	NPF7.3
AT1G32750	1994.75	2442.13	-0.291909	0.0487353	2557.15	-0.315019	0.0091071	TAF1
AT1G34580	33.7748	67.6582	-1.00598	0.023929	60.2592	-0.789513	0.0434573	STP5
AT1G47510	69.141	164.394	-1.24826	0.0470316	246.256	-1.78717	4.69311e-07	IP5P11
AT1G47670	456.904	282.382	0.694105	0.00217492	347.911	0.434547	0.0386226	AATL1
AT1G51430	619.045	930.46	-0.587659	0.00273585	864.442	-0.439056	0.0112948	-
AT1G52820	166.106	59.0842	1.49375	0.00193677	64.1544	1.41828	0.000128586	-
AT1G54100	14327.8	23596.6	-0.719754	0.0199863	21127.1	-0.519453	0.0330056	ALDH7B4
AT1G55530	1428.31	2320.93	-0.700331	0.00813641	2022.74	-0.460723	0.0464604	-
AT1G58200	1063.64	1482.22	-0.478659	0.0224251	1420.29	-0.375011	0.0443041	MSL3
AT1G59520	673.993	849.993	-0.334612	0.0361287	857.762	-0.305706	0.0461353	CW7
AT1G60470	120.192	35.6022	1.76099	0.0325107	42.9252	1.52392	3.45225e-05	GOLS4
AT1G60970	41.3453	18.1451	1.18976	0.0253429	21.6583	0.982684	0.0341793	-
AT1G64660	7483.47	15751.1	-1.07366	0.00164302	15023.3	-0.964812	0.000575775	MGL
AT1G65590	789.226	995.994	-0.335989	0.0232859	1089.64	-0.422067	0.00874161	HEXO3
AT1G65860	184.432	59.7917	1.62307	0.020589	72.3219	1.4103	0.0153073	FMOGS-OX1
AT1G67980	73.2751	229.7	-1.64772	0.0226645	173.676	-1.20065	0.0368349	CCOAMT
AT1G70160	2511.69	3118.15	-0.31204	0.0433578	3311.48	-0.355427	0.00393069	-
AT1G70680	2.14159	14.1547	-2.71921	0.0195493	11.5558	-2.38195	0.0173875	PXG5
AT1G72880	573.895	711.172	-0.309109	0.0350183	714.801	-0.273333	0.0397377	-
AT1G73600	454.496	192.975	1.2362	0.00842809	254.902	0.889896	0.0256541	-
AT1G75220	2911.68	4137.2	-0.506769	0.0168413	4056.86	-0.436177	0.0224542	-
AT1G75490	155.605	312.631	-1.00577	0.00191126	235.09	-0.553744	0.0446941	DREB2D
AT1G76410	807.039	1259.87	-0.642404	0.048376	1248.69	-0.590355	0.0266721	ATL8
AT1G77210	1339.31	2287.89	-0.77262	0.000309614	2247.33	-0.703918	0.000363933	STP14
AT1G77220	611.281	814.537	-0.413992	0.0192276	822.842	-0.386217	0.0213207	-
AT1G78660	1261.58	1896.21	-0.587731	0.0243619	1848.1	-0.509129	0.00490864	GGH1
AT1G79680	60.4431	166.19	-1.45773	0.0307058	122.007	-0.961305	0.0367805	WAKL10
AT1G79760	79.43	50.2472	0.65925	0.0404446	44.5137	0.877146	0.0119781	DTA4
AT1G80180	4046.13	5910.92	-0.546848	0.00781829	5482.92	-0.397408	0.0377307	-
AT1G80380	5509.14	8273.24	-0.586611	0.0298408	8260.53	-0.542589	0.0152908	GLYK
AT2G01008	4.63984	25.9088	-2.47741	0.0175241	13.6165	-1.51592	0.0478855	-
AT2G01020	85.0853	279.534	-1.71404	1.78019e-07	169.695	-0.948254	0.000714149	-
AT2G01150	293.79	166.712	0.819284	0.00339098	212.215	0.510263	0.0482521	RHA2B
AT2G04550	734.179	980.295	-0.417259	0.0148006	951.315	-0.331887	0.0410476	IBR5
AT2G05642	282.761	164.343	0.782913	0.00586736	182.28	0.678085	0.0128576	-
AT2G14095	7.33219	35.621	-2.27592	0.0406005	37.8599	-2.31956	0.000110098	-
AT2G15780	0.892502	13.9366	-3.94683	0.0407592	9.13571	-3.27318	0.0432695	-
AT2G15830	157.402	282.69	-0.844351	0.00159619	299.807	-0.888683	3.73691e-05	-
AT2G16570	104.043	53.6369	0.954335	0.0187187	57.3866	0.901937	0.00991849	ASE1
AT2G16890	58.1778	24.4456	1.25012	0.00604875	22.4488	1.413	0.0126178	UGT90A1
AT2G17040	56.8131	28.6262	0.988649	0.0183051	28.4476	1.04701	0.0172996	anac036
AT2G18150	156.012	39.6954	1.9737	0.0214938	54.5593	1.55134	0.00434345	PER15
AT2G20740	1006.26	1508.59	-0.584054	0.00309426	1488.92	-0.523352	0.00187552	TOM2AH3
AT2G22660	7423.32	9375.55	-0.336811	0.0404156	10111.9	-0.40373	0.00471729	GRDP1
AT2G22760	2.43921	25.9464	-3.4076	0.0240226	24.6786	-3.2826	0.000856193	BHLH19
AT2G22980	402.343	877.459	-1.12462	3.45565e-06	573.164	-0.469082	0.0298844	SCPL13
AT2G22990	5100.99	10409.8	-1.02911	1.53058e-05	7792.25	-0.570816	0.0134256	SNG1
AT2G24762	441.303	247.903	0.83321	0.000973569	284.877	0.672268	0.00134964	GDU4
AT2G24850	48.35	142.836	-1.56285	0.0246364	229.896	-2.20434	0.0247396	TAT3
AT2G25450	314.225	705.883	-1.16757	0.0396132	678.859	-1.07176	0.00231713	GSL-OH
AT2G25460	140.213	332.184	-1.24352	0.013958	357.749	-1.30917	1.30419e-06	-
AT2G26690	2676.27	3639.17	-0.44346	0.0179385	3519.54	-0.352438	0.032027	NPF6.2
AT2G26750	7.06441	23.4078	-1.72537	0.0198309	21.5311	-1.56192	0.0284526	-
AT2G27389	0.609803	7.34862	-3.57934	0.0318881	9.38165	-3.88859	0.00440539	-
AT2G28290	5528.31	7141.05	-0.369306	0.0177395	7935.3	-0.477902	5.99189e-05	SYD
AT2G29150	1.2048	21.3445	-4.13491	0.011013	16.8898	-3.74168	0.00233729	-
AT2G29200	627.635	467.75	0.424426	0.0405371	462.805	0.48542	0.0169327	APUM1
AT2G29350	140.233	411.672	-1.55326	0.0188033	412.64	-1.50967	0.00437109	SAG13
AT2G29440	33.0151	102.26	-1.63038	0.033688	151.314	-2.15661	1.22299e-07	GSTU6
AT2G29450	1400.88	2484.39	-0.826493	0.00280473	3086.47	-1.09712	4.12626e-06	GSTU5
AT2G29940	85.039	268.276	-1.65617	0.00182142	184.563	-1.07232	0.00528117	ABCG31
AT2G30660	6.12734	62.6177	-3.34935	0.000111103	61.2058	-3.27404	1.30019e-10	-
AT2G31300	216.581	155.007	0.481803	0.0378845	143.253	0.638791	0.0155227	ARPC1B
AT2G31560	203.208	324.192	-0.672976	0.00389717	306.905	-0.553116	0.00323975	-
AT2G31960	5923.9	7399.75	-0.320947	0.0498275	7864.04	-0.366371	0.0117787	CALS2
AT2G35060	1459.41	2108.57	-0.530734	0.00829681	1902.13	-0.338888	0.040546	KUP11
AT2G35350	92.4714	44.2142	1.05905	0.0114947	56.5887	0.748078	0.0213087	PLL1
AT2G39350	277.332	164.797	0.752626	0.000154243	206.291	0.471076	0.0369802	ABCG1
AT2G39700	654.196	301.699	1.11666	0.000741279	358.542	0.91017	0.00198386	EXPA4
AT2G41850	1.54671	253.18	-7.35573	0.00626305	1314.12	-9.69061	2.46009e-10	ADPG2
AT2G43510	304.123	1417.15	-2.22024	0.0187338	1135.46	-1.85461	3.21938e-07	ATTI1
AT2G43820	1595.97	2217.9	-0.474645	0.0226316	2174.24	-0.401245	0.0202988	UGT74F2
AT2G44090	991.243	1304.62	-0.396397	0.0104018	1273.9	-0.319452	0.0265831	-
AT2G45760	6.48385	36.204	-2.47862	0.026287	53.7003	-3.01193	0.00208667	BAP2
AT2G45960	16717.4	22790.9	-0.447131	0.0467292	22841.8	-0.408984	0.00826497	PIP1B
AT2G46260	2412.99	3775.08	-0.645633	0.00063545	3310.71	-0.4144	0.0107338	-
AT2G46270	834.801	1204.7	-0.528951	0.0388154	1149.16	-0.419644	0.0448217	GBF3
AT2G46370	4275.38	1131.96	1.91751	6.85194e-32	1958.19	1.16875	2.14897e-10	JAR1
AT2G46790	158.055	262.461	-0.733227	0.0132762	256.863	-0.661364	0.013596	APRR9
AT2G48060	1772.03	2110.94	-0.252586	0.0457235	2378.82	-0.381517	0.00194554	-
AT3G02310	13.9484	1.01947	3.74974	0.0361535	0.349647	5.2532	0.0061086	2022-09-02
AT3G04630	339.945	498.641	-0.552029	0.0182533	509.59	-0.540692	0.00161246	WDL1
AT3G04950	93.8706	59.6437	0.652105	0.0338546	49.8495	0.953363	0.00252739	-
AT3G06345	944.78	2750.28	-1.54143	1.68489e-07	3018.22	-1.63514	3.34117e-13	-
AT3G07255	0.297501	9.45937	-4.84103	0.0247597	19.5787	-5.84396	0.000630918	-
AT3G07350	942.291	1323.97	-0.49058	0.0432207	1646.81	-0.762285	0.00109459	-
AT3G09390	5785	7630.56	-0.399393	0.031381	7709.64	-0.371304	0.0162829	MT2A
AT3G10020	3205.84	4840.6	-0.594486	0.0265595	4837.3	-0.554332	0.0332795	-
AT3G11530	158.311	294.777	-0.896255	0.000281481	250.878	-0.622762	0.0036302	-
AT3G12050	1350.21	1796.12	-0.411677	0.0051383	1681.49	-0.273719	0.037494	-
AT3G13670	3717.6	5213.24	-0.487812	0.0068627	5145.52	-0.426672	0.00616253	-
AT3G13750	19623.7	30361.6	-0.629656	0.0183713	29483.5	-0.548191	0.0341996	BGAL1
AT3G13840	20.9388	2.2573	3.24611	0.00701282	4.07241	2.3919	0.0291868	SCL29
AT3G18000	1166.77	675.213	0.788857	0.0413275	733.812	0.721081	0.025456	NMT1
AT3G20910	251.469	331.289	-0.397879	0.0318017	338.342	-0.386178	0.0411315	NFYA9
AT3G24542	218.837	760.536	-1.79686	1.45787e-07	526.95	-1.2177	0.000243116	-
AT3G25910	2286.02	3194.6	-0.482708	0.031726	3071.5	-0.384907	0.04492	-
AT3G26000	677.816	931.792	-0.458767	0.0118024	992.927	-0.508504	0.00078338	SKIP14
AT3G26180	1111.67	1704.12	-0.616198	0.0337103	1665.62	-0.540699	0.0313186	CYP71B20
AT3G28510	79.2206	13.7737	2.52118	1.36807e-07	25.9559	1.65116	0.00797678	-
AT3G28580	22.6501	6.23228	1.87704	0.0251328	5.58253	2.06822	0.0153597	-
AT3G45300	13277.3	20744.7	-0.643784	0.0161331	19315.2	-0.500865	0.0434451	IVD
AT3G47340	51033.4	86131.2	-0.755093	0.0213041	86790.4	-0.725107	0.013253	ASN1
AT3G50560	318.47	431.051	-0.437755	0.0251534	483.736	-0.559347	0.00152884	-
AT3G51640	650.972	880.266	-0.435764	0.00936559	870.46	-0.376767	0.0115927	-
AT3G54260	267.434	133.429	1.0043	0.0153296	105.632	1.37981	2.96525e-05	TBL36
AT3G54500	4825.84	12837.6	-1.41153	2.08497e-07	9114.55	-0.875689	0.000592661	-
AT3G55160	420.652	285.683	0.55753	0.0398497	306.18	0.506972	0.0465061	-
AT3G59710	34.9328	88.8298	-1.34856	0.0300806	116.922	-1.70592	0.000114291	-
AT3G60900	89.4409	45.8735	0.962268	0.023746	52.3232	0.820329	0.0311963	FLA10
AT3G62410	634.178	984.421	-0.634455	0.00367483	959.683	-0.556582	0.00530859	CP12-2
AT3G62500	57.183	94.7518	-0.72982	0.00974356	93.9965	-0.672942	0.0295017	-
AT3G66652	153.718	107.49	0.514247	0.0351802	99.1375	0.678286	0.00355122	FIPS3
AT4G01390	561.5	140.789	1.9983	7.65522e-09	270.142	1.09851	0.00657653	-
AT4G02920	1375.89	1806.32	-0.392752	0.00120173	1752.83	-0.3052	0.0239088	-
AT4G03510	1590.08	2607.27	-0.713356	0.0105915	2330.12	-0.510193	0.0270442	RMA1
AT4G08040	94.9188	37.6424	1.33744	0.00956735	21.055	2.22832	9.72376e-05	ACS11
AT4G13460	614.868	973.447	-0.662748	0.000104871	855.154	-0.432692	0.00911323	SUVH9
AT4G13830	1662.18	2859.57	-0.782695	0.000104143	2199.38	-0.362644	0.0496794	ATJ20
AT4G16146	219.035	321.118	-0.550925	0.0064736	305.593	-0.436218	0.0128311	-
AT4G16220	5.5765	0	4.82814	0.0214344	0.349647	3.93237	0.0311544	-
AT4G16680	1065.37	1691.19	-0.666369	0.00150034	1380.55	-0.330419	0.0319494	-
AT4G16730	0.624563	11.7227	-4.24688	0.00954359	5.94394	-3.2254	0.0313936	TPS02
AT4G16740	0.312261	7.43273	-4.49266	0.0128384	11.8878	-5.12507	0.00256714	TPS03
AT4G17870	1404.67	972.718	0.529731	0.0348186	1159.76	0.321292	0.0182663	PYR1
AT4G18350	10.2461	55.1629	-2.43062	0.0228429	58.198	-2.47467	4.39065e-06	NCED2
AT4G19970	2.73667	11.4576	-2.05754	0.0359863	36.4463	-3.67813	1.53643e-06	-
AT4G20070	834.03	506.476	0.718806	0.0113471	623.388	0.460222	0.0420452	AAH
AT4G20230	59.5893	24.9823	1.25515	0.027211	32.0106	0.934502	0.037608	-
AT4G21840	14.6938	83.8867	-2.51292	0.00177269	54.6932	-1.84739	0.00067623	MSRB8
AT4G21930	0.312302	7.03049	-4.41358	0.0131476	4.87741	-3.83996	0.0319011	-
AT4G23130	91.9406	43.3678	1.09049	0.0178711	58.652	0.696773	0.0288448	CRK5
AT4G23496	44.8959	6.49425	2.79817	6.8341e-05	3.80888	3.5916	3.91769e-07	SP1L5
AT4G24050	781.394	1391.97	-0.832945	0.0013119	1223	-0.602622	0.0165797	-
AT4G24680	2622.74	3295.79	-0.32957	0.023454	3223.28	-0.254612	0.046733	MOS1
AT4G24780	530.453	291.615	0.862479	0.0167831	308.206	0.823373	0.0191487	-
AT4G27450	14290	21572.4	-0.594189	0.016988	21322.4	-0.537041	0.02776	-
AT4G28250	225.742	61.8397	1.86943	4.64777e-05	76.1944	1.61213	0.000523322	EXPB3
AT4G28260	3191.39	4536.39	-0.507381	0.00187448	4342	-0.402275	0.010542	-
AT4G28270	766.109	1004.64	-0.391232	0.0256113	1083.61	-0.458282	0.0106021	RMA2
AT4G30110	465.522	228.3	1.02662	0.00165193	321.953	0.571005	0.029554	HMA2
AT4G31970	10.2168	77.6114	-2.92543	0.00179456	269.627	-4.68415	2.28496e-05	CYP82C2
AT4G32440	1216.68	1631.36	-0.423059	0.0196407	1661.43	-0.407592	0.0127804	-
AT4G33150	14047.8	25190.7	-0.842543	0.00650442	23491.9	-0.701329	0.00776348	-
AT4G35420	204.666	310.522	-0.600397	0.0438783	292.401	-0.47364	0.0424987	TKPR1
AT4G36400	1068.74	1468.23	-0.457931	0.0172605	1778.51	-0.690515	0.000271162	D2HGDH
AT4G36950	4.52168	35.8919	-2.98087	0.00381473	39.2324	-3.05046	0.000128686	MAPKKK21
AT4G37220	3526.62	6634.47	-0.911695	0.000427863	5422.02	-0.580129	0.00906769	-
AT4G39090	32171.5	41032.1	-0.350979	0.0266079	41760.8	-0.334616	0.020893	RD19A
AT4G39420	1860.86	2264.69	-0.283335	0.0261592	2272.83	-0.245199	0.0479236	-
AT5G01870	488.977	193.464	1.3368	0.00146626	275.219	0.865011	0.017498	LTP10
AT5G02020	678.858	1086.44	-0.678444	0.0142344	1092.78	-0.647902	0.0180615	SIS
AT5G02810	7397.99	12597.7	-0.76796	0.00163627	12958.7	-0.767232	0.00101349	APRR7
AT5G03090	96.4937	33.3594	1.53318	0.000260242	29.8365	1.74294	1.01558e-05	-
AT5G04950	630.631	226.658	1.47682	0.00324703	378.449	0.780664	0.00276028	NAS1
AT5G07580	632.801	373.206	0.761005	5.34823e-05	518.654	0.330057	0.0401602	ERF106
AT5G10170	266.935	142.594	0.903741	0.00165996	164.952	0.738417	0.013294	IPS3
AT5G10240	384.507	245.273	0.647678	0.0407851	275.313	0.528912	0.0295803	ASN3
AT5G12340	16.4182	62.5211	-1.92789	0.0240428	112.353	-2.73711	2.1861e-06	-
AT5G13170	14.8564	78.7703	-2.4084	0.00426141	76.5063	-2.32975	3.49444e-05	SWEET15
AT5G14420	1434.01	2304.8	-0.684502	0.00384037	2306.97	-0.643927	0.000438411	RGLG2
AT5G22430	9.04098	0.333559	4.56314	0.0184818	0.714942	3.70741	0.0343865	-
AT5G22500	700.392	360.324	0.9592	2.62014e-05	404.334	0.838772	0.000534787	FAR1
AT5G23480	19.587	43.5008	-1.14777	0.00758907	41.4228	-1.03383	0.032295	-
AT5G24160	339.542	875.629	-1.36652	0.0104144	669.123	-0.936267	0.000448055	SQE6
AT5G24205	423.301	599.194	-0.501967	0.0106238	578.758	-0.407974	0.0272676	-
AT5G24770	39.7974	474.508	-3.5758	0.000267943	263.211	-2.68393	4.07502e-08	VSP2
AT5G24780	70.0911	271.363	-1.95251	0.00720612	226.615	-1.65183	0.0010426	VSP1
AT5G25920	5.13136	21.0886	-2.02919	0.0498622	20.5917	-1.9422	0.0414031	-
AT5G27990	21.9208	48.2425	-1.14191	0.00882285	50.6075	-1.16843	0.0120807	-
AT5G28237	7.30267	48.2911	-2.72151	0.000978246	65.3181	-3.10495	2.28474e-05	-
AT5G36970	14.681	83.0832	-2.49775	0.0378598	67.5353	-2.13241	0.0244697	NHL25
AT5G37840	1.21961	14.0581	-3.52372	0.0186943	29.4189	-4.53666	2.2315e-05	-
AT5G37940	10.7672	2.2573	2.29071	0.0430982	2.42988	2.1891	0.0192037	-
AT5G39610	1686.4	2509.57	-0.57337	0.0384121	2488.05	-0.518752	0.0213548	NAC92
AT5G39850	271.824	138.775	0.971167	0.00176427	193.324	0.540557	0.0346969	RPS9C
AT5G40850	1783.32	936.534	0.929067	0.00281207	1163.34	0.667099	0.0229527	UPM1
AT5G43580	76.3692	1301.36	-4.09087	0.0112738	628	-2.99528	7.25535e-10	-
AT5G43590	0	11.1431	-6.03433	0.00917807	4.8637	-4.79828	0.0111803	-
AT5G44090	1756.91	2243.66	-0.352684	0.0466668	2267.93	-0.324345	0.0446465	-
AT5G44660	544.197	758.247	-0.478852	0.0028673	724.752	-0.369896	0.0350943	-
AT5G47610	114.934	216.015	-0.911035	0.000588455	183.553	-0.628318	0.0117658	ATL79
AT5G49360	21041.3	32316.9	-0.619069	0.0234347	33207	-0.618745	0.0133943	BXL1
AT5G50450	615.676	1044.85	-0.762975	0.024704	987.875	-0.64191	0.0333762	-
AT5G51450	497.89	633.532	-0.347603	0.018077	659.463	-0.360689	0.0287042	RIN3
AT5G51970	8778.92	13496.4	-0.620473	0.00520626	12158.2	-0.430017	0.0407723	SDH
AT5G52320	110.532	53.528	1.04802	0.00669032	66.8889	0.773279	0.00988877	CYP96A4
AT5G54585	106.941	176.111	-0.719762	0.0277967	197.271	-0.845685	0.00628118	-
AT5G57340	901.721	1668.25	-0.887497	0.00445913	1371.61	-0.564465	0.0352664	-
AT5G57550	228.63	552.873	-1.27296	0.000557595	445.666	-0.917137	3.1166e-05	XTH25
AT5G58500	114.169	42.2702	1.4393	0.00192363	64.9965	0.853191	0.0147834	LSH5
AT5G58800	1145.16	1775.94	-0.632937	0.0166075	1648.6	-0.484868	0.0257499	-
AT5G61430	198.523	79.8638	1.31495	0.0015027	116.71	0.807713	0.00187282	NAC100
AT5G66770	391.853	252.104	0.634738	0.00416327	307.88	0.393869	0.0256124	SCL4
AT5G66900	605.651	912.635	-0.591299	0.00629067	810.686	-0.376681	0.0468126	-
ATCG00920	71.6379	12.9005	2.46952	0.00531033	17.113	2.10601	0.00926222	RRN16S.1
ATCG01210	78.8653	12.7603	2.62219	0.00521352	16.6948	2.27883	0.00569589	RRN16S.2
ATMG00520	5.56207	20.6673	-1.89564	0.0129036	18.867	-1.72195	0.0276536	MATR
ATMG01360	58.3572	137.056	-1.23154	0.0210489	140.396	-1.22545	0.0079363	COX1
AT1G42705	87.8198	9.08463	3.26103	2.14318e-12	6.61189	3.77747	3.67035e-13	-
AT4G01975	79.6402	216.642	-1.44251	0.000585066	250.318	-1.60838	4.35699e-09	-
AT1G35745	32.6876	72.8335	-1.15711	0.0155189	58.2664	-0.795059	0.0385704	-
AT1G46552	70.8191	22.3293	1.66464	0.00451966	38.1946	0.931632	0.00837016	-
AT2G12040	22.0404	1.74587	3.64432	0.000186602	0.707117	5.02829	5.66096e-05	-

## Sheet: Table S2
GO analysis of common DEGs in ZmBES1/BZR1-3 expressing lines
Category	GOID	Description	GeneRatio	BgRatio	pvalue	padj	geneID	geneName	Count
BP	GO:0006979	response to oxidative stress	13/196	486/23118	0.000275286	0.0563964	AT5G24770/AT2G29450/AT4G21840/AT5G39610/AT1G14550/AT3G10020/AT5G44660/AT1G11650/AT2G46370/AT1G60470/AT5G04950/AT2G18150/AT3G28580	VSP2/GSTU5/MSRB8/NAC92/PER5/-/-/RBP45B/JAR1/GOLS4/NAS1/PER15/-	13
BP	GO:0006520	cellular amino acid metabolic process	13/196	490/23118	0.000297763	0.0563964	AT2G30660/AT5G28237/AT1G64660/AT4G33150/AT3G47340/AT2G43820/AT2G24850/AT3G45300/AT1G03090/AT4G08040/AT2G16570/AT1G65860/AT5G10240	-/-/MGL/-/ASN1/UGT74F2/TAT3/IVD/MCCA/ACS11/ASE1/FMOGS-OX1/ASN3	13
BP	GO:1901605	alpha-amino acid metabolic process	11/196	352/23118	0.000220421	0.0563964	AT2G30660/AT5G28237/AT1G64660/AT4G33150/AT3G47340/AT3G45300/AT1G03090/AT4G08040/AT2G16570/AT1G65860/AT5G10240	-/-/MGL/-/ASN1/IVD/MCCA/ACS11/ASE1/FMOGS-OX1/ASN3	11
BP	GO:0009063	cellular amino acid catabolic process	6/196	94/23118	0.000150809	0.0563964	AT2G30660/AT1G64660/AT4G33150/AT3G47340/AT3G45300/AT1G03090	-/MGL/-/ASN1/IVD/MCCA	6
BP	GO:0019748	secondary metabolic process	10/196	403/23118	0.00240726	0.173035	AT2G29440/AT2G29450/AT4G31970/AT2G25450/AT2G22990/AT1G22640/AT2G22980/AT1G67980/AT5G22500/AT1G65860	GSTU6/GSTU5/CYP82C2/GSL-OH/SNG1/MYB3/SCPL13/CCOAMT/FAR1/FMOGS-OX1	10
BP	GO:0009611	response to wounding	9/196	204/23118	6.41393e-05	0.0563964	AT5G43580/AT5G24770/AT2G28290/AT4G16740/AT1G22640/AT2G24850/AT2G26690/AT2G46370/AT5G22500	-/VSP2/SYD/TPS03/MYB3/TAT3/NPF6.2/JAR1/FAR1	9
BP	GO:0009083	branched-chain amino acid catabolic process	3/196	21/23118	0.00071319	0.106674	AT2G30660/AT3G45300/AT1G03090	-/IVD/MCCA	3
BP	GO:1901606	alpha-amino acid catabolic process	5/196	85/23118	0.000788507	0.106674	AT2G30660/AT1G64660/AT4G33150/AT3G45300/AT1G03090	-/MGL/-/IVD/MCCA	5
BP	GO:0009067	aspartate family amino acid biosynthetic process	4/196	52/23118	0.000986998	0.116836	AT1G64660/AT4G33150/AT3G47340/AT5G10240	MGL/-/ASN1/ASN3	4
BP	GO:0009753	response to jasmonic acid	8/196	243/23118	0.00114192	0.120156	AT5G24770/AT1G47510/AT2G28290/AT5G24780/AT4G16740/AT2G24850/AT2G26690/AT2G46370	VSP2/IP5P11/SYD/VSP1/TPS03/TAT3/NPF6.2/JAR1	8
BP	GO:0002213	defense response to insect	3/196	28/23118	0.00168174	0.159261	AT5G43580/AT5G24770/AT2G29350	-/VSP2/SAG13	3
BP	GO:0036294	cellular response to decreased oxygen levels	3/196	32/23118	0.00248369	0.173035	AT4G31970/AT3G62410/AT1G14550	CYP82C2/CP12-2/PER5	3
BP	GO:0071453	cellular response to oxygen levels	3/196	32/23118	0.00248369	0.173035	AT4G31970/AT3G62410/AT1G14550	CYP82C2/CP12-2/PER5	3
BP	GO:0016054	organic acid catabolic process	6/196	168/23118	0.00315714	0.173035	AT2G30660/AT1G64660/AT4G33150/AT3G47340/AT3G45300/AT1G03090	-/MGL/-/ASN1/IVD/MCCA	6
BP	GO:0046395	carboxylic acid catabolic process	6/196	168/23118	0.00315714	0.173035	AT2G30660/AT1G64660/AT4G33150/AT3G47340/AT3G45300/AT1G03090	-/MGL/-/ASN1/IVD/MCCA	6
BP	GO:0071214	cellular response to abiotic stimulus	7/196	225/23118	0.00316264	0.173035	AT5G13170/AT1G64660/AT5G02810/AT2G22660/AT2G46790/AT3G25910/AT2G46370	SWEET15/MGL/APRR7/GRDP1/APRR9/-/JAR1	7
BP	GO:0104004	cellular response to environmental stimulus	7/196	225/23118	0.00316264	0.173035	AT5G13170/AT1G64660/AT5G02810/AT2G22660/AT2G46790/AT3G25910/AT2G46370	SWEET15/MGL/APRR7/GRDP1/APRR9/-/JAR1	7
BP	GO:0009066	aspartate family amino acid metabolic process	4/196	72/23118	0.00328894	0.173035	AT1G64660/AT4G33150/AT3G47340/AT5G10240	MGL/-/ASN1/ASN3	4
BP	GO:0034219	carbohydrate transmembrane transport	4/196	77/23118	0.00418697	0.208688	AT5G13170/AT1G77210/AT1G75220/AT1G34580	SWEET15/STP14/-/STP5	4
BP	GO:0006949	syncytium formation	2/196	12/23118	0.00446334	0.211339	AT4G28250/AT2G39700	EXPB3/EXPA4	2
BP	GO:0071215	cellular response to abscisic acid stimulus	8/196	311/23118	0.00519739	0.21598	AT5G13170/AT5G14420/AT3G26000/AT1G12240/AT2G22660/AT2G04550/AT4G17870/AT2G01150	SWEET15/RGLG2/SKIP14/BFRUCT4/GRDP1/IBR5/PYR1/RHA2B	8
BP	GO:0097306	cellular response to alcohol	8/196	311/23118	0.00519739	0.21598	AT5G13170/AT5G14420/AT3G26000/AT1G12240/AT2G22660/AT2G04550/AT4G17870/AT2G01150	SWEET15/RGLG2/SKIP14/BFRUCT4/GRDP1/IBR5/PYR1/RHA2B	8
BP	GO:0071712	ER-associated misfolded protein catabolic process	2/196	13/23118	0.00524554	0.21598	AT4G28270/AT4G03510	RMA2/RMA1	2
BP	GO:0016311	dephosphorylation	9/196	388/23118	0.00604658	0.226642	AT5G24770/AT1G47510/AT5G24780/AT1G25230/AT1G72880/AT2G04550/AT5G44090/AT4G17870/AT2G35350	VSP2/IP5P11/VSP1/-/-/IBR5/-/PYR1/PLL1	9
BP	GO:0006656	phosphatidylcholine biosynthetic process	2/196	14/23118	0.00608582	0.226642	AT3G18000/AT1G73600	NMT1/-	2
BP	GO:0044282	small molecule catabolic process	7/196	255/23118	0.00622249	0.226642	AT2G30660/AT1G47510/AT1G64660/AT4G33150/AT3G47340/AT3G45300/AT1G03090	-/IP5P11/MGL/-/ASN1/IVD/MCCA	7
BP	GO:0009750	response to fructose	2/196	16/23118	0.00793645	0.237301	AT4G37220/AT3G47340	-/ASN1	2
BP	GO:0006541	glutamine metabolic process	3/196	49/23118	0.00830434	0.237301	AT3G47340/AT2G16570/AT5G10240	ASN1/ASE1/ASN3	3
BP	GO:0009309	amine biosynthetic process	3/196	49/23118	0.00830434	0.237301	AT5G28237/AT5G04950/AT3G18000	-/NAS1/NMT1	3
BP	GO:0042401	cellular biogenic amine biosynthetic process	3/196	49/23118	0.00830434	0.237301	AT5G28237/AT5G04950/AT3G18000	-/NAS1/NMT1	3
BP	GO:0048646	anatomical structure formation involved in morphogenesis	6/196	207/23118	0.00858636	0.237301	AT2G28290/AT4G35420/AT4G28250/AT2G39700/AT3G13840/AT2G39350	SYD/TKPR1/EXPB3/EXPA4/SCL29/ABCG1	6
BP	GO:0008645	hexose transmembrane transport	3/196	50/23118	0.0087801	0.237301	AT1G77210/AT1G75220/AT1G34580	STP14/-/STP5	3
BP	GO:0009081	branched-chain amino acid metabolic process	3/196	50/23118	0.0087801	0.237301	AT2G30660/AT3G45300/AT1G03090	-/IVD/MCCA	3
BP	GO:0071470	cellular response to osmotic stress	3/196	50/23118	0.0087801	0.237301	AT5G13170/AT2G22660/AT3G25910	SWEET15/GRDP1/-	3
BP	GO:0046677	response to antibiotic	8/196	342/23118	0.00899777	0.237301	AT5G13170/AT1G22640/AT5G39610/AT5G36970/AT1G79680/AT1G11650/AT2G46370/AT4G23130	SWEET15/MYB3/NAC92/NHL25/WAKL10/RBP45B/JAR1/CRK5	8
BP	GO:1901607	alpha-amino acid biosynthetic process	6/196	210/23118	0.00917907	0.237301	AT5G28237/AT1G64660/AT4G33150/AT3G47340/AT4G08040/AT5G10240	-/MGL/-/ASN1/ACS11/ASN3	6
BP	GO:0015749	monosaccharide transmembrane transport	3/196	51/23118	0.00927154	0.237301	AT1G77210/AT1G75220/AT1G34580	STP14/-/STP5	3
BP	GO:0008654	phospholipid biosynthetic process	5/196	154/23118	0.010187	0.247547	AT1G47510/AT4G13830/AT5G10170/AT3G18000/AT1G73600	IP5P11/ATJ20/IPS3/NMT1/-	5
BP	GO:0009738	abscisic acid-activated signaling pathway	7/196	281/23118	0.0103162	0.247547	AT5G14420/AT3G26000/AT1G12240/AT2G22660/AT2G04550/AT4G17870/AT2G01150	RGLG2/SKIP14/BFRUCT4/GRDP1/IBR5/PYR1/RHA2B	7
BP	GO:0007568	aging	5/196	155/23118	0.010456	0.247547	AT5G13170/AT2G29350/AT5G39610/AT4G08040/AT1G32450	SWEET15/SAG13/NAC92/ACS11/NPF7.3	5
BP	GO:0043068	positive regulation of programmed cell death	2/196	19/23118	0.0111226	0.250788	AT5G39610/AT5G51450	NAC92/RIN3	2
BP	GO:0071218	cellular response to misfolded protein	2/196	19/23118	0.0111226	0.250788	AT4G28270/AT4G03510	RMA2/RMA1	2
BP	GO:0006144	purine nucleobase metabolic process	2/196	21/23118	0.0135087	0.297506	AT2G16570/AT4G20070	ASE1/AAH	2
BP	GO:0008652	cellular amino acid biosynthetic process	6/196	231/23118	0.0141715	0.305009	AT5G28237/AT1G64660/AT4G33150/AT3G47340/AT4G08040/AT5G10240	-/MGL/-/ASN1/ACS11/ASN3	6
BP	GO:0036503	ERAD pathway	3/196	62/23118	0.015737	0.324308	AT4G28270/AT4G03510/AT5G51450	RMA2/RMA1/RIN3	3
BP	GO:0010030	positive regulation of seed germination	2/196	23/23118	0.0160956	0.324308	AT2G43820/AT1G75220	UGT74F2/-	2
BP	GO:0046470	phosphatidylcholine metabolic process	2/196	23/23118	0.0160956	0.324308	AT3G18000/AT1G73600	NMT1/-	2
BP	GO:1902600	proton transmembrane transport	6/196	239/23118	0.016493	0.325392	AT1G77210/ATMG01360/AT1G75220/AT2G26690/AT1G34580/AT1G32450	STP14/COX1/-/NPF6.2/STP5/NPF7.3	6
BP	GO:0015672	monovalent inorganic cation transport	7/196	311/23118	0.0171512	0.331025	AT1G77210/ATMG01360/AT1G75220/AT2G26690/AT2G35060/AT1G34580/AT1G32450	STP14/COX1/-/NPF6.2/KUP11/STP5/NPF7.3	7
BP	GO:0044550	secondary metabolite biosynthetic process	5/196	179/23118	0.0184487	0.331025	AT2G25450/AT1G22640/AT1G67980/AT5G22500/AT1G65860	GSL-OH/MYB3/CCOAMT/FAR1/FMOGS-OX1	5
BP	GO:0006551	leucine metabolic process	2/196	25/23118	0.0188758	0.331025	AT3G45300/AT1G03090	IVD/MCCA	2
BP	GO:0009292	genetic transfer	2/196	25/23118	0.0188758	0.331025	AT1G32750/AT4G13460	TAF1/SUVH9	2
BP	GO:0009294	DNA mediated transformation	2/196	25/23118	0.0188758	0.331025	AT1G32750/AT4G13460	TAF1/SUVH9	2
BP	GO:0044764	multi-organism cellular process	2/196	25/23118	0.0188758	0.331025	AT1G32750/AT4G13460	TAF1/SUVH9	2
BP	GO:0071396	cellular response to lipid	9/196	473/23118	0.0199538	0.343568	AT5G13170/AT5G14420/AT3G26000/AT1G12240/AT2G22660/AT1G77220/AT2G04550/AT4G17870/AT2G01150	SWEET15/RGLG2/SKIP14/BFRUCT4/GRDP1/-/IBR5/PYR1/RHA2B	9
BP	GO:0051788	response to misfolded protein	2/196	26/23118	0.0203361	0.343899	AT4G28270/AT4G03510	RMA2/RMA1	2
BP	GO:0006576	cellular biogenic amine metabolic process	3/196	69/23118	0.0208865	0.347009	AT5G28237/AT5G04950/AT3G18000	-/NAS1/NMT1	3
BP	GO:0000302	response to reactive oxygen species	5/196	186/23118	0.0213745	0.348995	AT5G39610/AT1G11650/AT2G46370/AT5G04950/AT3G28580	NAC92/RBP45B/JAR1/NAS1/-	5
BP	GO:0010942	positive regulation of cell death	2/196	27/23118	0.0218422	0.349034	AT5G39610/AT5G51450	NAC92/RIN3	2
BP	GO:0036293	response to decreased oxygen levels	3/196	71/23118	0.0225077	0.349034	AT4G31970/AT3G62410/AT1G14550	CYP82C2/CP12-2/PER5	3
BP	GO:0070482	response to oxygen levels	3/196	72/23118	0.0233433	0.349034	AT4G31970/AT3G62410/AT1G14550	CYP82C2/CP12-2/PER5	3
BP	GO:0051346	negative regulation of hydrolase activity	3/196	73/23118	0.0241955	0.349034	AT5G43580/AT2G43510/AT4G17870	-/ATTI1/PYR1	3
BP	GO:0009555	pollen development	7/196	334/23118	0.0242052	0.349034	AT2G35060/AT3G20910/AT4G35420/AT5G04950/AT3G18000/AT1G73600/AT2G39350	KUP11/NFYA9/TKPR1/NAS1/NMT1/-/ABCG1	7
BP	GO:0032527	protein exit from endoplasmic reticulum	2/196	29/23118	0.0249877	0.349034	AT4G03510/AT5G51450	RMA1/RIN3	2
BP	GO:0009744	response to sucrose	3/196	74/23118	0.0250645	0.349034	AT3G62410/AT4G37220/AT3G47340	CP12-2/-/ASN1	3
BP	GO:0035967	cellular response to topologically incorrect protein	3/196	75/23118	0.0259501	0.349034	AT4G28270/AT4G03510/AT5G51450	RMA2/RMA1/RIN3	3
BP	GO:0071456	cellular response to hypoxia	2/196	30/23118	0.0266255	0.349034	AT4G31970/AT1G14550	CYP82C2/PER5	2
BP	GO:0010017	red or far-red light signaling pathway	3/196	76/23118	0.0268523	0.349034	AT5G02810/AT2G46790/AT2G46370	APRR7/APRR9/JAR1	3
BP	GO:0034285	response to disaccharide	3/196	76/23118	0.0268523	0.349034	AT3G62410/AT4G37220/AT3G47340	CP12-2/-/ASN1	3
BP	GO:0009966	regulation of signal transduction	7/196	343/23118	0.027441	0.349034	AT2G28290/AT3G26000/AT2G22660/AT1G77220/AT2G04550/AT3G55160/AT2G01150	SYD/SKIP14/GRDP1/-/IBR5/-/RHA2B	7
BP	GO:1902531	regulation of intracellular signal transduction	3/196	77/23118	0.0277712	0.349034	AT2G28290/AT2G04550/AT3G55160	SYD/IBR5/-	3
BP	GO:0008299	isoprenoid biosynthetic process	5/196	200/23118	0.0280962	0.349034	AT4G18350/AT4G16740/AT4G16730/AT4G13830/AT4G20230	NCED2/TPS03/TPS02/ATJ20/-	5
BP	GO:0006515	protein quality control for misfolded or incompletely synthesized proteins	2/196	31/23118	0.0283055	0.349034	AT4G28270/AT4G03510	RMA2/RMA1	2
BP	GO:0006109	regulation of carbohydrate metabolic process	3/196	78/23118	0.0287066	0.349034	AT2G25450/AT3G62410/AT4G13830	GSL-OH/CP12-2/ATJ20	3
BP	GO:0045089	positive regulation of innate immune response	3/196	78/23118	0.0287066	0.349034	AT5G39610/AT5G51450/AT2G46370	NAC92/RIN3/JAR1	3
BP	GO:0071489	cellular response to red or far red light	3/196	78/23118	0.0287066	0.349034	AT5G02810/AT2G46790/AT2G46370	APRR7/APRR9/JAR1	3
BP	GO:0009698	phenylpropanoid metabolic process	4/196	137/23118	0.0294463	0.349034	AT2G22990/AT1G22640/AT1G67980/AT5G22500	SNG1/MYB3/CCOAMT/FAR1	4
BP	GO:0006790	sulfur compound metabolic process	8/196	427/23118	0.0296952	0.349034	AT2G29440/AT2G29450/AT4G31970/AT1G64660/AT2G25450/AT4G33150/AT5G22500/AT1G65860	GSTU6/GSTU5/CYP82C2/MGL/GSL-OH/-/FAR1/FMOGS-OX1	8
BP	GO:0009625	response to insect	2/196	32/23118	0.030027	0.349034	AT5G24770/AT4G16740	VSP2/TPS03	2
BP	GO:0009308	amine metabolic process	4/196	138/23118	0.0301311	0.349034	AT5G28237/AT5G14420/AT5G04950/AT3G18000	-/RGLG2/NAS1/NMT1	4
BP	GO:0023051	regulation of signaling	7/196	351/23118	0.0305545	0.349034	AT2G28290/AT3G26000/AT2G22660/AT1G77220/AT2G04550/AT3G55160/AT2G01150	SYD/SKIP14/GRDP1/-/IBR5/-/RHA2B	7
BP	GO:0002684	positive regulation of immune system process	3/196	80/23118	0.0306273	0.349034	AT5G39610/AT5G51450/AT2G46370	NAC92/RIN3/JAR1	3
BP	GO:0050778	positive regulation of immune response	3/196	80/23118	0.0306273	0.349034	AT5G39610/AT5G51450/AT2G46370	NAC92/RIN3/JAR1	3
BP	GO:0010646	regulation of cell communication	7/196	352/23118	0.0309597	0.349034	AT2G28290/AT3G26000/AT2G22660/AT1G77220/AT2G04550/AT3G55160/AT2G01150	SYD/SKIP14/GRDP1/-/IBR5/-/RHA2B	7
BP	GO:0030488	tRNA methylation	2/196	33/23118	0.0317891	0.354167	AT1G03110/AT3G55160	TRM82/-	2
BP	GO:0035966	response to topologically incorrect protein	3/196	82/23118	0.032614	0.355186	AT4G28270/AT4G03510/AT5G51450	RMA2/RMA1/RIN3	3
BP	GO:0010193	response to ozone	2/196	34/23118	0.0335909	0.355186	AT1G11650/AT2G46370	RBP45B/JAR1	2
BP	GO:0010029	regulation of seed germination	3/196	83/23118	0.033632	0.355186	AT2G43820/AT5G39610/AT1G75220	UGT74F2/NAC92/-	3
BP	GO:0007623	circadian rhythm	4/196	143/23118	0.033696	0.355186	AT3G54500/AT5G02810/AT1G18330/AT2G46790	-/APRR7/RVE7/APRR9	4
BP	GO:0098662	inorganic cation transmembrane transport	8/196	438/23118	0.0337558	0.355186	AT1G77210/ATMG01360/AT1G75220/AT2G26690/AT2G35060/AT1G34580/AT1G32450/AT4G30110	STP14/COX1/-/NPF6.2/KUP11/STP5/NPF7.3/HMA2	8
BP	GO:0048585	negative regulation of response to stimulus	5/196	212/23118	0.0348195	0.362352	AT5G14420/AT3G26000/AT1G77220/AT2G04550/AT2G46370	RGLG2/SKIP14/-/IBR5/JAR1	5
BP	GO:1900140	regulation of seedling development	3/196	87/23118	0.0378675	0.389789	AT2G43820/AT5G39610/AT1G75220	UGT74F2/NAC92/-	3
BP	GO:0044106	cellular amine metabolic process	3/196	88/23118	0.038967	0.391034	AT5G28237/AT5G04950/AT3G18000	-/NAS1/NMT1	3
BP	GO:0016106	sesquiterpenoid biosynthetic process	2/196	37/23118	0.0392273	0.391034	AT4G18350/AT4G16740	NCED2/TPS03	2
BP	GO:2000070	regulation of response to water deprivation	2/196	37/23118	0.0392273	0.391034	AT5G14420/AT4G17870	RGLG2/PYR1	2
BP	GO:0008643	carbohydrate transport	4/196	152/23118	0.0407076	0.397424	AT5G13170/AT1G77210/AT1G75220/AT1G34580	SWEET15/STP14/-/STP5	4
BP	GO:0048511	rhythmic process	4/196	152/23118	0.0407076	0.397424	AT3G54500/AT5G02810/AT1G18330/AT2G46790	-/APRR7/RVE7/APRR9	4
BP	GO:0046474	glycerophospholipid biosynthetic process	3/196	91/23118	0.0423622	0.409357	AT1G47510/AT3G18000/AT1G73600	IP5P11/NMT1/-	3
BP	GO:0006720	isoprenoid metabolic process	5/196	228/23118	0.0452164	0.432525	AT4G18350/AT4G16740/AT4G16730/AT4G13830/AT4G20230	NCED2/TPS03/TPS02/ATJ20/-	5
BP	GO:0010208	pollen wall assembly	2/196	41/23118	0.0472527	0.4375	AT4G35420/AT2G39350	TKPR1/ABCG1	2
BP	GO:0085029	extracellular matrix assembly	2/196	41/23118	0.0472527	0.4375	AT4G35420/AT2G39350	TKPR1/ABCG1	2
BP	GO:0009751	response to salicylic acid	5/196	231/23118	0.0473513	0.4375	AT5G13170/AT1G22640/AT5G36970/AT1G79680/AT4G23130	SWEET15/MYB3/NHL25/WAKL10/CRK5	5
BP	GO:0016114	terpenoid biosynthetic process	4/196	160/23118	0.0475844	0.4375	AT4G18350/AT4G16740/AT4G16730/AT4G20230	NCED2/TPS03/TPS02/-	4
BP	GO:0009699	phenylpropanoid biosynthetic process	3/196	96/23118	0.048339	0.440164	AT1G22640/AT1G67980/AT5G22500	MYB3/CCOAMT/FAR1	3
BP	GO:0051336	regulation of hydrolase activity	5/196	233/23118	0.0488073	0.440196	AT5G43580/AT2G43510/AT3G12050/AT5G44090/AT4G17870	-/ATTI1/-/-/PYR1	5
BP	GO:0098655	cation transmembrane transport	8/196	474/23118	0.0496407	0.443488	AT1G77210/ATMG01360/AT1G75220/AT2G26690/AT2G35060/AT1G34580/AT1G32450/AT4G30110	STP14/COX1/-/NPF6.2/KUP11/STP5/NPF7.3/HMA2	8

## Sheet: Table S3
The common DEGs of ZmBES1/BZR1-9 expressing lines										13 DEGs response to water deprivation
gene_id	control	L9_3	log2FoldChange	pvalue	L9_5	log2FoldChange	pvalue	gene_name		Gene ID	up/down regulated	negatively/positively regulate drought
AT1G01070	250.652	95.7135	1.38885	3.05e-05	113.556	1.13856	0.00341698	-		AT3G23250	down-regulated	positively
AT1G01380	32.5059	6.94359	2.21935	0.000175652	8.14647	2.00076	0.00462226	ETC1		AT1G43160	down-regulated	positively
AT1G01480	85.317	16.3907	2.38026	0.000462578	6.59724	3.68748	2.32694e-07	ACS2		AT2G38340	down-regulated	positively
AT1G01560	111.793	11.8026	3.24548	0.000342201	5.73149	4.29306	2.03591e-05	MPK11		AT1G17950	down-regulated	positively
AT1G02220	134.455	35.1947	1.93073	0.000357962	40.7007	1.72082	0.00421194	NAC003		AT3G13672	down-regulated	positively
AT1G02310	40.0831	5.78756	2.77678	0.0016932	5.27862	2.9139	7.12554e-05	MAN1		AT1G52400	down-regulated	positively
AT1G02520	365.363	134.584	1.44002	7.56e-09	154.944	1.23664	0.000112253	ABCB11		AT1G67360	down-regulated	positively
AT1G02900	442.737	87.2473	2.34144	2.32e-10	147.742	1.58175	0.00372796	RALF1		AT1G56600	down-regulated	positively
AT1G02980	8.53405	0.34508	4.56831	0.00476117	0	5.52728	0.00131278	CUL2		AT2G46680	down-regulated	positively	positively regulated stomatal aperture
AT1G03220	5584.58	1940.63	1.52482	8.31e-12	2029.6	1.45829	1.0348e-05	-		AT2G47800	down-regulated	positively	positively regulated stomatal aperture
AT1G03850	497.542	200.981	1.30648	1.15e-05	118.644	2.06556	2.01543e-07	-		AT4G23450	down-regulated	positively	positively regulated stomatal aperture
AT1G04247	30.2253	5.96927	2.33504	0.000634614	10.6767	1.49713	0.00673287	-		AT5G37500	down-regulated	positively	positively regulated stomatal aperture
AT1G04770	455.065	160.453	1.5026	5.21e-11	201.926	1.17227	0.0014531	-		AT1G80710	up-regulated	negatively
AT1G05000	1229.01	438.146	1.48797	0.000324147	346.077	1.82678	1.18513e-10	-
AT1G05220	31.2121	9.35798	1.73731	0.0041934	4.66562	2.73703	7.87165e-05	-
AT1G05280	48.5745	7.28764	2.73333	0.000887911	6.55601	2.88166	0.0048247	-
AT1G05575	83.5377	31.1637	1.41909	8.01e-05	25.6983	1.69928	4.68001e-06	-
AT1G05610	32.8055	12.3734	1.40677	0.00476438	5.70761	2.52433	4.14495e-05	APS2
AT1G06080	233.076	1274.61	-2.45137	3.43e-31	1021.62	-2.13379	3.53275e-15	ADS1
AT1G06620	490.229	130.882	1.90375	2.96e-06	101.615	2.26908	1.58098e-09	-
AT1G06640	1530.65	493.051	1.63367	1.01e-09	436.514	1.80833	7.99048e-06	-
AT1G06883	9.84183	0	5.7359	0.000494289	0.336372	4.77163	0.0023205	-
AT1G07150	234.893	116.172	1.01528	2.26e-05	89.1773	1.39621	1.66827e-07	MAPKKK13
AT1G08050	172.823	76.6466	1.17161	0.00134848	79.9518	1.11082	0.00747909	-
AT1G08165	67.9119	8.86275	2.92542	1.11e-08	7.08715	3.26576	2.35901e-09	-
AT1G08290	65.7119	18.9583	1.79856	8.15e-05	13.357	2.29569	0.00100268	WIP3
AT1G08310	1068.14	159.049	2.74753	6.05e-05	87.5875	3.60835	2.34417e-47	-
AT1G08320	449.489	110.651	2.02069	6.48e-06	100.769	2.1551	0.000158309	TGA9
AT1G08340	152.805	30.5208	2.32474	3.41e-07	49.8288	1.61476	0.00104763	ROPGAP5
AT1G08650	918.546	90.2769	3.34339	5.1e-31	79.1149	3.53607	2.53665e-16	PPCK1
AT1G08920	665.146	243.963	1.44659	2.79e-14	209.004	1.66924	3.95009e-06	ESL1
AT1G08947	14.7604	1.31956	3.4718	0.00169655	0.687089	4.45026	0.00123434	-
AT1G09240	308.622	59.494	2.37587	1.68e-07	99.1748	1.63901	0.000546203	NAS3
AT1G09560	1937.28	715.032	1.43777	6.16e-08	932.21	1.05382	0.000110089	GLP4
AT1G09740	1404.24	564.169	1.31501	2.39e-09	554.575	1.33859	9.96103e-08	-
AT1G09932	102.737	20.1399	2.34601	4.11e-07	20.1753	2.34679	0.00155536	-
AT1G10040	141.269	59.2513	1.25113	0.000454302	57.7416	1.28932	0.000547909	-
AT1G10300	75.0917	25.3454	1.56573	2.87e-05	18.8764	1.98787	0.00052583	-
AT1G10340	288.104	74.909	1.94288	1.75e-05	64.0998	2.16928	2.20538e-05	-
AT1G10460	41.6125	4.33398	3.26105	2.68e-07	9.0134	2.20533	0.000315715	GLP7
AT1G10530	44.3745	5.87812	2.9014	1.15e-05	11.0006	2.00811	0.00240341	-
AT1G10550	201.182	461.296	-1.19692	0.00100747	763.611	-1.92237	6.87717e-07	XTH33
AT1G10680	8.90562	0	5.59108	0.00189971	0.343544	4.62304	0.00701126	ABCB10
AT1G10682	1021.78	500.321	1.02955	0.0021296	476.703	1.09713	0.00539716	-
AT1G11100	119.207	48.5288	1.29481	0.000545682	57.5175	1.04791	0.0053209	-
AT1G11190	192.751	12.5374	3.93433	6.61e-18	31.4125	2.61313	5.39888e-05	ENDO1
AT1G11300	135.542	66.6036	1.02532	0.00021217	51.9886	1.37996	0.00028867	-
AT1G11460	33.5664	6.91321	2.27073	0.000711034	5.38258	2.64017	0.00018576	-
AT1G11600	65.9637	168.34	-1.35145	0.00445081	240.464	-1.86707	0.000325456	CYP77B1
AT1G11670	510.542	148.997	1.77541	3.34e-05	138.39	1.88061	0.000410771	DTX36
AT1G11740	66.8722	153.872	-1.20267	7.76e-05	198.624	-1.57114	4.1941e-05	-
AT1G11840	3056.65	1214.07	1.33184	3.36e-17	1266.92	1.26945	8.50707e-05	ATGLX1
AT1G12160	97.3346	16.254	2.57551	0.000222314	16.1979	2.58051	3.98668e-05	-
AT1G12805	97.9507	0	9.05111	5.29e-10	0.993589	6.61725	5.93271e-08	-
AT1G12950	215.223	26.3328	3.0269	5.61e-09	38.3921	2.484	0.00454967	DTX31
AT1G13080	393.2	157.022	1.32302	0.000808995	130.962	1.58321	0.000433691	CYP71B2
AT1G13340	245.745	73.3951	1.74285	8.03e-10	75.1297	1.70862	2.9235e-06	-
AT1G13520	184.725	12.7766	3.85559	3.87e-09	17.3415	3.40811	8.04206e-05	-
AT1G13620	19.6886	2.29418	3.0878	0.00209678	2.29368	3.08756	0.0066968	RGF2
AT1G13750	547.392	73.5383	2.89564	0.000322572	64.4655	3.08502	4.56516e-15	PAP1
AT1G13830	121.432	26.9319	2.1676	7.65e-06	28.4018	2.09267	0.00126987	-
AT1G13970	142.921	28.718	2.31028	5.54e-09	37.3381	1.935	0.00122907	-
AT1G14120	592.82	217.426	1.44585	3.59e-05	193.168	1.61562	0.00890354	-
AT1G14220	130.416	3.70459	5.14462	3.23e-17	8.55454	3.92154	4.10777e-07	-
AT1G14240	114.745	13.6015	3.0739	9.62e-07	16.4549	2.79617	0.00838618	APY3
AT1G14520	201.223	606.171	-1.59123	7.31e-09	458.756	-1.19098	0.00309969	MIOX1
AT1G14730	539.45	200.884	1.42416	2.72e-07	262.323	1.03774	0.00367542	CYB561C
AT1G14780	297.872	92.7129	1.68291	1.53e-11	128.64	1.20856	1.36264e-05	-
AT1G14860	250.712	92.8016	1.43105	1.48e-08	115.716	1.11344	0.000409354	NUDT18
AT1G14870	2092.85	571.129	1.87312	7.15e-08	655.517	1.67379	1.19895e-05	PCR2
AT1G15125	1645.67	621.052	1.40595	0.0004915	528.379	1.64204	0.00203886	-
AT1G15380	3876.61	1675.08	1.21051	9.47e-07	1145.64	1.75815	8.69127e-09	-
AT1G15385	16.3389	0.659925	4.61647	0.000639191	1.68486	3.28562	0.00162051	-
AT1G15790	132.081	55.8179	1.24086	0.000189617	59.7431	1.14425	0.00288303	-
AT1G16120	61.0989	15.3099	1.98908	0.00203405	11.2186	2.43771	0.000424088	WAKL1
AT1G16150	58.8662	16.7804	1.80562	0.00140761	21.2352	1.46935	0.00842678	WAKL4
AT1G16905	29.2131	0.314845	6.34367	5e-06	2.67427	3.44613	0.000243171	-
AT1G17020	529.286	113.197	2.22405	7.13e-20	122.751	2.10702	1.04329e-05	SRG1
AT1G17147	118.688	47.8981	1.3081	0.00264501	34.4989	1.78213	9.2526e-09	VQ1
AT1G17180	213.732	17.0946	3.63856	6.46e-11	16.7608	3.6708	5.444e-14	GSTU25
AT1G17190	421.368	66.4626	2.66187	1.61e-10	96.387	2.12597	6.49744e-06	GSTU26
AT1G17285	28.5432	1.34994	4.41182	5.41e-06	2.93655	3.26628	0.00231616	-
AT1G17300	21.7072	0.689866	5.00987	0.000103462	1.33713	4.01655	0.000104598	-
AT1G17380	95.1174	20.6668	2.20201	0.00209062	13.4107	2.83013	0.000326123	TIFY11A
AT1G17710	1974.72	93.288	4.4031	6.48e-12	51.614	5.26115	7.40372e-42	-
AT1G17830	205.959	42.5609	2.27347	7.5e-09	34.2223	2.5913	1.11563e-10	-
AT1G17950	71.0025	11.2468	2.65363	9.83e-06	16.5714	2.09322	0.000542066	MYB52
AT1G18100	373.699	53.1739	2.80966	1.15e-10	53.8958	2.79098	1.83982e-05	MFT
AT1G18870	942.633	69.6329	3.75723	4.55e-65	87.2547	3.43309	5.20162e-29	ICS2
AT1G18880	600.511	197.029	1.60721	5.27e-08	237.731	1.33417	0.00614141	NPF2.9
AT1G18970	112.67	25.5511	2.13834	0.00926975	20.2195	2.47373	0.00455961	GLP1
AT1G18980	170.88	22.2827	2.93335	5.93e-08	32.2196	2.4032	0.00357095	-
AT1G19020	640.494	206.498	1.63289	7.86e-09	181.022	1.82266	2.81812e-07	-
AT1G19180	823.374	366.918	1.16598	0.000850056	273.867	1.59006	0.000164449	TIFY10A
AT1G19200	208.093	26.2597	2.98396	1.05e-14	31.5068	2.72268	1.72017e-08	FLZ12
AT1G19230	339.397	51.6165	2.71525	2.16e-09	63.7187	2.41056	0.000222397	RBOHE
AT1G20400	50.4694	7.2577	2.7911	3.24e-05	6.98618	2.84863	2.55403e-07	-
AT1G20510	672.82	306.601	1.13391	0.00310457	240.323	1.48719	0.000460602	4CLL5
AT1G20860	218.583	9.25085	4.55727	0.00090448	3.69773	5.88751	6.80445e-23	PHT1;8
AT1G21390	158.474	68.3239	1.21231	0.00198132	63.2419	1.32241	0.000630795	emb2170
AT1G21890	27.2382	3.17868	3.07265	0.00204665	1.01211	4.75764	4.77599e-06	-
AT1G22150	119.558	12.6875	3.23543	2.74e-15	10.4945	3.51335	2.06165e-06	SULTR1;3
AT1G22220	105.757	14.7272	2.84517	3.46e-12	6.97782	3.91694	1.11607e-12	-
AT1G22490	57.0392	21.8958	1.37746	0.000491897	20.1335	1.50297	0.0018434	-
AT1G23120	468.853	118.78	1.97992	6.3e-08	88.8385	2.39985	8.38731e-11	-
AT1G23140	383.94	62.6685	2.61376	7.66e-10	46.1023	3.05753	2.40906e-20	CAR8
AT1G23160	122.34	3.26895	5.20406	4.1e-16	8.58441	3.82754	1.31994e-08	-
AT1G23510	2.62826	23.457	-3.15886	4.99e-05	17.8732	-2.76664	0.00262658	-
AT1G23730	1040.41	166.163	2.64655	6.41e-53	227.829	2.19079	3.30127e-07	BCA3
AT1G23750	176.149	74.4758	1.24067	0.000189107	74.148	1.24627	0.000294886	-
AT1G23850	328.608	118.98	1.46504	0.000145578	99.3271	1.7256	1.6504e-07	-
AT1G24140	68.3169	17.0345	1.99814	0.00149025	12.9417	2.39363	7.05287e-06	3MMP
AT1G24430	203.628	37.3671	2.44386	0.00030708	31.8277	2.67418	0.0022193	-
AT1G24575	289.367	82.9953	1.80212	8.01e-14	80.3396	1.84807	2.26173e-09	-
AT1G25400	1713.58	837.694	1.03246	0.000360604	781.316	1.13205	0.00218581	-
AT1G26420	88.2478	20.4694	2.1087	0.0106563	30.1004	1.55106	0.0079689	FOX5
AT1G26540	44.9	105.502	-1.23171	0.00238473	123.388	-1.45881	2.02219e-05	DUF3
AT1G26800	416.946	181.993	1.1951	1.85e-06	169.003	1.30156	3.82356e-05	MPSR1
AT1G26820	100.14	13.875	2.85575	2.61e-06	18.8119	2.41325	1.24029e-05	RNS3
AT1G26970	59.7059	2.51876	4.53377	2.31e-05	7.96006	2.90194	0.000923388	PBL4
AT1G27030	1077.93	135.683	2.98817	3.17e-18	250.777	2.10243	0.000163891	-
AT1G27140	125.745	13.4803	3.21791	4.76e-05	5.2374	4.57375	2.80199e-07	GSTU14
AT1G27380	33.1726	6.88327	2.2569	0.00039805	10.9605	1.59202	0.00814263	RIC2
AT1G28130	1626.66	488.217	1.73572	1.39e-13	566.251	1.52029	0.00032517	GH3.17
AT1G28190	312.587	150.575	1.05415	2.33e-05	119.599	1.38644	3.92751e-05	-
AT1G28370	69.8049	22.0165	1.66377	2.35e-05	19.7188	1.82371	0.0010139	ERF11
AT1G28470	89.3406	15.7761	2.49235	2.57e-08	25.0817	1.82824	0.00393331	NAC010
AT1G28480	111.637	15.7006	2.8299	0.000152677	6.26086	4.15266	3.38926e-07	GRXC9
AT1G28590	50.6131	8.68134	2.53323	0.00483091	10.3063	2.29083	0.000174344	-
AT1G28610	166.581	73.7696	1.17487	0.00266905	79.9656	1.05845	0.00596657	-
AT1G29050	743.627	295.454	1.33128	1.15e-07	330.65	1.1683	0.00269054	TBL38
AT1G29290	71.7951	28.5977	1.32288	0.00401602	30.4093	1.23884	0.00108392	CEP14
AT1G30110	211.547	84.3245	1.32499	0.00028819	85.3751	1.30587	0.00340931	NUDT25
AT1G30420	1272.29	547.139	1.21743	2.59e-08	566.182	1.16723	3.32074e-06	ABCC11
AT1G30475	102.062	33.5352	1.60722	1.52e-07	38.9901	1.38642	0.00846102	-
AT1G30550	89.1314	11.545	2.93976	0.000682052	12.2481	2.86065	0.00140357	-
AT1G30560	80.4337	0.944534	6.34103	2.99e-10	2.0057	5.32502	8.46824e-11	-
AT1G30700	446.923	61.4947	2.86086	0.00171651	127.051	1.81255	0.00138521	-
AT1G30730	640.578	258.683	1.30815	0.00272423	172.48	1.8928	0.000327806	-
AT1G30750	172.061	28.7313	2.5774	5.4e-06	37.0663	2.21113	0.00839345	-
AT1G30840	140.816	25.6751	2.45811	1.52e-06	41.6704	1.75346	0.00584016	PUP4
AT1G30900	279.542	75.0849	1.89531	0.000104289	89.2556	1.64429	0.00258896	VSR6
AT1G31050	193.604	57.4021	1.75262	0.00345842	53.0886	1.86258	0.00302642	-
AT1G31750	130.842	33.9525	1.94477	8.83e-07	44.8357	1.54238	0.00113964	-
AT1G31910	2856.39	832.017	1.7794	2.06e-15	819.408	1.80195	8.15746e-15	PMK
AT1G31950	402.461	47.0726	3.09566	2.27e-09	68.4292	2.55337	0.000650148	-
AT1G33055	612.883	276.699	1.14656	3.74e-05	295.964	1.04968	0.000202038	-
AT1G33280	43.6706	3.95867	3.45585	4.36e-05	4.6471	3.22444	2.20825e-05	BRN1
AT1G33960	523.142	44.8838	3.54275	0.00177302	22.9206	4.51694	7.31391e-05	AIG1
AT1G34040	75.5492	15.5338	2.27684	0.00977788	11.886	2.66344	0.00439722	TAR3
AT1G34060	69.6019	18.445	1.90948	6.09e-05	27.9519	1.31206	0.0013015	TAR4
AT1G34315	501.734	127.407	1.9756	5.32e-10	141.458	1.8252	1.23615e-17	-
AT1G34420	200.393	83.2474	1.26478	1.39e-06	61.4357	1.70328	2.40873e-06	-
AT1G34540	25.2089	1.31956	4.24545	0.000350996	1.66216	3.91714	0.00103342	CYP94D1
AT1G34670	131.668	23.3475	2.49166	1.84e-05	23.8175	2.46317	0.000300931	AtMYB93
AT1G35260	382.787	160.045	1.25596	4.77e-07	188.742	1.01907	0.00436005	MLP165
AT1G35320	368.752	56.1453	2.71232	5.73e-14	74.2706	2.30906	0.000465479	-
AT1G35515	56.5081	18.2642	1.62209	0.00594867	13.6235	2.04738	0.000543638	MYB8
AT1G35720	6072.43	1883.6	1.68868	3.11e-10	2233.02	1.44368	0.00013008	ANN1
AT1G35910	59.7745	14.7884	2.01783	4.77e-06	21.7359	1.45716	0.00847355	TPPD
AT1G36920	70.5346	13.1973	2.40979	5.75e-08	12.7237	2.46996	1.23474e-09	-
AT1G36922	44.5648	7.8576	2.49223	5.14e-05	8.98471	2.30614	1.74249e-05	-
AT1G37150	65.688	27.1921	1.27394	0.00094044	13.639	2.2626	3.70141e-06	HCS2
AT1G40087	16.8145	0.629689	4.67927	0.00122021	0.975067	4.07967	0.00371762	-
AT1G43010	30.519	2.38444	3.69139	8.6e-05	2.98077	3.34689	0.000109387	-
AT1G43160	125.763	14.1711	3.14186	5.55e-12	17.8404	2.81609	0.000542498	RAP2-6
AT1G43800	2495.86	12.7316	7.61191	1.37e-12	21.1025	6.89051	1.05515e-12	S-ACP-DES6
AT1G43910	747.031	125.393	2.57474	0.000822092	224.954	1.73555	0.00618635	-
AT1G44130	37.1889	3.35907	3.47166	0.000254287	3.31714	3.48403	7.85096e-05	-
AT1G44160	170.598	42.7078	1.99423	1.24e-05	49.864	1.77109	0.00288132	-
AT1G44318	120.805	1.57422	6.19219	6.06e-15	4.64292	4.69479	2.22647e-12	HEMB2
AT1G44608	65.3515	10.3327	2.65875	3.22e-08	22.9929	1.50331	0.000763865	-
AT1G44830	48.2324	111.212	-1.20555	0.000458822	126.312	-1.38909	9.51785e-05	ERF014
AT1G44970	195.665	22.2233	3.13274	8.12e-08	34.0999	2.51707	0.00721852	PER9
AT1G45145	2844.19	721.479	1.97848	3.81e-16	451.799	2.65346	2.74221e-15	TRX5
AT1G45191	47.7829	18.5655	1.36099	0.0066441	9.98846	2.25673	0.00042332	BGLU1
AT1G45201	1743.97	666.709	1.3869	4.79e-07	701.871	1.31204	0.00152989	ATTLL1
AT1G45545	20.6263	0.344933	5.84188	3.88e-05	2.6641	2.94867	0.000726745	-
AT1G47480	289.871	83.4341	1.79517	0.000498095	71.8084	2.01106	0.00111397	CXE2
AT1G47510	73.7183	10.3332	2.83291	3.64e-09	12.4369	2.57047	1.20265e-07	IP5P11
AT1G47600	312.885	14.2583	4.4529	0.00575704	17.7633	4.13803	0.00211604	TGG4
AT1G47960	716.541	283.838	1.33512	1.07e-14	356.861	1.00396	4.06139e-06	C/VIF1
AT1G48000	93.1148	31.0725	1.57918	5.94e-05	33.7713	1.46299	0.00367019	MYB112
AT1G48260	399.859	122.268	1.70883	1.13e-08	120.735	1.72609	8.01669e-09	CIPK17
AT1G48510	66.2783	10.3621	2.67711	0.000110568	6.28656	3.39186	1.83906e-05	-
AT1G48570	354.683	745.261	-1.07089	1.79e-07	769.125	-1.11634	2.62983e-06	-
AT1G48605	80.6661	26.0365	1.63062	3.24e-06	24.6843	1.7061	3.02498e-06	HAL3B
AT1G49390	48.2221	4.24342	3.49161	7.14e-06	6.57454	2.8678	0.0034012	-
AT1G49450	84.0717	18.1782	2.21181	1.61e-05	10.9832	2.93083	4.33074e-07	-
AT1G49900	117.721	21.6708	2.43969	1.45e-13	13.7089	3.1009	4.59704e-13	-
AT1G49960	250.267	30.5024	3.03322	2.2e-15	33.6763	2.89046	9.91478e-06	NAT4
AT1G51140	305.121	117.569	1.37621	8.51e-09	85.2287	1.83755	7.47017e-10	BHLH122
AT1G51340	403.434	142.019	1.50583	6.24e-06	154.995	1.37709	3.27295e-05	DTX42
AT1G51420	167.666	26.4052	2.66362	0.000551561	27.2373	2.61784	0.00103239	ATSPP1
AT1G51890	138.153	44.1639	1.644	0.000198197	37.4761	1.88139	0.000248404	-
AT1G52030	61.8681	1.97933	4.95854	3.01e-05	0.343544	7.4287	5.34821e-06	F-ATMBP
AT1G52342	256.987	91.1839	1.49525	1.26e-06	75.5455	1.76281	4.69785e-05	-
AT1G52400	1859.47	440.844	2.07655	0.00138189	230.271	3.01626	0.00184782	BGLU18
AT1G52410	500.439	187.575	1.41576	0.00203744	105.185	2.2523	0.000162484	TSA1
AT1G52560	19.2991	3.64456	2.39952	0.00426142	2.38329	3.03035	0.00208052	HSP26.5
AT1G52820	177.774	60.7097	1.54951	1.79e-05	67.0812	1.40329	0.0021315	-
AT1G52940	192.845	2.20391	6.441	0.00406135	0.343544	9.06983	1.19799e-05	PAP5
AT1G53100	28.2295	5.05394	2.48596	0.00108358	2.29786	3.60367	0.000123699	-
AT1G53270	59.7349	20.9205	1.51045	0.00047393	15.6303	1.92944	7.98607e-05	ABCG10
AT1G53310	3980.15	1639.28	1.27979	7.58e-05	1789.1	1.15452	0.00162949	PPC1
AT1G53470	187.642	64.7273	1.53493	1.35e-06	67.4989	1.47322	2.15386e-05	MSL4
AT1G53660	27.6319	7.63331	1.85143	0.00419514	6.28356	2.12779	0.0050746	-
AT1G53680	88.6807	14.142	2.64206	2.36e-06	27.609	1.67957	0.00649125	GSTU28
AT1G53830	141.182	17.8445	2.98162	2.43e-05	33.5604	2.07182	0.0027598	PME2
AT1G53920	112.443	38.6942	1.53814	3.59e-06	50.7596	1.14598	0.00229463	GLIP5
AT1G54020	61.9625	0.690161	6.50246	0.00494941	0.997767	5.9554	0.000141708	-
AT1G54095	68.6303	24.5355	1.47984	0.000164395	23.3597	1.55194	0.00092997	-
AT1G54540	76.5877	6.07276	3.63869	1.64e-05	8.57306	3.15123	6.65823e-05	-
AT1G55230	65.1545	4.58836	3.81447	5.78e-08	4.3179	3.91044	2.09479e-07	-
AT1G55240	157.729	24.1279	2.7057	7.9e-07	18.5687	3.08169	5.03102e-06	-
AT1G55320	184.628	60.9756	1.59672	0.000109649	59.0543	1.64219	0.00815479	AAE18
AT1G55490	3432.5	7196.62	-1.06802	4.32e-11	8085.95	-1.23613	2.12451e-12	CPN60B1
AT1G55740	184.965	72.5893	1.35142	1.02e-07	71.2372	1.37421	2.76186e-06	RFS1
AT1G55920	1126.87	556.298	1.01819	1.39e-06	548.149	1.03857	0.000818328	SAT1
AT1G56010	1060.22	395.394	1.4224	5.53e-07	448.366	1.23989	1.36937e-06	NAC021
AT1G56020	153.093	70.9539	1.10841	0.000146995	75.8138	1.01261	0.00520932	-
AT1G56050	190.902	385.463	-1.01351	4.21e-05	394.083	-1.04545	4.63126e-05	-
AT1G56320	151.358	21.533	2.80534	2.66e-08	18.1367	3.05554	1.24957e-06	-
AT1G56360	21.9298	0	6.89196	2.82e-05	0	6.88975	5.37961e-05	PAP6
AT1G56550	325.689	71.2267	2.19069	2.5e-05	72.0223	2.17396	0.000508028	RGXT3
AT1G56600	165.781	56.3327	1.55882	1.5e-09	35.2076	2.23778	7.56268e-06	GOLS2
AT1G57650	102.01	13.1822	2.95498	4.86e-05	5.34554	4.25572	2.00398e-09	-
AT1G58270	50.7208	2.32427	4.44168	2.65e-07	1.30009	5.25459	1.11806e-06	ZW9
AT1G58280	470.037	35.5536	3.71931	1.48e-14	38.8993	3.59315	3.55681e-08	-
AT1G58320	24.5818	0.629689	5.22075	7.57e-05	0.975067	4.62767	0.000208537	PCR9
AT1G59590	231.665	94.0161	1.29932	5.2e-07	93.3476	1.31096	2.76638e-07	ZCF37
AT1G59990	566.386	1241.37	-1.13191	4.47e-06	1379.75	-1.28396	6.01169e-06	RH22
AT1G60450	12.7794	34.763	-1.44335	0.00740077	43.6927	-1.7743	0.000202744	GOLS7
AT1G60470	128.206	14.0375	3.19068	3.59e-13	11.1177	3.51985	0.000119698	GOLS4
AT1G60970	44.1975	15.1625	1.5472	0.00267571	19.0867	1.21242	0.00553031	-
AT1G60989	376.343	97.4782	1.94689	1.04e-11	113.44	1.72814	9.23074e-06	SCRL7
AT1G61050	125.352	19.1338	2.70884	4.31e-05	22.5317	2.47273	0.00146563	-
AT1G61120	21.7825	0.659778	5.03545	0.00362594	0	6.88656	0.00171483	GES
AT1G61340	96.6586	30.9827	1.6365	5.1e-05	29.1122	1.73157	1.67839e-06	-
AT1G61360	706.545	309.979	1.18838	0.00113483	350.951	1.00825	0.00872565	-
AT1G61590	301.882	76.1937	1.98463	1.94e-05	78.5401	1.93934	0.00888979	PBL15
AT1G61820	459.396	173.034	1.40823	0.000128451	158.454	1.53443	0.00874324	BGLU46
AT1G61930	62.52	6.59881	3.23546	5.5e-08	13.6934	2.19027	0.00134646	-
AT1G62300	684.515	328.43	1.05943	0.000301914	314.456	1.12203	0.000687329	WRKY6
AT1G62370	168.372	27.441	2.61145	4.43e-07	35.1884	2.25536	3.59758e-05	-
AT1G62480	14839.5	3266.46	2.18358	1.27e-21	6509.67	1.18639	2.52606e-06	-
AT1G62570	794.556	125.239	2.66463	1.43e-14	161.357	2.29693	6.17033e-09	FMOGS-OX4
AT1G62660	2242.31	808.931	1.47059	2.41e-08	715.29	1.64703	9.19805e-05	BFRUCT3
AT1G62760	167.97	5.56313	4.91174	0.000103181	4.98765	5.07327	3.94173e-08	PMEI10
AT1G63005	8.86578	0.314845	4.62326	0.0041591	0.661395	3.72997	0.00901642	MIR399B
AT1G63245	30.4375	4.76962	2.68685	0.000140675	5.24158	2.52982	0.00599617	CLE14
AT1G63530	219.981	97.5312	1.17538	0.000134168	93.8997	1.22658	2.92531e-05	-
AT1G63720	232.02	110.74	1.06606	3.43e-07	104.354	1.15068	4.45879e-05	-
AT1G63840	391.53	172.539	1.18108	1.04e-06	174.927	1.16092	8.19985e-07	-
AT1G64060	773.899	339.872	1.18639	2.79e-06	362.246	1.09337	0.0026992	RBOHF
AT1G64200	1042.76	375.255	1.47359	2.25e-13	330.09	1.65822	2.24069e-08	VHA-E3
AT1G64210	99.0955	33.8147	1.54736	0.00278509	28.7609	1.78103	0.0031531	-
AT1G64360	288.2	138.984	1.05306	0.00791079	94.6262	1.60473	3.06587e-07	-
AT1G64380	69.0362	145.908	-1.08081	0.00221098	159.782	-1.2138	0.000483121	ERF061
AT1G64480	112.284	17.4093	2.68522	9.41e-05	17.2274	2.70016	0.00197171	CBL8
AT1G64590	1645.49	35.7043	5.51883	7.83e-52	44.5442	5.2049	4.68686e-22	-
AT1G64920	35.4512	4.01884	3.14192	0.000105443	4.96795	2.82914	0.0011101	UGT79B11
AT1G66020	49.6335	10.1397	2.29588	0.000195372	9.86299	2.32271	0.00351195	TPS26
AT1G66470	68.8885	10.8412	2.66352	0.00149523	10.5118	2.70714	0.00794932	BHLH83
AT1G66700	366.974	29.4061	3.64085	0.000729354	19.1518	4.26217	0.000624662	PXMT1
AT1G66860	52.541	5.40019	3.28498	0.00243383	2.98077	4.13744	0.000815318	-
AT1G67030	195.269	78.3838	1.31547	0.00423766	47.9044	2.0233	0.00448179	ZFP6
AT1G67100	16.3742	3.26895	2.31034	0.00830331	3.00347	2.44458	0.00289408	LBD40
AT1G67360	537.388	131.373	2.03118	2.42e-11	105.583	2.34762	2.10987e-08	-
AT1G67600	197.104	86.2365	1.19279	2.59e-06	81.5739	1.2729	2.08809e-06	-
AT1G67810	498.847	80.6505	2.62928	1.24e-06	97.1739	2.36026	7.42569e-05	SUFE2
AT1G67820	90.5091	34.0627	1.41293	0.000287955	34.7415	1.3796	0.000248202	-
AT1G67920	90.2045	16.8576	2.42437	1.13e-08	15.4051	2.54875	7.10961e-09	-
AT1G67980	77.9996	15.4172	2.34005	5.46e-06	13.1162	2.56942	0.00394288	CCOAMT
AT1G68450	62.7227	9.9269	2.65611	0.000330656	12.2379	2.35142	0.00087754	VQ8
AT1G68470	45.8549	17.2468	1.40719	0.00220461	17.0971	1.42407	0.00398368	GT17
AT1G68620	708.125	301.967	1.22967	3.77e-06	211.657	1.74208	3.15347e-09	CXE6
AT1G68765	25.8169	4.96352	2.37447	0.00549687	1.67351	3.94981	5.49009e-05	IDA
AT1G68825	21.6387	1.66464	3.69623	4.31e-05	2.67844	3.01367	0.000105362	DVL5
AT1G68850	192.992	31.2953	2.62141	8.33e-07	24.9921	2.9445	2.39477e-05	PER11
AT1G69200	329.977	715.681	-1.11667	0.000131867	936.014	-1.50293	2.0588e-07	FLN2
AT1G69480	115.833	37.1313	1.63814	5.59e-06	25.5919	2.17507	3.20413e-05	PHO1-H10
AT1G69790	103.087	22.5852	2.1876	4.94e-07	20.1753	2.34893	0.00170422	PBL18
AT1G69810	246.065	76.9997	1.67454	0.00328321	64.8688	1.92078	0.000818324	WRKY36
AT1G69880	173.034	16.2267	3.4192	1.45e-11	18.2096	3.24666	0.000208933	TRX8
AT1G69920	58.8074	7.34782	3.00047	0.000477514	1.98001	4.88048	1.55772e-08	GSTU12
AT1G69930	135.031	9.16378	3.88546	4.45e-06	0.325022	8.55613	1.07538e-08	GSTU11
AT1G70000	177.763	68.4023	1.37698	2.14e-08	71.9105	1.30347	2.49136e-05	-
AT1G70080	59.6223	2.63911	4.48578	3.94e-09	11.1918	2.40912	0.00647226	TPS06
AT1G70140	166.301	60.0497	1.46908	3.63e-07	78.7748	1.0776	0.00478715	FH8
AT1G70170	74.5736	14.425	2.36554	0.00157657	12.8581	2.52939	0.000656483	2MMP
AT1G70440	14.3965	1.91916	2.87869	0.0103741	1.01211	3.8391	0.00125164	SRO3
AT1G70690	444.095	135.761	1.70815	1.79e-07	137.904	1.6846	5.31622e-06	CRRSP2
AT1G70800	75.9153	21.0835	1.84514	0.00334327	22.6966	1.74145	0.00183959	CAR6
AT1G70810	216.08	93.4859	1.20805	0.00779932	79.5988	1.44141	0.00135707	CAR7
AT1G70880	345.001	51.8125	2.73182	2.22e-13	44.782	2.94072	1.44112e-06	-
AT1G70900	566.874	245.56	1.20629	9.69e-08	261.519	1.11597	2.16732e-07	-
AT1G70940	3433.19	8076.12	-1.23408	1.04e-24	8487.93	-1.30591	1.34473e-14	PIN3
AT1G71200	238.008	69.4607	1.7753	0.000103375	60.3937	1.97556	1.41599e-10	-
AT1G71520	20.334	2.41468	3.09334	0.00278157	2.33072	3.1205	0.000725233	ERF020
AT1G71692	136.502	27.5918	2.30128	8.24e-07	38.9375	1.80643	0.0028366	AGL12
AT1G71740	78.8824	9.83649	2.99878	0.000694405	12.9836	2.59835	0.00319709	-
AT1G72120	169.773	78.8564	1.1059	3.09e-05	47.5088	1.83421	0.00120751	NPF5.14
AT1G72210	77.0276	20.9815	1.87415	4.78e-07	14.2138	2.43405	0.000375629	BHLH96
AT1G72510	2263.33	916.29	1.30431	6.72e-07	849.15	1.4126	3.3852e-08	-
AT1G72520	141.9	36.3077	1.96637	0.00817284	21.1306	2.75249	0.000686964	LOX4
AT1G72590	12.1241	1.28947	3.20437	0.00778326	0	6.03493	0.000180217	PPRD1
AT1G72830	483.851	195.046	1.30956	4.94e-07	178.814	1.43422	2.98817e-05	HAP2C
AT1G72890	164.175	66.7541	1.29946	1.33e-05	50.6204	1.69841	2.93076e-09	-
AT1G73010	2152.21	60.5291	5.1512	7.12e-05	21.6433	6.63684	6.19275e-34	PS2
AT1G73220	586.657	7.13823	6.35381	1.17e-09	2.94372	7.61193	4.96997e-37	2022-10-01
AT1G73260	5017.14	652.768	2.94203	5.77e-08	555.114	3.17515	0.00285064	KTI1
AT1G73410	37.1717	5.68422	2.70876	3.96e-05	4.98647	2.89292	0.00164948	ATMYB54
AT1G73500	655.916	300.578	1.12562	1.7e-06	271.515	1.27183	1.43895e-05	MKK9
AT1G73805	173.105	49.2192	1.81544	0.00129258	36.8804	2.23266	8.34048e-10	SARD1
AT1G73810	227.324	29.6609	2.93473	1.32e-08	26.4003	3.10095	1.55613e-07	-
AT1G73860	71.6961	9.74652	2.86975	0.000132956	11.6094	2.62401	0.00251283	KIN14P
AT1G74010	210.631	65.056	1.6935	1.22e-06	78.724	1.4203	6.78877e-05	-
AT1G74020	1044.58	355.448	1.55477	9.41e-09	315.743	1.7257	1.34195e-07	SSL12
AT1G74200	75.0395	23.1545	1.69184	4.88e-05	21.8637	1.78161	2.07148e-05	AtRLP16
AT1G74210	531.871	131.733	2.01287	5.83e-10	176.747	1.58995	4.87478e-06	GDPD5
AT1G74360	315.4	110.015	1.51916	2.12e-05	105.35	1.58113	7.51269e-05	-
AT1G74458	208.466	53.1305	1.96976	9.86e-06	61.085	1.76657	0.00163504	-
AT1G74460	249.923	31.9115	2.96811	2.07e-08	43.029	2.53435	0.000262795	-
AT1G74500	103.763	8.45676	3.60738	2.76e-06	10.7813	3.26038	0.00248441	PRE3
AT1G74590	340.695	148.47	1.19668	1.29e-05	138.492	1.29607	5.70744e-05	GSTU10
AT1G75030	54.5107	11.2472	2.27191	7.67e-05	9.33542	2.54108	1.45965e-05	ATLP-3
AT1G75280	634.949	205.713	1.62679	5.84e-07	242.873	1.38575	8.19811e-05	-
AT1G76430	63.9999	4.27351	3.89255	3.82e-08	1.64363	5.26181	7.39519e-10	PHT1-9
AT1G76620	48.9043	109.186	-1.15869	0.000186134	111.712	-1.19282	0.0029554	-
AT1G76640	30.0551	0.659778	5.4979	0.000368007	1.66633	4.17433	0.00147037	CML39
AT1G76650	150.844	43.49	1.79097	2.07e-05	60.0967	1.32969	0.00285731	CML38
AT1G76690	311.342	95.6751	1.70076	6.34e-05	110.767	1.4877	0.000376143	OPR2
AT1G76790	826.4	181.877	2.18354	6.35e-11	205.516	2.00705	0.00107009	IGMT5
AT1G76930	8578.06	2422.7	1.82393	8.8e-26	3903.8	1.13619	0.00814663	ATEXT4
AT1G76980	135.311	63.646	1.08593	0.00201726	55.0303	1.29486	0.000677578	-
AT1G77120	829.042	91.2913	3.18301	9.72e-19	102.261	3.02093	8.64945e-12	ADH1
AT1G77450	237.172	106.161	1.15885	0.000273422	108.629	1.12425	0.00133668	NAC032
AT1G77520	659.85	93.2822	2.82204	0.0069518	128.352	2.35906	0.000363296	-
AT1G77885	382.792	148.684	1.36306	0.000503509	146.486	1.38289	0.00211038	-
AT1G78450	260.887	97.5762	1.41854	1.46e-10	103.655	1.33126	1.07959e-05	-
AT1G78780	276.68	119.15	1.21398	4.77e-05	113.976	1.27705	0.000205833	-
AT1G78850	3901.44	641.211	2.605	2.94e-15	846.088	2.20452	1.72099e-07	-
AT1G78990	153.236	21.4157	2.83943	2.25e-14	25.2657	2.59788	6.43806e-05	-
AT1G79310	169.376	54.463	1.63421	0.00109711	48.8077	1.79197	0.0028031	AMC7
AT1G79320	305.631	25.9106	3.55378	2.57e-09	55.9929	2.44518	0.00119782	AMC6
AT1G79450	273.286	78.461	1.79931	1.25e-06	92.5334	1.5598	0.00429427	ALIS5
AT1G79520	391.548	164.611	1.25013	2.98e-07	150.12	1.38044	6.7049e-06	-
AT1G79580	62.0157	5.15816	3.56436	2.2e-07	4.0114	3.94783	4.71204e-08	SMB
AT1G79680	64.7086	23.0197	1.49091	0.0077161	13.7686	2.23603	0.000128009	WAKL10
AT1G79900	106.042	35.243	1.58684	8.01e-06	38.8013	1.44743	0.00167055	BAC2
AT1G80710	23.9512	64.4583	-1.42998	0.000156249	71.6596	-1.58116	6.98977e-05	DRS1
AT1G80820	165.027	22.2227	2.8858	2.99e-08	16.5929	3.3098	6.13901e-09	CCR2
AT2G01422	113.391	254.776	-1.16763	0.00270445	613.144	-2.43364	2.81916e-10	-
AT2G01430	74.9488	21.7571	1.77886	0.00914893	16.9478	2.14034	0.000492095	ATHB-17
AT2G01830	1084.44	415.394	1.38392	3.11e-06	463.365	1.22385	0.00645763	AHK4
AT2G01880	305.999	23.6161	3.68887	1.92e-09	23.2003	3.71825	2.40357e-07	PAP7
AT2G01890	764.654	187.117	2.02985	2.38e-07	242.783	1.65297	0.00173742	PAP8
AT2G02990	73.5115	1.60431	5.47522	2.38e-10	0.993589	6.19825	8.60554e-10	RNS1
AT2G03200	162.862	16.3306	3.31672	2.26e-10	28.5942	2.50664	4.8152e-05	-
AT2G03360	49.8278	8.03931	2.63319	1.05e-06	15.3507	1.69616	0.000163497	-
AT2G03370	19.3379	1.25938	3.89865	0.00289242	1.33713	3.85146	0.00116243	-
AT2G04025	37.759	2.95396	3.66063	1.86e-06	1.96866	4.24201	1.66004e-06	RGF3
AT2G04100	209.859	46.7277	2.16244	2.8e-09	43.2644	2.27623	0.00201169	DTX6
AT2G04160	1427.87	563.216	1.34229	6.37e-05	586.562	1.28379	0.000121386	AIR3
AT2G04395	123.518	16.9006	2.86569	1.48e-09	10.1265	3.61444	8.55237e-13	POT1C
AT2G04530	180.506	375.993	-1.05847	0.000270237	437.358	-1.27536	2.10196e-05	TRZ2
AT2G04805	46.3911	5.50339	3.05956	0.000112927	7.8788	2.54814	0.00397285	-
AT2G05940	370.912	156.73	1.24195	0.000400223	173.984	1.09101	0.00136061	RIPK
AT2G06050	658.733	274.588	1.2623	0.000844039	247.652	1.41388	0.00102884	OPR3
AT2G08820	444.649	8.66738	5.68042	3.1e-07	8.33884	5.73378	1.06614e-43	-
AT2G10930	24.9698	4.42454	2.50745	0.00103701	6.69402	1.8976	0.00452402	-
AT2G11810	987.417	43.9201	4.48943	3.91e-06	16.8958	5.87507	2.2909e-20	MGD3
AT2G12646	70.3397	9.01231	2.96382	0.000471877	6.84399	3.35257	0.0035505	-
AT2G14210	44.2846	1.97933	4.47127	2.1e-07	4.31491	3.35147	2.32493e-06	ANR1
AT2G14820	89.3746	13.6751	2.70144	0.000179938	12.0742	2.88112	0.00606287	NPY2
AT2G15090	546.344	1179.25	-1.10995	3.57e-07	1261.81	-1.20791	1.08328e-06	KCS8
AT2G15220	169.401	13.7658	3.61208	3.05e-12	14.4946	3.53915	1.70247e-07	-
AT2G15370	124.097	5.56298	4.46694	1.82e-10	16.8283	2.87781	0.000913062	FUT5
AT2G15390	450.221	171.367	1.39352	4.43e-05	150.981	1.57593	7.269e-05	FUT4
AT2G16005	79.7415	13.4806	2.55926	9.69e-05	13.1574	2.59481	0.000473682	ROSY1
AT2G16060	1492.15	350.046	2.09169	1.75e-07	603.69	1.3081	0.00272448	AHB1
AT2G16230	38.3217	4.99347	2.93844	0.00171346	4.96795	2.94262	0.00353312	-
AT2G16660	327.136	819.117	-1.32417	8.06e-14	733.834	-1.16643	0.000108112	-
AT2G16760	104.028	12.446	3.05559	7.13e-07	13.9186	2.89672	1.02515e-05	-
AT2G16890	62.1051	25.8846	1.2598	0.00594262	14.6182	2.08098	0.000128702	UGT90A1
AT2G16980	277.856	36.8461	2.91211	5.08e-16	54.8798	2.33767	0.00549701	-
AT2G16990	334.769	164.158	1.0271	0.000566992	108.152	1.6267	0.000534897	-
AT2G17230	863.089	1798.33	-1.05888	1.38e-08	2105.63	-1.28592	0.000187088	EXL5
AT2G17280	174.4	31.5996	2.46325	5.46e-08	58.6755	1.57269	0.00186173	PGM
AT2G17500	2101.97	373.578	2.49187	2.09e-16	513.356	2.03146	4.76099e-06	PILS5
AT2G17850	32.6044	0.944534	5.06309	0.000307026	1.31861	4.62216	0.000506618	-
AT2G17890	20.6104	0.974622	4.37345	0.000126997	1.66216	3.62698	0.000428066	CPK16
AT2G18100	94.2073	41.7082	1.17448	0.000254646	38.0031	1.30668	0.000842764	-
AT2G18130	21.2211	0.689866	4.97636	0.000208316	0.325022	5.88409	5.88451e-05	PAP11
AT2G18210	118.993	30.6827	1.95455	4.3e-05	25.3386	2.2268	0.00617239	-
AT2G18450	39.9162	4.24357	3.21858	2.37e-05	7.95707	2.32262	0.000783948	SDH1-2
AT2G18680	42.6437	13.9167	1.61114	0.00152416	14.9845	1.50581	0.00191915	-
AT2G19130	480.266	236.186	1.02287	2.87e-06	221.126	1.11812	8.55779e-08	-
AT2G19410	41.9161	1.94924	4.39976	3.04e-07	3.61229	3.52622	0.000189358	-
AT2G19890	105.077	6.91306	3.91383	2.76e-14	2.67127	5.29583	2.43341e-16	-
AT2G19970	26.2828	6.08903	2.11623	0.00220078	4.02992	2.70486	0.00262575	-
AT2G20030	38.0158	8.86246	2.0911	0.000448028	8.99905	2.07633	0.000206952	ATL12
AT2G20080	124.659	13.6149	3.18465	4.71e-07	21.6851	2.51983	0.00518966	SPEAR1
AT2G20515	148.078	40.2074	1.87807	4.84e-09	48.739	1.60088	0.00168364	-
AT2G20550	114.615	51.4142	1.15597	0.00127092	51.4252	1.15401	0.000818353	-
AT2G20560	326.304	152.479	1.09724	9.22e-07	134.306	1.28001	2.15567e-07	-
AT2G20835	8.84188	81.3348	-3.20005	2.61e-12	75.0568	-3.08463	7.53307e-12	-
AT2G21100	126.148	10.2718	3.6152	2.7e-07	19.5653	2.68472	0.00676532	DIR23
AT2G21200	10.5115	47.7515	-2.18613	1.79e-05	28.3851	-1.43619	0.00709897	-
AT2G21210	25.6724	121.254	-2.24115	1.94e-07	113.129	-2.14416	2.53684e-06	-
AT2G21370	76.4274	220.096	-1.52559	1.15e-12	157.221	-1.04106	3.7264e-06	XK-1
AT2G21900	14.6361	1.00486	3.86689	0.00424932	0.336372	5.35054	0.00191759	WRKY59
AT2G21910	10.0717	54.459	-2.43237	0.00300143	88.1388	-3.12347	0.00026613	CYP96A5
AT2G22470	717.716	92.5559	2.95384	3.44e-11	220.87	1.69826	0.00448769	AGP2
AT2G22510	289.095	50.5536	2.51588	3e-08	41.2958	2.80442	0.000143486	-
AT2G22920	126.625	32.9037	1.94536	1.9e-05	29.3984	2.10354	0.00614948	SCPL12
AT2G22930	48.7768	7.72358	2.66203	2.32e-06	8.62863	2.49627	0.0011775	UGT79B8
AT2G22970	217.427	92.8584	1.22625	0.00104886	93.7707	1.21152	0.00290241	SCPL11
AT2G23010	29.9561	6.08947	2.30352	0.00909088	2.03557	3.89214	0.000489414	SCPL9
AT2G23030	697.222	307.728	1.17907	0.000135575	262.577	1.40608	0.000744583	SRK2J
AT2G23050	152.102	17.9489	3.0754	3.53e-08	21.1719	2.84271	0.00236284	NPY4
AT2G23060	38.8069	11.2045	1.79857	0.00253857	7.01487	2.46386	0.000383178	-
AT2G23400	22.3614	0.314845	5.95781	2.9e-05	1.31861	4.06656	0.000197042	-
AT2G23540	718.367	80.1683	3.16247	3.89e-13	115.844	2.63032	6.40144e-05	-
AT2G23630	89.0987	1.88907	5.50348	1.85e-10	15.5025	2.51941	0.00182786	sks16
AT2G23910	75.1149	36.6535	1.03349	0.00116803	32.3027	1.21474	0.00225005	-
AT2G24000	11.1608	0	5.91726	0.000251392	0.325022	4.95241	0.00140788	SCPL22
AT2G24070	96.8056	37.8968	1.34885	0.00114572	45.7475	1.079	0.00308767	QWRF4
AT2G24260	624.277	276.648	1.17392	8.24e-07	210.853	1.56321	5.13536e-05	BHLH66
AT2G24430	139.048	31.0379	2.15953	0.00312043	35.3468	1.97175	0.0016271	ANAC038
AT2G24610	163.22	22.3122	2.86815	0.000167764	28.4305	2.51724	0.00158356	ATCNGC14
AT2G24850	51.4025	0.629689	6.28514	1.77e-06	0	8.1223	4.47282e-08	TAT3
AT2G25150	160.391	1.25938	6.92982	6.98e-13	8.1626	4.29327	0.00682499	SCT
AT2G25160	363.04	17.5434	4.36836	3.95e-05	44.7784	3.01718	9.18483e-05	CYP82F1
AT2G25625	604.041	251.9	1.26167	0.000266857	195.505	1.62742	1.10488e-07	-
AT2G25770	104.233	373.793	-1.84288	1.25e-17	401.313	-1.94488	1.26759e-07	-
AT2G25940	311.507	66.6426	2.22193	1.61e-09	74.2025	2.06699	5.11611e-06	ALPHA-VPE
AT2G25980	315.89	31.6997	3.31616	0.00135746	45.1363	2.80387	0.000612851	JAL20
AT2G26290	180.677	25.9875	2.79389	6.24e-07	41.9613	2.10337	0.00498065	PBL12
AT2G26310	145.071	51.7856	1.48612	5.9e-06	59.485	1.2858	0.000883877	FAP2
AT2G26355	160.091	62.298	1.36003	0.00166469	46.7488	1.77413	9.07507e-05	-
AT2G26400	168.787	7.72417	4.45127	2.33e-08	5.68491	4.89429	2.65433e-07	ARD
AT2G26480	38.0822	2.60932	3.84705	2.97e-06	3.69473	3.36561	4.75996e-06	UGT76D1
AT2G26530	231.173	95.815	1.26948	0.000236649	53.4804	2.11192	7.76757e-07	AR781
AT2G26560	2170.29	659.248	1.71905	0.00721261	541.77	2.00486	0.000115473	PLP2
AT2G26660	857.959	408.143	1.0717	9.57e-14	401.01	1.09731	4.83568e-13	SPX2
AT2G27000	154.951	39.0034	1.98608	4.55e-05	44.1929	1.80643	0.000135899	CYP705A8
AT2G27190	2744.49	1280.12	1.10024	8.88e-09	1315.49	1.06106	6.07862e-08	PAP12
AT2G27370	182.199	13.9898	3.69607	2.01e-07	30.3765	2.5809	0.00499117	CASP3
AT2G28110	545.772	154.65	1.81844	2.03e-17	141.499	1.94557	1.43238e-09	IRX7
AT2G28250	247.734	84.083	1.55832	0.00138295	98.7219	1.32513	0.0038786	NCRK
AT2G28605	102.575	225.943	-1.13872	8.82e-08	230.588	-1.1685	0.000172357	PPD2
AT2G28990	23.9038	4.93388	2.26735	0.00298699	4.68415	2.35076	0.00280957	-
AT2G29060	348.245	117.818	1.56374	9.44e-10	139.694	1.3157	1.59436e-05	SCL33
AT2G29330	212.319	53.8332	1.97734	0.000231935	54.2793	1.96375	0.00869112	TRI
AT2G29460	675.077	187.61	1.84761	0.000139183	113.939	2.56845	8.77782e-05	GSTU4
AT2G29500	315.274	32.8472	3.26289	0.00708667	23.4864	3.7508	0.00384001	HSP17.6B
AT2G29740	244.981	68.0689	1.84646	1.27e-06	101.79	1.2673	0.000736465	UGT71C2
AT2G30340	114.814	19.6736	2.53996	2.38e-05	19.8389	2.52935	0.00117986	LBD13
AT2G30540	177.407	65.5748	1.43844	1.58e-05	47.0923	1.91329	3.52166e-09	GRXS9
AT2G30840	268.562	88.7594	1.59593	0.00059019	87.9072	1.60874	0.000582002	-
AT2G31020	391.472	142.921	1.45271	0.00295357	124.006	1.65678	0.0070192	ORP1A
AT2G31230	110.4	25.57	2.10839	5.44e-06	33.5609	1.71842	0.000888454	ERF15
AT2G31540	25.5987	0.314845	6.15311	5.26e-06	0.975067	4.68193	2.76911e-05	-
AT2G31865	260.305	83.5648	1.63934	1.02e-08	65.664	1.98674	1.12165e-09	PARG2
AT2G32140	53.6234	6.50795	3.02739	4.41e-06	11.0388	2.28137	2.07587e-05	-
AT2G32190	140.196	36.5935	1.93675	7.12e-06	51.5124	1.44659	0.0011061	-
AT2G32300	233.053	34.5805	2.74785	1.81e-07	46.5971	2.31955	0.00212674	UCC1
AT2G32510	47.0242	9.92749	2.23871	0.000215823	13.774	1.76951	0.001191	MAPKKK17
AT2G32610	35.6646	3.9594	3.16352	0.000123858	5.29415	2.74614	0.000669916	CSLB1
AT2G32620	15.7207	0.314845	5.44999	0.000367266	1.66216	3.2358	0.00526855	CSLB2
AT2G32660	167.759	59.0929	1.50646	2.65e-05	71.1105	1.23874	0.00114113	AtRLP22
AT2G32830	160.595	5.50295	4.8406	5.9e-18	2.68562	5.90445	4.9879e-21	PHT1-5
AT2G32960	521.526	95.5561	2.44715	5.36e-12	107.073	2.28273	6.56897e-08	DSP2
AT2G33205	153.914	36.3359	2.08189	4.21e-06	35.7047	2.1051	0.000687858	-
AT2G33580	194.711	81.7967	1.25218	1.67e-06	95.7231	1.02379	8.37851e-06	LYK5
AT2G34020	101.743	15.2352	2.73708	7.89e-05	16.8068	2.59257	0.000209064	-
AT2G34202	13.7879	0	6.22228	0.000821885	0	6.22325	0.00131804	MIR399D
AT2G34210	168.449	24.5792	2.77842	1.28e-06	12.1035	3.80258	1.18781e-22	-
AT2G34350	109.865	20.5275	2.41558	0.000813755	21.4796	2.35081	0.000785881	-
AT2G34500	392.691	112.897	1.79889	1.68e-05	134.039	1.54955	0.000763288	CYP710A1
AT2G34810	113.126	37.0419	1.60936	0.00531885	22.8286	2.31314	0.000180484	-
AT2G34940	74.7562	18.1437	2.03581	0.00283477	18.0925	2.04218	0.00836071	VSR5
AT2G35000	247.146	54.4015	2.18201	0.00105653	55.7903	2.14322	0.00368059	ATL9
AT2G35380	328.76	33.2753	3.30029	3.46e-14	46.8367	2.80797	3.81207e-05	PER20
AT2G35585	170.786	56.2755	1.59878	0.00602313	54.4239	1.64649	0.00143253	-
AT2G35730	59.6524	11.3811	2.38014	0.000327555	13.2697	2.16364	0.000102268	-
AT2G35810	642.655	269.789	1.25121	5.66e-07	253.979	1.33796	1.39486e-05	-
AT2G35910	230.219	104.21	1.1416	0.000476177	102.883	1.15913	0.000458571	ATL70
AT2G35930	245.013	90.0861	1.44259	1.31e-05	87.0659	1.49292	1.86026e-05	PUB23
AT2G36380	3839.93	1347.55	1.51057	4.48e-07	1299.61	1.56177	8.09138e-08	ABCG34
AT2G37025	415.489	1083.55	-1.38289	3.47e-09	1008.34	-1.27872	0.000172532	TRFL8
AT2G37030	5.27569	47.8891	-3.186	2.95e-07	29.9223	-2.50925	0.000946724	-
AT2G37040	2191.64	490.136	2.16048	5.21e-15	680.647	1.68559	9.69211e-05	PAL1
AT2G37130	7660.42	2554.31	1.58441	4.5e-12	2155.6	1.82814	9.57334e-08	PER21
AT2G37290	91.536	33.1907	1.46481	9.89e-06	22.4259	2.02468	0.00129764	-
AT2G37440	111.329	9.4917	3.54252	2.3e-08	13.6593	3.02367	0.000560667	IP5P8
AT2G37700	35.372	0.629689	5.73751	1.37e-06	7.3369	2.26698	8.5585e-05	-
AT2G37750	1438.42	273.912	2.39237	0.00150665	240.904	2.57604	0.00349373	-
AT2G37970	100.955	30.8788	1.70586	7.3e-07	24.115	2.06182	0.000221063	SOUL-1
AT2G37980	190.654	36.6788	2.37308	2.34e-07	34.8276	2.45038	2.12578e-07	OFUT19
AT2G38010	169.805	52.914	1.6827	3.43e-05	71.2253	1.25349	0.0065004	-
AT2G38060	53.4468	6.65854	3.00186	1.43e-07	6.30508	3.07893	0.00028064	PHT4;2
AT2G38100	22.5819	1.97963	3.50172	0.000316892	4.63993	2.27774	0.00826808	-
AT2G38240	117.567	0.34508	8.35256	0.000381915	0.325022	8.35713	0.000383769	ANS
AT2G38340	18.6683	2.32456	3.00131	0.00307664	1.31144	3.81819	0.00233169	DREB2E
AT2G38390	827.464	84.9307	3.28355	7.03e-05	82.1715	3.33153	0.00455847	PER23
AT2G38720	13.7318	37.06	-1.43129	0.00980869	43.639	-1.66605	0.00273034	MAP65-5
AT2G38740	469.037	116.647	2.00705	1.71e-11	109.722	2.095	3.55721e-08	SGPP
AT2G38940	3069.6	288.759	3.40987	1.37e-05	305.813	3.32671	8.54787e-10	PHT1-4
AT2G39030	248.104	1.0348	7.91616	0.000306325	0	10.395	3.84947e-05	NATA1
AT2G39050	421.484	71.8049	2.55164	2.2e-18	77.1755	2.44716	3.99898e-05	EULS3
AT2G39310	4655.65	1454.09	1.67873	6.05e-12	1020.56	2.18817	0.0063931	JAL22
AT2G39330	273.037	6.02856	5.50145	2.48e-05	8.04968	5.08826	7.33287e-08	JAL23
AT2G39420	411.653	123.797	1.731	5.84e-10	130.491	1.65587	0.00029959	-
AT2G39430	304.872	29.3473	3.37308	8.28e-13	51.9707	2.54962	9.26587e-06	DIR9
AT2G39490	20.2989	1.25938	3.96067	0.000639719	0.661395	4.92647	8.78933e-05	-
AT2G39510	362.068	50.5737	2.84195	1.62e-14	98.6771	1.87275	5.43038e-06	-
AT2G39518	142.708	28.7642	2.31098	6.11e-07	40.387	1.82127	0.00193334	-
AT2G40100	52.4638	21.689	1.27954	0.00628152	25.1348	1.06151	0.00412122	LHCB4.3
AT2G40110	65.3966	23.3046	1.48695	0.00240868	26.086	1.32284	0.00256663	-
AT2G40113	45.3042	4.90335	3.19709	0.000172409	8.32213	2.44023	0.00774481	-
AT2G40370	138.319	22.2385	2.6351	9.4e-06	19.9841	2.78725	2.05829e-06	LAC5
AT2G40670	126.876	56.6902	1.16125	2.38e-05	53.4063	1.24933	0.000182597	ARR16
AT2G40900	614.223	234.33	1.39012	6.71e-07	285.114	1.10448	0.00107944	-
AT2G41310	577.636	261.747	1.14129	4.16e-06	262.985	1.13262	0.00129053	ARR8
AT2G41780	192.254	62.7013	1.61413	8.74e-07	73.89	1.37644	0.00152431	-
AT2G42350	114.209	21.2779	2.41885	3.19e-05	28.0881	2.02034	0.00117517	ATL40
AT2G42660	43.3337	4.58836	3.22787	3.62e-05	8.25222	2.38482	0.00100649	-
AT2G42800	69.9665	168.223	-1.26606	0.000924194	253.577	-1.8594	0.000508466	AtRLP29
AT2G42850	231.868	42.0081	2.46589	1.71e-09	88.8523	1.38147	0.00125032	CYP718
AT2G43000	75.3689	21.0699	1.83891	0.00401961	12.5856	2.57752	0.000115031	JUB1
AT2G43445	21.3292	84.7386	-1.99089	1.5e-07	82.5974	-1.95367	5.45721e-08	-
AT2G43510	324.625	119.16	1.44565	5.51e-07	61.8408	2.39386	6.06879e-13	ATTI1
AT2G43535	1409.28	97.8558	3.8448	4.68e-82	57.4991	4.61362	4.5408e-19	ATTI4
AT2G43670	68.0002	22.8688	1.56945	0.00284548	12.7954	2.40336	0.0024156	-
AT2G43880	75.141	7.63331	3.29318	1.45e-11	15.1775	2.30324	0.00296419	-
AT2G43920	592.672	108.882	2.4443	5.33e-12	96.5213	2.6179	1.45386e-11	HOL2
AT2G44010	233.288	58.599	1.99088	0.00136906	57.5923	2.01562	0.00650335	-
AT2G44450	449.058	78.8355	2.50706	1.61e-14	102.651	2.12785	0.000670404	BGLU15
AT2G44460	49.7184	1.6344	4.90507	6.07e-08	0.687089	6.20788	4.36646e-07	BGLU28
AT2G44798	60.1915	6.56872	3.19061	0.000571587	6.36601	3.24619	0.000367879	-
AT2G44940	256.574	85.5735	1.58206	5.02e-08	79.7398	1.68391	5.72281e-06	ERF034
AT2G44990	112.578	5.4733	4.34833	2.42e-06	11.6291	3.27446	2.12237e-05	CCD7
AT2G45040	41.0806	6.25343	2.7053	1.69e-05	8.73259	2.23364	0.00197772	4MMP
AT2G45130	469.274	18.6988	4.64353	2.57e-17	3.67621	6.99602	2.00473e-33	SPX3
AT2G45135	133.777	6.16287	4.42141	4.34e-12	5.33837	4.64675	1.40547e-14	-
AT2G45220	1115.8	71.8722	3.95551	2.51e-08	74.9786	3.89418	3.48206e-13	PME17
AT2G45510	945.373	322.153	1.55271	3.82e-07	288.442	1.71123	2.05257e-05	CYP704A2
AT2G46130	10.4941	0.659778	3.97762	0.00406771	0.650045	3.98294	0.00634269	WRKY43
AT2G46430	252.35	91.1914	1.46848	0.00907296	66.1163	1.93256	1.4839e-05	CNGC3
AT2G46680	1924.39	609.953	1.65728	3.02e-13	519.977	1.88603	2.61758e-08	ATHB-7
AT2G46740	259.269	35.8818	2.84788	1e-06	47.1539	2.45731	1.3994e-06	GULLO5
AT2G46850	30.8285	3.52347	3.10608	0.000822607	4.96795	2.62782	0.00463686	-
AT2G46860	99.4926	2.6692	5.21881	1.7e-08	9.88032	3.3284	0.00220765	PPA3
AT2G46880	127.778	3.49338	5.18585	0.00937261	0.325022	8.47697	0.000122993	PAP14
AT2G46940	96.0941	24.8057	1.9551	1.29e-07	24.8331	1.94774	7.65e-05	-
AT2G47000	4664.51	1888.89	1.30417	4.07e-06	1610.89	1.53439	1.74377e-08	ABCB4
AT2G47190	207.253	77.4147	1.4205	0.00217146	48.2436	2.10337	0.000237524	ATMYB2
AT2G47460	27.8939	1.66449	4.06261	1.19e-05	3.30579	3.06777	0.000831995	MYB12
AT2G47520	162.629	17.1111	3.24939	2.89e-05	13.1072	3.63812	4.78963e-06	ERF071
AT2G47800	1529.63	534.898	1.51578	1.09e-07	632.042	1.27437	0.00177246	ABCC4
AT2G47950	81.8819	4.93358	4.03901	9.92e-12	4.94942	4.03764	3.14557e-07	-
AT2G48130	340.42	44.1928	2.94442	1.01e-08	59.7049	2.50846	0.000792974	-
AT2G48140	324.829	40.3686	3.0061	5.83e-11	46.1036	2.81337	3.05926e-07	EDA4
AT2G48150	16.7297	3.32927	2.326	0.00374579	1.31861	3.65054	0.000683149	GPX4
AT3G01080	51.4265	6.37334	3.01429	1.32e-05	8.39141	2.61789	1.1086e-06	WRKY58
AT3G01175	71.8696	14.2924	2.32681	4.17e-07	15.2611	2.23145	2.3679e-05	-
AT3G01290	9049.16	3202.84	1.49835	4.04e-08	3938.56	1.199	4.15475e-06	HIR3
AT3G01513	69.2736	9.05651	2.92267	4.18e-05	8.35917	3.0485	7.67525e-06	-
AT3G01835	14.468	1.38032	3.41021	0.00971757	2.68979	2.42825	0.00776607	-
AT3G01990	162.814	45.3796	1.8425	1.83e-06	45.0156	1.8517	0.000232171	ACR6
AT3G02040	5078.42	1219.61	2.05799	4.47e-14	1432.17	1.82691	7.97736e-12	GDPD1
AT3G02410	28.5853	78.0299	-1.45074	0.000211695	72.5073	-1.34425	0.000974733	ICMEL2
AT3G02800	87.5163	37.1331	1.2334	0.000245731	41.2856	1.08171	0.00191619	DSP3
AT3G02870	520.03	201.84	1.36587	3.07e-07	239.789	1.11712	0.000259565	VTC4
AT3G02980	125.28	57.664	1.11816	4.54e-05	57.2194	1.12982	3.37616e-05	MCC1
AT3G03270	1477.46	340.98	2.11572	3.19e-11	420.674	1.81333	5.92396e-13	-
AT3G03310	934.289	443.494	1.07485	1.35e-14	336.407	1.47256	3.7148e-15	LCAT3
AT3G03450	133.032	41.2419	1.68741	6.52e-07	50.7423	1.3874	7.8678e-05	RGL2
AT3G03500	78.1222	19.8681	1.96952	0.00262953	17.1832	2.1805	0.00584981	-
AT3G03520	702.625	242.017	1.53702	1.06e-08	286.072	1.29498	0.00257751	NPC3
AT3G03530	810.891	22.4608	5.17064	4.18e-07	15.518	5.70288	3.48631e-27	NPC4
AT3G03650	106.864	16.8397	2.66265	5.95e-05	17.4855	2.60689	0.00763803	EDA5
AT3G03660	64.715	6.16287	3.37266	7.25e-08	16.9735	1.92734	0.00262508	WOX11
AT3G04060	296.486	129.451	1.19415	2.62e-05	102.947	1.52372	5.53914e-08	anac046
AT3G04360	82.8009	11.9375	2.7886	9.69e-10	10.228	3.00971	2.51411e-05	-
AT3G04370	28.5109	5.87797	2.26627	0.00259073	4.3179	2.71894	0.00187915	CRRSP39
AT3G04530	325.637	60.9672	2.41602	0.00946353	63.4893	2.35593	0.000153632	PPCK2
AT3G04720	9226.95	1588.03	2.53858	1.05e-06	1323.69	2.8034	0.00115062	HEL
AT3G05155	32.8476	8.17244	1.99693	0.00431151	4.62858	2.81699	0.000227888	-
AT3G05190	75.1978	34.6616	1.11974	0.00177442	36.2967	1.04735	0.00785069	-
AT3G05390	93.373	26.6943	1.80579	3.49e-06	18.6685	2.32151	0.0012643	-
AT3G05400	323.196	67.8467	2.25029	2.29e-16	107.691	1.586	0.00592064	SUGTL5
AT3G05630	804.47	105.959	2.92425	0.000187909	77.1133	3.38435	1.29476e-17	PLPZETA2
AT3G05690	485.89	148.677	1.70695	2.27e-11	123.195	1.97774	1.3204e-05	UNE8
AT3G06035	187.995	58.1556	1.69037	2.86e-05	75.9082	1.30649	0.00297436	-
AT3G06390	682.365	83.5969	3.02842	0.000632396	105.881	2.68507	0.00354225	-
AT3G06460	58.7145	4.12307	3.80617	2.77e-05	6.59306	3.14803	0.000418356	-
AT3G06730	180.132	393.087	-1.1252	1.26e-07	400.041	-1.15047	5.22978e-07	CITRX
AT3G06955	12.7969	0.974622	3.68695	0.0020719	0.650045	4.26745	0.00207504	-
AT3G07900	67.9685	10.242	2.72566	3.77e-05	13.2058	2.35737	0.00131434	OFUT24
AT3G08720	877.018	425.793	1.04223	1.64e-05	370.215	1.24437	9.99309e-09	ATPK2
AT3G08860	1046.42	130.913	2.99679	3.19e-18	88.8154	3.55751	0.000540497	PYD4
AT3G09010	120.434	44.855	1.42348	0.000289377	41.6082	1.53242	0.0005006	-
AT3G09020	194.422	50.0888	1.95633	1.14e-07	41.7857	2.21601	4.03386e-05	-
AT3G09400	46.7679	1.94924	4.55899	2.61e-07	0.679917	6.12286	4.28837e-07	PLL3
AT3G09405	97.4747	34.3867	1.5031	0.0038175	26.6548	1.87029	1.71867e-05	PAE4
AT3G09490	110.707	37.941	1.5439	0.000472317	35.5816	1.63586	0.000840938	-
AT3G09790	83.7733	29.1695	1.5227	0.000698389	22.8507	1.87077	0.00269296	UBQ8
AT3G09910	98.5359	27.5201	1.83617	9.33e-07	32.2859	1.6069	0.00153585	RABC2B
AT3G09922	1970.61	83.5754	4.55876	0.000130496	27.1883	6.17837	4.03632e-40	IPS1
AT3G10320	288.48	54.3173	2.40622	5.48e-13	60.2002	2.25932	1.21584e-10	-
AT3G10340	387.608	93.9545	2.04305	5.14e-11	132.183	1.54938	0.00130955	PAL4
AT3G10815	67.3166	13.4818	2.31167	5.29e-06	16.9603	1.98507	7.35051e-05	-
AT3G10910	214.018	73.5865	1.53961	0.00075201	79.6519	1.42246	0.00265026	ATL72
AT3G11430	138.461	21.8175	2.65914	3.2e-06	15.6477	3.14174	6.52142e-10	GPAT5
AT3G11840	203.381	70.8159	1.52164	2.48e-06	60.7624	1.73961	2.67663e-05	PUB24
AT3G12040	98.438	47.3014	1.0556	0.000336302	49.0688	1.00212	0.00176215	MAG
AT3G12500	2529.36	94.1557	4.74657	2.49e-14	94.7171	4.73835	2.14585e-06	CHI-B
AT3G12520	543.436	132.575	2.03399	2.11e-24	139.769	1.95766	8.81665e-08	SULTR4;2
AT3G13090	78.4846	20.0958	1.96639	0.000165411	20.9257	1.90553	0.000327881	ABCC6
AT3G13100	180.048	68.8692	1.38671	1.3e-06	81.0464	1.15122	0.000841282	ABCC7
AT3G13110	2263.46	729.963	1.63267	2.22e-09	802.154	1.49729	6.84424e-06	SAT3
AT3G13310	2297	960.131	1.2582	2.62e-09	855.6	1.42314	1.14601e-19	-
AT3G13380	1396.14	542.096	1.36483	3.15e-07	391.318	1.83431	1.92071e-19	BRL3
AT3G13435	79.1734	10.2858	2.93322	0.000208222	12.499	2.6578	0.0080342	-
AT3G13672	28.1638	5.93859	2.23969	0.00456817	6.01828	2.22783	0.00447127	-
AT3G13782	130.538	50.9415	1.35395	0.00121462	49.8521	1.38621	0.00292114	NAP1;4
AT3G13790	1911.28	648.503	1.5592	8.38e-06	902.8	1.08105	0.00209896	CWINV1
AT3G13950	60.6173	7.82707	2.9443	0.000192293	5.25592	3.51937	9.95894e-05	-
AT3G14060	232.944	72.0265	1.69097	0.000107756	46.6174	2.31879	1.06802e-06	-
AT3G14185	64.373	7.66355	3.06748	9.62e-10	14.8937	2.10725	0.00156123	-
AT3G14280	258.962	78.4389	1.72187	0.00562514	50.2321	2.36239	0.000244587	-
AT3G14450	54.8355	151.336	-1.46503	1.08e-05	129.678	-1.24407	9.21838e-05	CID9
AT3G14510	37.8404	5.3384	2.8243	0.00111712	2.34924	4.00856	4.84578e-06	-
AT3G14540	35.769	1.03524	5.14623	7.26e-07	4.58736	2.95337	0.00309778	TPS19
AT3G14700	48.0907	17.7123	1.44136	0.00180146	11.3226	2.0853	0.000245438	-
AT3G14900	147.211	356.097	-1.27413	2.26e-05	419.105	-1.50835	5.02394e-06	-
AT3G14940	7106.04	1119.76	2.66579	0.00260593	1088.09	2.70582	0.0035248	PPC3
AT3G15240	252.435	37.6819	2.7429	0.00565479	34.4106	2.87199	0.000126522	-
AT3G15540	249.38	534.322	-1.09923	0.000474101	670.883	-1.42848	1.20978e-05	IAA19
AT3G15950	5444.26	2345.98	1.21438	2.43e-08	2156.99	1.33475	0.00704338	NAI2
AT3G15990	370.76	136.288	1.44426	5.1e-12	163.865	1.17631	0.00171876	SULTR3;4
AT3G16030	332.076	155.18	1.09687	0.00499847	137.192	1.27292	0.000586623	CES101
AT3G16120	187.421	66.1292	1.50353	0.000308569	40.375	2.21583	2.96284e-06	-
AT3G16390	110.237	14.7406	2.89509	2.79e-07	7.93019	3.79107	8.30359e-06	NSP3
AT3G16400	9550.68	3057.88	1.64292	3.67e-15	3136.59	1.60513	0.00120403	NSP1
AT3G16420	11464.1	3989.43	1.52277	5.21e-14	4585.34	1.32164	0.00351481	PBP1
AT3G16430	801.518	275.892	1.53785	4.11e-05	227.268	1.81671	0.00328447	PBP2
AT3G16440	144.953	7.76748	4.20228	3.44e-13	23.0963	2.64684	0.00229042	ATMLP-300B
AT3G16460	2977.55	922.795	1.68975	1.69e-09	1076.54	1.46637	0.00335114	JAL34
AT3G16470	4129.4	1940.52	1.08951	4.59e-07	1267.11	1.70508	9.59851e-06	JAL35
AT3G16670	2233.88	644.98	1.79248	4.14e-11	1077.24	1.05279	0.00550268	-
AT3G17790	3133.03	542.422	2.53006	0.000651339	343.708	3.18855	4.86503e-36	PAP17
AT3G18170	324.952	130.73	1.31261	6.82e-07	151.827	1.0965	2.09593e-05	-
AT3G18400	129.962	38.4817	1.75277	4.43e-07	39.391	1.71921	0.00800037	anac058
AT3G18950	104.778	51.4122	1.02699	0.00365789	40.2723	1.37916	0.00126557	-
AT3G19390	1369.68	647.695	1.08028	1.64e-09	381.739	1.84181	1.18295e-14	RD21C
AT3G19450	1066.18	317.11	1.74905	6.19e-10	389.666	1.45082	0.000118836	CAD4
AT3G19580	284.49	114.598	1.31138	2.61e-08	79.141	1.84314	1.75543e-12	AZF2
AT3G19660	349.474	112.107	1.63826	7.08e-05	111.392	1.64687	0.00136112	-
AT3G20160	16.0427	0	6.44108	2.27e-05	1.35566	3.57478	0.0019966	-
AT3G20460	99.2963	9.52253	3.37628	5.08e-06	15.2868	2.69601	0.000328084	-
AT3G20840	71.1462	10.7073	2.73259	3.21e-06	3.30579	4.41629	1.17983e-09	PLT1
AT3G20940	141.077	15.2214	3.21517	3.49e-06	17.1461	3.03605	5.77822e-05	CYP705A30
AT3G20960	301.464	121.859	1.30462	0.000104445	104.94	1.52021	6.9451e-05	CYP705A33
AT3G21230	428.315	125.136	1.77532	4.69e-10	144.521	1.56567	0.000124312	4CL4
AT3G21240	878.75	170.971	2.36078	1.09e-10	278.52	1.65593	0.00262324	4CL2
AT3G21320	28.8279	250.37	-3.1179	2.63e-31	159.324	-2.46565	5.87286e-07	-
AT3G21330	185.26	622.984	-1.74945	1.59e-09	617.23	-1.7347	1.3389e-06	BHLH87
AT3G21500	222.333	15.2233	3.87579	1.05e-21	12.1113	4.19375	6.6841e-07	DXPS1
AT3G21510	1048.05	225.392	2.21627	1.33e-11	271.555	1.9465	2.75353e-05	AHP1
AT3G21520	220.298	26.0641	3.07903	6.68e-15	18.3363	3.58375	1.08358e-09	DMP1
AT3G21680	29.5713	8.92293	1.72187	0.00361803	5.64786	2.38243	0.00210729	-
AT3G21710	684.302	107.47	2.66892	4.5e-08	109.65	2.63864	4.89474e-05	VUP1
AT3G22550	416.077	95.0494	2.12849	8.61e-16	116.363	1.83696	0.000231279	FLZ8
AT3G22600	647.297	107.356	2.59202	0.00318478	87.4591	2.88483	4.66316e-06	-
AT3G22620	443.237	53.4741	3.04967	3.89e-08	58.9635	2.90636	6.96454e-05	-
AT3G22740	457.615	143.486	1.67402	5.95e-05	93.8525	2.28679	4.62276e-06	HMT3
AT3G22850	1119.67	357.695	1.64596	3.51e-06	447.564	1.3219	0.00101098	-
AT3G22910	57.8438	16.9618	1.76831	0.000569434	11.3608	2.34869	2.13695e-05	ACA13
AT3G23180	198.244	39.0932	2.33919	9.85e-06	46.3545	2.09209	0.000953833	-
AT3G23240	107.879	33.7856	1.67008	0.000308252	29.1259	1.88754	0.00411695	ERF1B
AT3G23250	80.2641	5.90806	3.75588	2.09e-06	8.28627	3.27403	1.18805e-05	MYB15
AT3G23430	2771.81	852.555	1.70061	2.17e-14	735.463	1.91187	0.00019534	PHO1
AT3G23730	564.858	1245.78	-1.14108	4.08e-07	1720.66	-1.6065	1.19278e-09	XTH16
AT3G23870	188.358	45.9973	2.03568	5.71e-11	60.4493	1.63881	2.09474e-09	-
AT3G24020	15.1285	3.01443	2.32794	0.00774564	0.650045	4.50695	0.0010941	DIR16
AT3G24210	98.4377	5.24813	4.2164	1.36e-10	16.0671	2.61042	0.0049142	-
AT3G24750	43.3275	4.55827	3.23425	6.81e-05	2.34924	4.20508	5.9825e-07	-
AT3G25240	338.079	13.4201	4.6531	0.000348053	5.78469	5.87419	3.39136e-06	-
AT3G25250	135.703	22.6583	2.57793	6.4e-06	23.0718	2.5546	0.000751446	OXI1
AT3G25290	267.081	68.6111	1.96101	6.29e-10	91.811	1.53944	3.8696e-05	-
AT3G25505	16.7725	1.94924	3.08457	0.00364709	2.3122	2.84866	0.00871794	-
AT3G25597	52.796	9.10405	2.54135	1.2e-06	17.0147	1.63143	0.00626324	-
AT3G25610	790.346	260.989	1.59833	7.67e-07	280.955	1.49216	0.000110019	ALA10
AT3G25780	351.804	116.643	1.59142	9.57e-07	103.334	1.76745	0.000963036	AOC3
AT3G25795	43.2887	3.23871	3.71535	8.69e-07	5.62217	2.93614	1.08129e-05	-
AT3G25820	221.337	39.4687	2.48397	1.83e-07	41.518	2.41153	0.000880386	TPS27
AT3G25882	92.3234	31.7919	1.53591	0.00178546	21.1969	2.12135	0.000194532	NIMIN-2
AT3G25950	24.6446	2.01001	3.61738	0.000118685	2.98077	3.03925	0.00115695	-
AT3G26440	672.565	203.601	1.72294	1.44e-06	205.451	1.70881	0.000476707	-
AT3G26470	389.257	89.7474	2.11539	5.02e-05	82.7337	2.2299	0.00089255	-
AT3G26590	442.972	108.692	2.02569	5.37e-09	127.331	1.79738	0.000244512	DTX29
AT3G26770	400.092	130.808	1.61199	1.27e-18	165.013	1.27613	0.000955265	-
AT3G27150	283.991	40.6073	2.80212	1.06e-08	49.1309	2.52933	1.3765e-07	-
AT3G27170	197.055	74.4444	1.4037	0.000759261	71.2306	1.46907	0.00106277	CLC-B
AT3G27190	1109.67	306.428	1.8561	2.68e-12	434.452	1.35217	9.00978e-06	UKL2
AT3G27220	721.04	228.798	1.65555	3.22e-17	356.703	1.01584	9.30839e-08	-
AT3G27884	84.7874	10.4662	3.01154	7.7e-05	16.7912	2.33153	0.00798371	-
AT3G28510	84.4884	21.6689	1.96249	0.00470579	3.31415	4.65951	2.49797e-12	-
AT3G28740	636.479	308.25	1.04651	0.000274255	182.309	1.80095	5.41541e-06	CYP81D11
AT3G29034	205.257	68.7719	1.57545	3.34e-05	98.5606	1.05698	0.00468234	-
AT3G29110	51.8122	0.659778	6.27831	6.58e-08	4.60588	3.48247	0.0001284	TPS16
AT3G29250	1081.84	113.599	3.25096	2.8e-22	81.0578	3.73779	0.000275329	SDR4
AT3G29970	114.192	7.31847	3.96225	1.54e-06	5.43098	4.40377	4.50528e-06	-
AT3G30160	11.0859	0	5.90832	0.000531057	0	5.90991	0.000690456	-
AT3G30180	829.625	1695.15	-1.03068	1.35e-13	1748.15	-1.07578	1.1468e-07	CYP85A2
AT3G30260	13.8145	0.314845	5.26288	0.000446084	0.325022	5.25903	0.000452522	AGL79
AT3G30350	68.3332	5.87782	3.52587	4.67e-07	5.31149	3.67905	8.29916e-07	RGF4
AT3G30725	25.5339	1.72525	3.91214	0.000213332	1.34848	4.24939	3.71802e-05	GDU6
AT3G30842	21.0149	2.86384	2.84936	0.00672355	4.05262	2.379	0.00233896	ABCG38
AT3G32980	3644.51	1487.7	1.2925	1.08e-06	1401.86	1.37641	0.000171484	PER32
AT3G43110	264.449	9.08659	4.84772	1.42e-16	8.91661	4.88605	2.19235e-13	-
AT3G43190	396.212	66.7487	2.5652	5.6e-15	54.5666	2.85692	1.49561e-21	SUS4
AT3G43800	1391.42	655.476	1.08558	3.32e-06	676.127	1.04047	0.00110126	GSTU27
AT3G44300	2013.6	487.591	2.04593	2.55e-07	266.827	2.91619	0.000721213	NIT2
AT3G44320	651.769	158.228	2.04149	2.11e-10	138.947	2.2291	3.99091e-10	NIT3
AT3G44326	99.2555	15.206	2.70141	1.2e-07	15.1661	2.70476	0.0015415	-
AT3G44510	274.486	22.2521	3.62317	0.00092275	18.3703	3.90099	2.20363e-14	-
AT3G44540	395.36	29.3459	3.74845	4.74e-14	38.211	3.36766	6.05688e-06	FAR4
AT3G44550	219.319	26.5125	3.04569	2.6e-10	35.0247	2.64301	2.71589e-05	FAR5
AT3G44720	526.19	195.35	1.42911	4.58e-09	177.242	1.56922	1.36753e-07	ADT4
AT3G44860	17.2923	0.314845	5.58752	0.00360508	0	6.55256	0.00322595	FAMT
AT3G44990	409.682	77.5308	2.40163	2.75e-07	81.7354	2.32411	1.71296e-05	XTH31
AT3G45010	1230.07	222.701	2.46574	5.43e-18	310.578	1.98425	2.03964e-10	SCPL48
AT3G45070	82.5574	8.75779	3.23986	2.9e-06	15.7648	2.38475	0.00296545	-
AT3G45080	59.898	5.24813	3.50205	2.24e-06	7.20606	3.04993	0.00269001	SOT6
AT3G45130	81.6803	1.25938	5.9725	7.72e-07	3.01781	4.76146	1.54195e-05	LAS1
AT3G45710	481.319	139.486	1.78576	0.000562837	125.806	1.93242	0.00588368	NPF2.5
AT3G45860	56.623	6.14876	3.21192	9.81e-05	1.99136	4.82086	2.04431e-10	CRK4
AT3G46080	62.3296	11.8343	2.4016	0.000138697	8.2534	2.91485	0.000196664	ZAT8
AT3G46090	41.0366	5.33928	2.94194	0.0027641	5.00736	3.03875	0.00839739	ZAT7
AT3G46120	51.3577	0	8.11962	1.42e-07	0	8.12187	4.13326e-07	PAP19
AT3G46500	137.558	45.4839	1.59468	4.94e-05	42.9196	1.6774	1.52188e-05	-
AT3G46720	44.2525	6.28293	2.8117	0.000517939	6.67132	2.72676	4.93169e-05	UGT76E5
AT3G47200	73.9622	10.3027	2.8398	1.79e-08	20.5654	1.84089	0.000571661	-
AT3G47210	160.73	30.9209	2.37398	1.89e-06	54.388	1.55915	0.00210123	-
AT3G47220	263.876	50.3721	2.38469	1.43e-11	110.369	1.25538	0.000310054	PLC9
AT3G47420	3972.32	684.923	2.53584	9.55e-13	618.27	2.68356	6.90863e-26	ATPS3
AT3G47480	76.9007	31.1924	1.30005	0.00555635	23.6639	1.69998	0.000129066	CML47
AT3G47540	189.279	54.0052	1.81049	3.33e-09	59.3536	1.6728	2.13528e-08	-
AT3G47720	13.3552	0.314845	5.21527	0.00163485	0.325022	5.21791	0.00197869	SRO4
AT3G47760	25.2082	0	7.09308	3.18e-07	0.975067	4.66254	5.03718e-05	ABCA5
AT3G47770	31.1334	2.57893	3.56833	0.000109166	2.96225	3.38287	0.000545139	ABCA6
AT3G47950	197.864	62.5996	1.65824	5.41e-12	71.4128	1.46971	1.1389e-09	AHA4
AT3G48020	213.837	39.7531	2.42351	1.66e-07	31.9006	2.74064	1.10024e-12	-
AT3G48080	236.343	69.5626	1.76355	0.00630355	54.3678	2.11769	0.0066999	EDS1B
AT3G48240	18.6551	3.95896	2.22852	0.00620539	4.3633	2.09814	0.00598589	-
AT3G48340	1025.56	46.08	4.47461	1.89e-08	62.8883	4.02404	0.000362669	CEP2
AT3G48344	15.1035	0.34508	5.39191	0.000687473	0	6.34967	0.000169299	-
AT3G48346	16.3969	0.629689	4.64148	0.000987058	1.01629	4.02093	0.00113598	-
AT3G48450	54.8898	6.3434	3.11208	1.03e-06	7.35542	2.89587	2.94787e-07	-
AT3G48510	59.4345	10.738	2.4707	3.62e-07	17.5363	1.75531	0.00156315	-
AT3G48720	310.418	723.164	-1.22044	2.32e-10	745.96	-1.26612	9.50897e-06	-
AT3G48920	205.736	37.368	2.4575	6.28e-06	50.3122	2.02849	0.00773246	AtMYB45
AT3G48970	114.336	232.066	-1.022	0.000202402	278.668	-1.28466	0.000233292	HIPP31
AT3G49120	4127.51	706.9	2.54565	1.5e-05	567.486	2.86281	2.3526e-09	PER34
AT3G49190	20.239	2.23415	3.15473	0.00684708	0.668567	4.92012	0.00035374	-
AT3G49570	121.03	14.2923	3.07896	3.92e-12	8.06402	3.91046	1.20229e-10	LSU3
AT3G49580	364.363	16.449	4.45559	1.81e-17	12.4632	4.8716	2.21826e-16	LSU1
AT3G49690	33.1825	8.63788	1.93843	0.00302512	6.42039	2.3711	0.00238837	RAX3
AT3G49780	1145.06	450.041	1.34681	2.31e-05	307.083	1.89614	0.000314609	PSK3
AT3G49950	38.3505	92.0901	-1.26251	0.000210011	81.0697	-1.07881	0.00509581	SCL32
AT3G50150	29.2179	4.96338	2.553	0.00494528	5.64786	2.36536	0.00487735	-
AT3G50260	250.219	64.7511	1.94877	0.000127574	67.0299	1.89665	0.00129014	ERF011
AT3G50280	62.3605	3.04422	4.36643	3.04e-09	7.01487	3.14984	6.86174e-08	-
AT3G50300	34.9043	4.99376	2.8022	0.000169093	5.24875	2.7222	0.00448527	-
AT3G50350	312.998	77.5957	2.01055	2.62e-09	99.2184	1.65853	1.48907e-05	-
AT3G50400	85.5177	15.9092	2.41947	0.000656639	10.3464	3.04256	8.43314e-05	-
AT3G50640	195.518	14.8904	3.71088	2.2e-11	12.7727	3.92895	7.14427e-07	-
AT3G50930	543.041	204.909	1.40541	0.000232403	138.798	1.96966	2.53417e-05	HSR4
AT3G50970	144.891	18.8334	2.93496	2.71e-07	26.1751	2.46433	1.95983e-05	XERO2
AT3G51440	425.948	134.059	1.66781	1.59e-10	122.242	1.80022	1.3209e-07	SSL6
AT3G51450	200.972	67.1254	1.58124	8.78e-05	51.9791	1.95239	0.000255125	SSL7
AT3G51540	101.64	34.6754	1.55059	6.61e-05	22.0292	2.20502	2.8857e-07	-
AT3G51642	22.7007	1.63455	3.7746	8.17e-05	2.67427	3.08159	0.00124959	-
AT3G51860	1078.79	416.94	1.37147	1.12e-07	480.734	1.16696	6.12274e-05	CAX3
AT3G52190	851.927	263.575	1.69192	3.55e-11	259.683	1.71353	1.7455e-07	PHF1
AT3G52400	962.008	419.2	1.1979	4.81e-06	345.728	1.47453	4.29375e-08	SYP122
AT3G52430	185.764	47.7786	1.95643	6e-09	55.9988	1.72721	0.000167758	PAD4
AT3G52820	169.874	11.3681	3.90147	4.16e-21	9.95142	4.0871	1.02015e-13	PAP22
AT3G53250	12.4427	66.6641	-2.42187	1.5e-06	40.6965	-1.70729	0.00116555	-
AT3G53620	813.755	323.267	1.33202	2.37e-12	389.473	1.06291	1.68085e-07	PPA4
AT3G53680	27.5747	66.5179	-1.27078	0.00238153	83.5414	-1.60026	3.01431e-06	-
AT3G53900	179.563	384.16	-1.09696	3.26e-06	437.063	-1.28364	4.21785e-08	UPP
AT3G54090	459.831	960.443	-1.06238	1.99e-08	1063.96	-1.21005	1.93908e-07	FLN1
AT3G54150	347.913	88.0898	1.98142	6.48e-08	90.8998	1.93499	9.93462e-07	-
AT3G54260	285.381	67.0205	2.08964	2e-07	86.9309	1.71133	0.00149549	TBL36
AT3G54270	58.9534	25.0175	1.24118	0.00419183	23.4291	1.33136	0.00312328	SPP3A
AT3G54520	27.6842	3.3893	3.03628	0.00532237	2.65275	3.38141	0.00208245	-
AT3G54530	29.4176	3.29933	3.14856	0.00034068	2.63005	3.47337	0.000715229	-
AT3G54700	12.4315	0	6.07326	0.000162109	0.336372	5.11219	0.00103335	PHT1-7
AT3G55290	158.044	69.2869	1.18892	0.000833206	50.9478	1.63272	0.000161858	-
AT3G55720	159.313	38.6897	2.03754	1.53e-05	49.1967	1.69169	0.00246237	-
AT3G55880	268.049	100.867	1.40983	0.00023677	108.932	1.29645	0.000218775	SUE4
AT3G55970	127.577	14.6977	3.11761	0.000107356	8.69972	3.87764	2.55473e-05	JRG21
AT3G56080	133.87	36.6349	1.86636	4.03e-05	40.5967	1.71892	0.00173892	-
AT3G56220	47.1963	4.64883	3.33825	7.35e-08	10.332	2.18908	0.000523319	-
AT3G56400	673.898	273.947	1.29888	0.000994567	307.016	1.13357	1.2505e-06	WRKY70
AT3G56620	211.227	51.772	2.03019	4.49e-10	81.0088	1.37983	0.00108383	-
AT3G57010	364.571	78.9721	2.2054	1.86e-09	96.6482	1.91232	0.00414286	SSL8
AT3G57020	108.208	40.3275	1.42258	4.21e-06	32.6289	1.72646	1.49925e-06	SSL9
AT3G57157	129.973	14.4719	3.16982	1.54e-09	11.0687	3.55616	7.41803e-15	-
AT3G57180	162.676	326.619	-1.00515	0.000293459	352.286	-1.11393	2.10039e-05	BPG2
AT3G57380	92.0975	25.7026	1.83767	0.000969795	20.5786	2.1569	0.00132096	-
AT3G57540	238.649	49.5916	2.26601	5.5e-06	52.5909	2.17973	2.20507e-05	REM4.1
AT3G57950	34.455	2.92401	3.53441	3.52e-06	3.62364	3.23665	4.5676e-05	-
AT3G58550	1714.22	254.728	2.75027	0.0026943	266.845	2.68169	0.00500444	-
AT3G58710	301.966	150.225	1.00532	1.97e-05	138.703	1.12014	1.18288e-05	WRKY69
AT3G59220	255.347	33.3186	2.93417	4.44e-07	56.8311	2.16507	0.00565006	PRN1
AT3G59370	136.858	5.96809	4.51303	5.74e-15	10.7813	3.66021	0.000275157	-
AT3G60330	573.041	146.74	1.96512	4.06e-05	186.763	1.61619	0.00242257	AHA7
AT3G60490	104.892	25.3457	2.04809	1.9e-05	26.6494	1.97422	0.000602141	ERF035
AT3G60870	30.8985	3.35907	3.204	0.000302646	4.96077	2.62978	0.00130608	AHL18
AT3G61190	108.26	39.4157	1.45717	0.00162607	26.8525	2.00945	1.3873e-05	BAP1
AT3G61280	112.269	39.832	1.49659	0.00626729	20.9747	2.41988	7.89495e-06	-
AT3G61410	217.704	30.6333	2.82385	1.26e-05	26.8048	3.01742	9.37726e-10	-
AT3G61880	64.8965	26.2765	1.30692	0.0048058	28.4705	1.18789	0.00662509	CYP78A9
AT3G61930	45.9602	5.33987	3.10453	7.35e-05	6.62293	2.78793	0.000194265	-
AT3G61990	863.977	182.46	2.24233	1.89e-13	201.976	2.09516	2.46369e-05	OMTF3
AT3G62740	25.6281	5.65368	2.17744	0.00416736	2.34924	3.44844	0.000544052	BGLU7
AT3G62950	501.685	204.556	1.29404	0.000621942	107.896	2.2132	2.6369e-06	GRXC11
AT3G62990	26.3222	1.91916	3.74472	0.000262056	3.61229	2.85482	0.00788632	-
AT3G63210	959.781	442.057	1.11805	6.1e-05	432.115	1.14889	0.000823742	MARD1
AT4G00050	96.7388	296.633	-1.61582	6.04e-15	219.717	-1.18345	4.67367e-05	UNE10
AT4G00200	179.712	79.9222	1.16882	2.22e-05	78.126	1.19911	0.00110467	AHL7
AT4G01110	58.0642	12.7913	2.17513	0.000292306	12.1824	2.24677	0.00359511	-
AT4G01140	32.7597	3.6742	3.15586	5.28e-06	7.71748	2.08711	0.000346136	-
AT4G01440	280.855	95.9813	1.54812	7.91e-08	117.576	1.25356	0.00423659	-
AT4G01470	36.365	1.66493	4.44502	3.2e-07	0.325022	6.65923	4.35273e-07	TIP1-3
AT4G01480	1808.79	308.573	2.55084	4.94e-12	380.679	2.24722	8.40838e-07	PPA5
AT4G01910	236.469	61.8908	1.93115	1.32e-08	96.3846	1.29193	0.000193921	-
AT4G01925	51.8663	8.23218	2.6505	0.00123896	10.2322	2.33455	0.000909043	-
AT4G02050	1085.77	447.023	1.27974	1e-08	457.525	1.24592	9.87497e-11	STP7
AT4G02090	123.838	18.7428	2.71662	5.76e-05	23.8999	2.36899	2.76775e-05	-
AT4G02280	544.515	237.843	1.19374	1.48e-10	259.886	1.0657	3.86798e-05	SUS3
AT4G02830	100.93	9.08659	3.46128	4.01e-07	18.2449	2.4619	1.6734e-05	-
AT4G03610	118.389	25.4789	2.21202	8.88e-08	30.064	1.97431	0.00357249	-
AT4G03960	608.564	159.299	1.93387	4.94e-13	174.387	1.80298	8.03286e-16	DSP4
AT4G04460	212.978	28.5849	2.89529	4.26e-12	35.8397	2.56737	2.86604e-06	APA3
AT4G04490	142.772	18.7614	2.93052	0.00084767	8.38605	4.09382	2.0687e-07	CRK36
AT4G04540	21.508	2.35435	3.19513	0.00576869	0	6.86691	2.85743e-05	CRK39
AT4G04610	1708.48	603.078	1.50238	4.62e-05	672.883	1.34567	0.00495008	2022-04-01
AT4G04810	257.345	73.8112	1.79847	7.64e-08	82.1936	1.6441	0.000223877	MSRB4
AT4G04830	2800.2	422.894	2.72674	1.92e-32	395.017	2.82419	0.000420302	MSRB5
AT4G04900	36.6329	3.01443	3.60466	3.82e-05	7.98395	2.19558	0.00504583	RIC10
AT4G04990	463.722	34.2163	3.75886	0.000701388	59.6565	2.95604	0.00428718	-
AT4G05020	506.351	203.526	1.31527	0.00286609	186.548	1.44026	0.000248934	NDB2
AT4G05105	16.0662	3.01428	2.4154	0.00591009	0.986417	4.00699	0.000444925	MIR397A
AT4G05590	363.387	139.091	1.3837	3.34e-06	129.687	1.48547	3.75322e-08	-
AT4G06744	926.418	255.082	1.86006	1.06e-06	327.608	1.49706	0.0040596	-
AT4G08040	101.94	233.336	-1.1949	0.00500399	281.368	-1.46316	0.000217277	ACS11
AT4G08290	1221.83	489.872	1.31859	3.58e-10	567.314	1.105	0.000153523	-
AT4G08360	13.1226	1.03524	3.68801	0.0076501	0	6.14791	0.000156113	-
AT4G08430	7.18943	0	5.28335	0.00421316	0	5.28453	0.00481148	-
AT4G08450	26.9692	5.65398	2.25075	0.00264814	5.00917	2.42347	0.00321999	-
AT4G09100	19.0354	2.54885	2.87479	0.00876351	2.04274	3.23074	0.00373332	ATL39
AT4G09300	54.5184	5.56313	3.27953	1.62e-06	11.9087	2.18919	0.0045319	-
AT4G09770	41.3506	11.8161	1.80106	0.00853906	7.60517	2.4384	0.00808496	-
AT4G10120	910.078	304.089	1.58147	1.26e-05	292.402	1.63975	1.89191e-07	SPS4
AT4G10510	85.5331	16.254	2.39074	0.00353853	17.9372	2.24797	0.00691406	SBT3.7
AT4G10960	221.476	53.236	2.05588	1.17e-05	55.4713	1.99558	1.09457e-06	UGE5
AT4G11210	66.0656	2.63926	4.63337	2.89e-10	3.59795	4.18578	2.09293e-06	DIR14
AT4G11350	68.1666	21.4596	1.66221	0.000156647	22.0621	1.62657	0.000136403	-
AT4G12080	770.463	383.872	1.00452	2.16e-05	362.713	1.08502	1.21217e-05	AHL1
AT4G12090	181.18	22.2526	3.02065	6.2e-07	41.3244	2.13193	7.03209e-06	-
AT4G12350	23.2864	4.87326	2.2421	0.0069937	2.65574	3.12524	0.000801268	MYB42
AT4G12490	18.5722	1.72481	3.4488	0.0044647	1.66216	3.48117	0.00359054	-
AT4G12500	123.064	4.27381	4.8397	6.58e-08	9.04327	3.7698	2.61847e-05	-
AT4G13130	64.636	14.2315	2.17794	5.38e-06	11.2515	2.51657	0.000153445	-
AT4G13190	94.7052	36.7566	1.36237	0.00115749	22.1923	2.08915	0.00334607	PBL24
AT4G13260	39.6241	158.503	-2.00022	2.36e-09	129.563	-1.70907	8.19495e-05	YUC2
AT4G13420	2540.56	182.339	3.80018	1.72e-05	270.454	3.22967	0.000515567	POT5
AT4G13554	97.8981	13.1054	2.8949	1.62e-05	17.3511	2.49316	5.28271e-07	MIR857A
AT4G13580	157.101	16.1639	3.27259	1.41e-06	27.0079	2.53688	0.00337262	DIR18
AT4G13660	865.524	265.562	1.70385	8.61e-06	357.806	1.27246	0.000515832	PRR2
AT4G13700	29.142	0.314845	6.34048	3.05e-06	0	7.30216	1.33953e-07	ATPAP23
AT4G13800	14.7188	2.32471	2.6581	0.00467926	3.03334	2.28482	0.00824546	-
AT4G13890	25.2676	2.54885	3.284	0.00303123	0.986417	4.65914	9.7987e-05	SHM5
AT4G14130	16850.5	38434.7	-1.18962	2.12e-08	50246.9	-1.57612	6.66501e-07	XTH15
AT4G14305	69.3199	19.2865	1.84276	1.87e-05	25.3959	1.44538	0.000434953	-
AT4G14370	61.8838	10.6172	2.5394	4.01e-06	11.0173	2.48899	2.0343e-07	-
AT4G14580	560.363	213.388	1.39234	5.61e-07	274.409	1.02807	0.00314955	CIPK4
AT4G15093	493.592	133.6	1.88402	4.44e-07	163.452	1.59271	6.08142e-05	LIGB
AT4G15120	48.4761	7.88739	2.61347	0.000814208	10.2991	2.23112	0.00115953	-
AT4G15160	463.114	43.8502	3.39766	3.44e-33	97.4237	2.24744	0.000457756	-
AT4G15210	37.8004	0.34508	6.71581	3.3e-05	1.03063	5.21825	0.000679495	BAM5
AT4G15230	866.406	278.768	1.63542	9.36e-11	307.319	1.49319	1.30119e-05	ABCG30
AT4G15270	67.8017	15.1755	2.15503	0.000195318	15.1446	2.1586	0.00350237	-
AT4G15280	62.1875	5.74424	3.44335	1.7e-07	9.57083	2.69732	0.000475206	UGT71B5
AT4G15290	108.526	6.01214	4.16686	0.00773454	9.62939	3.49078	0.000123629	CSLB5
AT4G15380	190.683	50.4465	1.91721	0.000116299	36.7795	2.37093	0.000254633	CYP705A4
AT4G15393	125.187	19.5689	2.67612	0.000524579	18.5544	2.74889	4.29586e-05	CYP702A5
AT4G15396	49.2539	9.14721	2.4181	0.000155518	6.23099	2.97441	0.00321977	CYP702A6
AT4G15710	1.98719	15.0125	-2.92415	0.00771407	22.3219	-3.50138	0.00268935	-
AT4G15910	684.042	98.9825	2.78584	9.95e-47	130.203	2.39211	5.67125e-06	ATDI21
AT4G16000	250.466	100.741	1.31398	1.37e-05	90.089	1.47244	0.000163608	-
AT4G16620	84.6857	8.3835	3.33824	2.3e-09	10.5602	2.99752	0.000293654	-
AT4G17215	196.339	18.9837	3.36344	2.17e-10	23.5952	3.05218	0.000132924	-
AT4G17280	121.51	19.4356	2.645	2.24e-07	37.7629	1.68224	0.00587714	-
AT4G17490	214.94	77.0848	1.4774	7.77e-08	88.4586	1.27864	1.19448e-05	ERF6
AT4G17500	1649.99	715.685	1.20484	7.46e-08	762.421	1.11459	3.09099e-05	ERF1A
AT4G17670	120.412	16.3325	2.88004	1.85e-14	37.1798	1.69421	1.00545e-07	FLZ2
AT4G17790	942.064	412.939	1.18976	5.24e-13	432.987	1.12027	3.51666e-12	-
AT4G18360	1002.89	268.379	1.90129	3.78e-06	311.037	1.68832	0.00173256	GLO5
AT4G18510	55.7749	7.94801	2.80437	1.67e-07	8.53602	2.701	0.00180456	CLE2
AT4G18550	215.216	21.8651	3.29437	8.97e-18	22.8209	3.23287	4.17094e-08	-
AT4G18610	96.5204	29.946	1.68519	0.00241908	23.3855	2.04057	0.00489004	LSH9
AT4G18970	522.119	1091.9	-1.06433	0.00162207	1939.91	-1.89244	8.02371e-07	-
AT4G19230	285.239	93.6406	1.60584	6.44e-07	127.852	1.15818	0.000305077	CYP707A1
AT4G19370	118.492	56.7918	1.05923	0.00325183	51.4372	1.20248	0.00555249	-
AT4G19810	1270.17	101.992	3.63515	1.83e-44	125.251	3.34102	3.36887e-09	ChiC
AT4G19980	24.2879	3.04451	3.00506	0.000148606	2.98077	3.01793	0.00102092	-
AT4G20000	137.744	28.8205	2.25305	0.000194896	44.1044	1.63838	0.00122133	-
AT4G20110	1141.93	387.488	1.55898	1.65e-05	336.978	1.75891	6.70673e-05	VSR7
AT4G20140	404.143	122.902	1.71757	3.83e-07	166.531	1.27696	0.00159946	GSO1
AT4G20210	22.69	2.38444	3.26117	0.00215896	2.6187	3.10009	0.00539215	TPS08
AT4G20235	77.4956	19.3462	2.00051	3.28e-07	26.9798	1.51854	0.000121829	CYP71A28
AT4G20390	418.071	52.9967	2.97709	9.24e-18	71.0861	2.55343	0.000188065	-
AT4G20820	385.963	127.666	1.59424	7.49e-10	76.8229	2.32621	1.83905e-13	-
AT4G21120	225.446	48.6976	2.21269	4.72e-13	53.3108	2.07931	2.77359e-10	CAT1
AT4G21326	676.639	270.368	1.32386	1.19e-06	211.375	1.67814	2.54767e-09	ATSBT3.12
AT4G21470	1065.93	475.456	1.16483	8.05e-07	474.76	1.16689	9.42897e-12	FHY
AT4G21600	336.539	114.464	1.55424	3.57e-05	126.976	1.40383	0.0018829	ENDO5
AT4G21840	15.7252	1.60431	3.26115	0.00271881	0.650045	4.56439	0.000722834	MSRB8
AT4G21990	1511.73	641.109	1.23741	7.84e-08	654.215	1.2085	0.000437488	2022-04-03
AT4G22110	17.0788	0.974622	4.10171	0.000343038	0.325022	5.56695	0.000102316	-
AT4G22214	61.9395	1.6344	5.21929	2.87e-10	2.0057	4.94634	6.63395e-10	-
AT4G22590	275.919	108.264	1.34902	3.26e-06	132.391	1.06026	0.000283284	TPPG
AT4G22680	27.2877	5.27881	2.36104	0.000657196	7.30702	1.89387	0.00585894	MYB85
AT4G22810	220.376	54.0891	2.02576	0.000587878	68.3096	1.68673	0.000723691	AHL24
AT4G23000	333.66	106.348	1.65056	6.92e-10	92.5978	1.84917	1.23797e-11	-
AT4G23130	98.2704	21.3256	2.20253	4.82e-09	34.6931	1.50105	6.04063e-05	CRK5
AT4G23160	37.3062	13.0019	1.51993	0.00931196	7.38348	2.33936	0.000863329	CRK8
AT4G23450	232.06	96.8371	1.2613	1e-05	82.2999	1.49293	0.00012143	AIRP1
AT4G23496	47.7556	4.3651	3.45347	7.1e-05	2.93655	4.00534	7.36625e-05	SP1L5
AT4G23670	15087.5	5589.46	1.4325	1.23e-15	5234.07	1.52591	5.31533e-06	-
AT4G23680	2924.03	790.764	1.88613	8.33e-14	627.724	2.21836	1.48087e-06	-
AT4G23770	6.23903	21.6422	-1.79608	0.00938864	24.9413	-1.99991	0.00384861	-
AT4G24000	66.1886	4.99391	3.7263	4.87e-06	2.65574	4.63694	6.54074e-06	CSLG2
AT4G24026	32.7739	5.3089	2.62038	1.82e-05	10.4443	1.65308	0.00270198	-
AT4G24110	240.641	59.6448	2.01189	1.73e-07	99.5254	1.27599	0.00134427	-
AT4G24130	164.83	53.9262	1.61137	0.00148949	44.1331	1.89873	0.000269853	-
AT4G24140	240.579	48.0759	2.32049	8.53e-07	82.3483	1.54473	0.000176376	BDG3
AT4G25000	72.307	17.2618	2.06918	0.00262669	20.0277	1.8506	0.00155826	AMY1
AT4G25160	140.849	28.3006	2.31381	1.43e-08	39.9347	1.81655	9.83216e-05	PUB35
AT4G25250	40.2096	1.0348	5.31338	1.08e-06	5.63651	2.83222	0.00240838	PMEI4
AT4G25410	47.9265	10.8416	2.13661	0.000473066	8.24804	2.5321	0.00161156	BHLH126
AT4G25560	19.6675	2.95425	2.72064	0.000743067	2.29368	3.08626	0.00345992	LAF1
AT4G25900	1385.39	530.568	1.38443	1.4e-07	631.376	1.13303	7.20605e-05	-
AT4G26120	151.629	48.1406	1.6551	1.5e-07	60.1022	1.33329	5.97895e-05	-
AT4G26200	185.595	20.9084	3.15247	2.21e-08	58.0822	1.67871	0.00314785	ACS7
AT4G26260	85.0888	3.58423	4.55609	1.48e-06	3.72043	4.52167	6.13696e-07	MIOX4
AT4G26270	359.088	144.741	1.31093	2.61e-08	122.588	1.54972	1.16683e-08	PFK3
AT4G26470	165.362	80.8603	1.03071	0.0079925	59.6045	1.46933	9.52003e-05	-
AT4G26890	78.9832	19.4801	2.01402	6.02e-06	25.896	1.61037	3.851e-05	MAPKKK16
AT4G27450	15200.2	6926.63	1.13388	1.99e-07	7199.31	1.07741	7.75457e-05	-
AT4G27480	96.2471	28.4334	1.7545	9.71e-06	45.0161	1.09344	0.00268241	-
AT4G27560	141.929	68.0839	1.05797	0.00707137	48.8979	1.53891	0.000218021	UGT79B2
AT4G27860	946.783	343.32	1.46274	7.51e-10	336.2	1.49373	4.54721e-06	-
AT4G28350	202.293	71.7285	1.49271	9.65e-07	77.1975	1.38769	1.51037e-05	LECRK72
AT4G28530	122.255	16.6904	2.8662	1.4e-06	24.1562	2.33645	0.000120796	anac074
AT4G28720	126.785	386.011	-1.60625	6.98e-07	341.989	-1.43219	0.000112121	YUC8
AT4G28780	144.53	299.418	-1.05114	5.24e-05	313.717	-1.12015	0.000263588	-
AT4G28790	245.416	65.6072	1.90049	4.84e-07	59.5806	2.03967	2.86074e-09	BHLH23
AT4G28840	104.8	15.43	2.75771	2.94e-06	17.0535	2.61404	0.00238	SPEAR3
AT4G28890	231.997	57.659	2.00597	4.46e-06	50.3277	2.202	0.00142017	ATL42
AT4G28940	219.183	15.7012	3.80273	1.84e-18	18.7641	3.5412	5.5498e-07	-
AT4G29210	756.183	354.346	1.09344	5.18e-10	376.891	1.00375	0.00116254	GGT3
AT4G29690	136.655	11.8459	3.52357	1.31e-06	8.48763	4.00268	6.88051e-05	-
AT4G29700	707.449	229.713	1.62228	1.39e-06	194.581	1.86139	0.000314314	-
AT4G29740	112.544	20.5448	2.4504	5.25e-07	30.7594	1.86759	0.00304137	CKX4
AT4G29800	136.726	15.0409	3.18426	1.54e-06	27.0862	2.33256	0.00211258	PLP8
AT4G30460	430.465	158.351	1.4419	1.83e-05	115.946	1.88865	0.00223636	-
AT4G30640	48.3892	7.82722	2.61867	0.00078494	6.00276	3.00483	3.02531e-05	FBL19
AT4G31240	997.446	404.127	1.30321	6.36e-11	353.545	1.49535	6.13588e-14	-
AT4G31330	183.491	28.7069	2.67536	7.63e-15	36.39	2.33193	9.62928e-07	-
AT4G31470	19.6998	3.95881	2.30785	0.0101096	2.67427	2.87751	0.00581352	-
AT4G31970	10.8445	0	5.87566	0.000389094	0.687089	4.00271	0.00820113	CYP82C2
AT4G32280	529.444	1654.66	-1.64409	2.63e-12	1259.69	-1.25283	0.000565174	IAA29
AT4G32480	4429.32	1788.01	1.30853	9.97e-14	1473.65	1.58691	1.28134e-09	-
AT4G32650	853.21	393.82	1.11488	0.000315005	425.07	1.00363	0.00401325	KAT3
AT4G32810	856.311	57.2148	3.90379	2.18e-16	191.051	2.16588	5.86146e-05	CCD8
AT4G32870	1442.61	125.566	3.52182	5.02e-08	138.273	3.3839	1.05528e-11	-
AT4G32940	7132.28	2686.43	1.40865	3.5e-13	2932.41	1.28225	4.0235e-09	GAMMA-VPE
AT4G33070	187.497	27.9372	2.74426	4.59e-05	37.0418	2.34242	0.00429705	PDC1
AT4G33330	64.8491	9.92823	2.70287	8.25e-06	14.9946	2.11038	0.000681006	PGSIP3
AT4G33610	116.54	21.0539	2.4642	1.18e-05	14.8483	2.96801	0.00222898	-
AT4G33770	459.081	121.373	1.91773	2.36e-17	109.403	2.06802	2.40542e-12	ITPK2
AT4G33880	131.226	7.88724	4.05123	2.6e-06	11.2473	3.54125	9.08979e-05	BHLH85
AT4G34180	4623	2254.72	1.03583	1.44e-10	1898.33	1.28346	4.21472e-13	CYCLASE1
AT4G34230	1684.9	616.034	1.45142	6.28e-10	608.443	1.46948	0.000103564	CAD5
AT4G34320	31.5893	5.30905	2.56804	0.000424365	6.99635	2.16871	0.00672575	-
AT4G34600	533.84	130.828	2.02799	1.62e-07	135.076	1.97886	0.00051171	CIF2
AT4G35030	152.409	56.0104	1.44256	0.000568135	62.8655	1.27551	0.000143525	-
AT4G35060	130.894	31.1462	2.06495	1.09e-06	35.5248	1.87897	0.000404886	HIPP25
AT4G35160	920.009	212.911	2.11043	9.76e-09	339.96	1.43449	0.00869333	ASMT
AT4G35190	237.625	104.617	1.18488	2.41e-05	91.7184	1.37204	6.96454e-09	LOG5
AT4G35320	302.513	625.002	-1.04655	5.87e-08	688.299	-1.18528	2.52006e-05	-
AT4G36350	18.21	0.314845	5.66241	0.00125461	0	6.62797	0.000557856	PAP25
AT4G36610	90.195	13.1358	2.77229	1.18e-06	7.94871	3.49928	1.1944e-05	-
AT4G36640	358.782	163.87	1.13002	0.000522557	146.872	1.28839	0.00255768	-
AT4G36990	2305.65	648.946	1.82869	2.39e-09	594.437	1.95429	4.6388e-07	HSFB1
AT4G37400	151.749	32.2727	2.23419	0.000102423	33.5771	2.17178	9.42697e-06	CYP81F3
AT4G37410	85.7049	27.7425	1.62339	0.000459312	17.4526	2.29138	0.0045537	CYP81F4
AT4G37520	3049.64	944.13	1.69127	1.01e-16	1111.16	1.45655	1.49684e-05	PER50
AT4G37690	49.0477	11.5322	2.08186	0.000493928	7.9272	2.62	0.000453823	GT6
AT4G37700	71.6414	20.7398	1.782	0.000129119	10.5901	2.7518	7.71081e-05	-
AT4G37770	26.7628	246.897	-3.20414	2.2e-12	352.32	-3.71497	1.57802e-11	ACS8
AT4G37900	152.333	71.9971	1.08001	0.00598983	63.1732	1.26952	0.00386514	GRDP2
AT4G37940	163.694	29.7346	2.45735	0.000186398	42.1125	1.95425	0.00855673	AGL21
AT4G37950	23.1896	0.314845	6.01104	4.91e-05	1.30009	4.13772	0.00170054	-
AT4G37990	97.0446	1.72481	5.82266	0.00259625	0.668567	7.18339	7.40953e-06	CAD8
AT4G38080	886.772	256.248	1.79043	1.15e-10	287.789	1.62159	6.48315e-07	-
AT4G39030	358.515	112.412	1.67287	0.000136114	93.1045	1.94611	0.000131165	DTX47
AT4G39670	74.9012	18.3242	2.02585	0.00111003	18.5968	2.00801	0.000406826	-
AT4G39795	123.868	14.5602	3.07713	1.61e-07	15.2773	3.0153	6.67904e-05	FLZ7
AT5G01075	76.1757	172.277	-1.17698	0.000409411	175.717	-1.20367	0.00141347	-
AT5G01220	2165.54	575.746	1.91118	6.46e-09	501.317	2.11288	2.7979e-09	SQD2
AT5G01250	185.316	21.6225	3.09526	2.12e-06	35.4681	2.38158	0.000265049	-
AT5G01280	43.7294	6.44734	2.7498	0.00283861	4.63575	3.22823	6.49637e-05	-
AT5G01380	62.1508	14.0987	2.1427	9.65e-06	16.3813	1.92441	3.13619e-05	GT-3A
AT5G01550	163.121	15.3563	3.40828	6.28e-11	24.449	2.73275	0.00018894	LECRKA4.2
AT5G01610	109.819	40.1779	1.4477	4.26e-06	41.4009	1.4056	2.74308e-06	-
AT5G01740	500.206	1800.5	-1.8479	4.69e-54	1635.01	-1.70916	2.80692e-17	-
AT5G01790	50.2806	147.774	-1.55457	0.000266981	126.57	-1.32902	0.00297213	-
AT5G01820	806.28	278.748	1.53218	1.08e-32	254.752	1.66173	3.00202e-19	CIPK14
AT5G01900	16.2692	0.344933	5.49997	0.000898994	0.343544	5.50307	0.00118014	WRKY62
AT5G02090	177.221	31.0987	2.50552	4.95e-05	26.9147	2.71476	9.94293e-08	-
AT5G02420	165.766	35.0308	2.23862	1.66e-08	35.9108	2.20312	1.31342e-07	SMR3
AT5G02540	379.1	1978.52	-2.38383	2.2e-21	2120.24	-2.48539	5.08743e-22	-
AT5G02760	1206.93	3099.43	-1.36054	2.48e-16	2451.01	-1.0222	3.4119e-05	-
AT5G03090	103.355	39.0227	1.40262	0.000865131	16.6765	2.63103	3.87022e-09	-
AT5G03120	190.435	403.193	-1.08219	3.27e-05	456.102	-1.25894	9.49511e-05	-
AT5G03210	12.4173	1.69487	2.88448	0.00744034	0	6.07272	0.000206293	-
AT5G03350	85.0953	24.0118	1.82732	0.00811029	15.8472	2.42874	0.00613097	LLP
AT5G03545	15210.1	832.116	4.192	4.59e-07	748.077	4.34442	5.96075e-07	AT4
AT5G03550	67.0646	23.4696	1.51075	0.00196563	22.727	1.55871	0.00146101	-
AT5G04080	222.95	100.091	1.1548	0.00035006	107.055	1.05481	0.00200539	-
AT5G04120	86.394	0.314845	7.90825	1e-09	5.27445	4.02699	2.63739e-06	IPSP
AT5G04140	3141.25	8247.28	-1.39255	4.77e-10	8462.45	-1.4305	3.60612e-10	GLU1
AT5G04200	132.998	15.1175	3.13187	5.44e-07	20.8976	2.66466	2.55002e-07	AMC9
AT5G04340	437.03	95.3065	2.1948	1.98e-20	117.448	1.89434	1.67358e-08	ZAT6
AT5G04860	429.912	212.458	1.01588	0.000424754	199.334	1.1068	0.00804152	-
AT5G05460	383.974	154.874	1.30891	3.84e-09	181.403	1.07996	6.26603e-08	ENGASE1
AT5G05600	864.653	148.813	2.53853	0.000252501	59.5854	3.86139	2.91715e-10	-
AT5G05790	119.267	31.1779	1.93611	0.000111499	47.3767	1.32858	0.000165077	-
AT5G06090	32.2386	0.974622	5.0179	8.63e-06	4.58019	2.80305	0.00773603	GPAT7
AT5G06200	111.814	18.1901	2.61577	1.9e-07	17.8105	2.6473	0.00665216	CASP4
AT5G06230	97.1155	39.2912	1.30408	0.000463889	40.7915	1.25012	0.00157259	TBL9
AT5G06300	689.023	177.698	1.95404	1.12e-13	173.875	1.98355	8.73337e-11	LOG7
AT5G06330	335.566	60.7434	2.463	1.84e-05	73.3129	2.19113	0.00267421	-
AT5G06510	95.8209	17.9951	2.41168	2.13e-05	19.9429	2.26173	0.000874196	NFYA10
AT5G07050	9.20652	0	5.6394	0.00194358	0	5.638	0.00250492	-
AT5G07475	74.8886	9.32759	3.00355	5.61e-06	12.9364	2.52758	0.000229751	-
AT5G08240	652.625	167.8	1.9585	6.85e-06	132.908	2.29303	7.86692e-05	-
AT5G09220	5357.97	2573.29	1.05815	1.58e-05	2488.63	1.10384	1.68473e-06	AAP2
AT5G09470	36.0891	1.63455	4.449	8.07e-05	0.343544	6.65224	2.70603e-05	PUMP6
AT5G09520	62.7003	6.74851	3.22052	2.74e-06	7.8561	2.98944	0.00427849	PELPK2
AT5G09530	844.515	183.758	2.19997	8.8e-15	159.719	2.40022	3.79093e-06	PELPK1
AT5G09570	441.576	80.6538	2.45332	0.00374885	40.5626	3.44655	1.04626e-16	-
AT5G09640	37.8434	3.20862	3.53502	9.82e-05	1.95013	4.2567	0.000160521	SCPL19
AT5G09978	71.2627	5.47286	3.68114	2.87e-07	7.2658	3.28499	1.96411e-06	PEP7
AT5G09980	131.266	29.1066	2.16613	1.13e-06	38.5158	1.76679	0.00484948	PEP4
AT5G10230	83.7007	19.3596	2.10492	1.6e-05	20.486	2.02623	0.00305141	ANNAT7
AT5G10278	52.6176	5.44263	3.25681	0.00043151	7.598	2.78381	0.00106291	-
AT5G10280	184.986	78.1305	1.24184	0.00190742	53.5761	1.78465	0.00372002	MYB92
AT5G10300	272.449	99.2643	1.45486	1.68e-07	95.0397	1.51771	0.000179398	HNL
AT5G10410	120.205	56.2964	1.09186	0.00300304	58.0588	1.04698	0.000571043	-
AT5G10720	144.154	25.7764	2.47842	2.76e-05	37.4254	1.942	0.00759779	AHK5
AT5G10770	2039.54	497.329	2.03588	8.45e-22	875.746	1.21813	0.000107276	-
AT5G10990	65.0472	7.69305	3.07993	4.47e-07	14.1211	2.19746	0.00707008	-
AT5G11210	131.073	15.8959	3.03825	2.21e-12	20.1394	2.69656	4.29843e-06	GLR2.5
AT5G11230	186.941	59.8545	1.64309	2.82e-06	72.2744	1.36876	0.00107965	-
AT5G11440	18.3679	0.314845	5.67432	6.76e-05	1.31861	3.78466	0.000454426	CID5
AT5G11670	13827.3	5214.43	1.4069	5.46e-06	5376.25	1.36223	0.000262227	NADP-ME2
AT5G12270	68.9063	17.2157	1.99584	6.13e-06	23.2182	1.56505	0.00102518	-
AT5G12280	23.3659	4.73909	2.30758	0.00559703	1.96866	3.55153	0.000828579	-
AT5G12420	448.54	142.775	1.65094	0.000497155	215.438	1.05641	0.00382703	-
AT5G12860	2045.03	4415.71	-1.11046	6.74e-05	4945.64	-1.2729	2.4441e-05	DIT1
AT5G12930	279.725	121.525	1.20377	0.00038098	103.71	1.43117	1.03194e-06	-
AT5G13080	224.713	39.6018	2.50101	4.08e-06	48.4486	2.21114	0.000325619	WRKY75
AT5G13200	353.556	149.834	1.2371	2.57e-07	109.443	1.69013	3.38261e-08	-
AT5G13210	203.577	85.2732	1.25474	2.45e-05	29.1415	2.80537	2.42785e-06	-
AT5G13400	122.02	322.225	-1.40067	0.000123949	395.104	-1.69444	1.01648e-06	NPF6.1
AT5G13900	44.4472	5.90791	2.90443	0.00130998	1.98718	4.47018	4.04404e-06	VAS
AT5G13930	388.981	54.1182	2.84706	7.57e-08	39.2542	3.31286	6.13733e-08	CHS
AT5G13990	179.538	18.1592	3.30323	9.58e-06	36.9247	2.27952	0.00117582	ATEXO70C2
AT5G14020	86.4956	11.6353	2.88658	0.000603024	12.1298	2.8294	0.00192698	-
AT5G14150	77.5881	7.7371	3.31058	5.26e-06	12.5175	2.62611	0.0088059	-
AT5G14340	86.2316	6.76233	3.65253	5.13e-08	10.1498	3.08176	0.00209087	AtMYB40
AT5G14690	219.525	51.6536	2.08932	5.49e-17	74.2042	1.56449	1.34795e-07	-
AT5G14730	320.2	156.189	1.0354	0.00502694	117.477	1.44612	0.00067446	-
AT5G15180	332.113	27.8296	3.57473	0.000375449	42.4758	2.96426	1.73953e-05	PER56
AT5G15190	79.0145	29.6937	1.40832	0.00533435	27.0467	1.54199	0.00183188	-
AT5G15240	31.4821	90.3158	-1.52026	1.28e-06	72.7373	-1.2087	0.00581548	AVT1J
AT5G15290	47.2194	7.10711	2.722	0.00346772	9.32707	2.33657	0.0030471	CASP5
AT5G15900	19.3377	2.95396	2.70001	0.00548115	2.33072	3.04789	0.00241243	TBL19
AT5G15960	24.2613	3.29948	2.87022	0.00117576	3.03633	3.00341	0.00399833	KIN1
AT5G16360	448.663	205.975	1.12262	3.74e-06	211.315	1.0854	7.62832e-05	-
AT5G16410	132.236	31.6303	2.0627	9.33e-05	30.8831	2.0955	0.000718964	-
AT5G17960	36.4355	7.39216	2.28612	0.00383074	3.61229	3.32249	0.00028346	-
AT5G18270	268.002	66.9142	1.99955	3.75e-09	71.3442	1.90664	1.21261e-05	ANAC087
AT5G18780	386.224	171.873	1.16695	0.000161247	155.702	1.30949	2.72853e-07	-
AT5G18820	137.153	283.66	-1.04777	3.7e-05	318.557	-1.21488	7.67076e-06	CPN60A2
AT5G19100	194.292	44.6021	2.12176	3.58e-10	47.1629	2.04268	0.00176099	-
AT5G19110	190.04	21.2062	3.16078	2.08e-10	23.8372	2.99443	2.83589e-06	-
AT5G19240	326.223	123.963	1.39565	0.000216083	117.67	1.47033	1.98566e-05	-
AT5G19260	79.0362	31.0778	1.34988	0.00179043	26.0006	1.60115	0.000335811	FAF3
AT5G19875	170.81	57.8445	1.56196	2.88e-07	73.7615	1.20892	0.00280532	-
AT5G20150	4121.9	414.55	3.3136	1.07e-08	309.814	3.73378	1.48681e-53	SPX1
AT5G20410	437.563	104.856	2.06108	2.16e-05	79.9297	2.45537	1.48113e-07	MGD2
AT5G20550	139.718	29.2092	2.25422	0.00159474	29.8788	2.22267	0.00507368	-
AT5G20740	70.451	167.877	-1.25326	0.00827029	183.546	-1.38565	0.00881762	-
AT5G20790	1002.03	77.9422	3.68404	0.00364318	35.67	4.81431	1.61043e-19	-
AT5G20810	33.1422	4.93403	2.73596	3.2e-05	4.59871	2.83844	0.000810253	-
AT5G20830	1080.56	410.215	1.39764	2.44e-09	531.839	1.02062	2.5642e-05	SUS1
AT5G20860	27.5627	2.69958	3.3584	0.00018139	4.61723	2.56908	0.00766942	-
AT5G22430	9.59947	0	5.69929	0.0051045	0	5.68997	0.00737599	-
AT5G22500	748.085	2374.09	-1.66611	5.89e-17	3762.2	-2.33022	2.09874e-46	FAR1
AT5G22540	16.3551	2.32441	2.81006	0.00219757	0.668567	4.61218	0.000378238	-
AT5G22550	71.3093	17.9051	1.99121	0.00088814	19.8586	1.83889	0.00635444	-
AT5G22630	1152.5	421.182	1.45176	7.55e-15	450.258	1.35403	1.08105e-09	ADT5
AT5G23190	154.698	22.0583	2.80601	6.27e-07	19.2444	3.00273	6.24457e-05	CYP86B1
AT5G23530	559.58	192.802	1.53583	6.28e-09	209.949	1.41199	0.00245019	CXE18
AT5G23830	350.428	92.7464	1.91693	0.000915934	78.8412	2.1489	0.00660357	-
AT5G23840	42.3196	8.72873	2.27984	6.37e-05	4.60588	3.19069	0.000712419	-
AT5G23950	90.8996	18.6558	2.28279	9.23e-08	16.9603	2.41719	4.37191e-08	-
AT5G24040	25.2614	3.64397	2.78877	0.00384826	3.99706	2.65498	0.00498184	-
AT5G24140	75.7499	10.9332	2.79063	0.00115131	12.3491	2.617	0.00591159	SQP2
AT5G24290	409.266	204.015	1.00347	7.73e-05	176.267	1.21411	1.38949e-05	MEB2
AT5G24530	1138.42	468.937	1.27954	1.27e-06	273.11	2.06014	1.32483e-11	DMR6
AT5G24660	92.0993	2.95425	4.94245	2.26e-15	3.60512	4.65762	9.46569e-11	LSU2
AT5G24770	42.3112	11.4898	1.88459	0.00381952	3.37988	3.65219	6.0542e-05	VSP2
AT5G24780	74.486	15.0724	2.30579	7.57e-06	2.60018	4.82374	3.82357e-06	VSP1
AT5G24900	23.9579	3.2688	2.85997	0.00154565	3.29862	2.84919	0.00110059	CYP714A2
AT5G24910	178.17	39.8139	2.15742	9.29e-08	40.3201	2.1403	5.44116e-05	CYP714A1
AT5G25180	26.4988	5.08432	2.38794	0.00737162	2.68979	3.30588	0.000671602	CYP71B14
AT5G25250	426.29	169.088	1.33374	0.00126408	165.344	1.36881	0.00123005	FLOT1
AT5G25260	77.6007	12.5665	2.62303	6.82e-05	17.6062	2.13998	0.000963585	FLOT2
AT5G25770	1303.81	613.501	1.0871	5.05e-08	509.397	1.35494	2.39157e-07	-
AT5G25820	408.318	102.038	2.00003	9.09e-12	130.968	1.63893	0.000225152	-
AT5G25830	170.606	47.8086	1.83354	7.1e-06	42.9615	1.98495	0.000414071	GATA12
AT5G25910	107.04	37.0091	1.53032	0.00783585	25.5985	2.06066	2.81307e-06	AtRLP52
AT5G25930	572.378	203.94	1.48854	3.8e-05	200.75	1.51179	0.000941621	-
AT5G25970	2.28059	30.7609	-3.74696	2.81e-05	72.1562	-4.97709	8.63161e-06	-
AT5G26200	64.1098	172.826	-1.43027	3.71e-05	190.641	-1.571	1.35327e-05	-
AT5G26220	71.3102	11.9965	2.57071	0.000402069	7.67327	3.21485	1.24596e-09	GGCT2;1
AT5G26260	1333.96	122.03	3.44896	1.44e-24	218.581	2.60853	2.78249e-07	-
AT5G26290	771.08	58.9166	3.70921	7.62e-07	60.5019	3.66897	0.00186767	-
AT5G26310	80.8124	4.04908	4.32502	1.73e-08	9.80624	3.03889	0.00666306	UGT72E3
AT5G26340	753.672	278.256	1.43776	6.24e-06	239.466	1.65478	3.07414e-08	STP13
AT5G26731	98.1927	36.7408	1.4132	0.00141732	41.6823	1.23373	0.00197411	-
AT5G27350	1877.73	910.83	1.04341	4.41e-07	856.027	1.13286	1.18292e-06	SFP1
AT5G27420	822.001	168.448	2.2862	9.86e-08	135.058	2.6037	4.04646e-07	ATL31
AT5G27990	23.3241	57.2452	-1.29742	0.00869638	84.6018	-1.86024	0.000434522	-
AT5G33290	521.749	216.435	1.26943	0.00014551	249.225	1.06646	0.00221251	XGD1
AT5G34940	327.289	91.7985	1.83364	7.6e-11	119.302	1.45404	0.000759342	AtGUS3
AT5G35050	10.18	0.314845	4.82269	0.00269483	0	5.7809	0.000707229	-
AT5G35370	593.004	294.717	1.00818	5.71e-05	275.245	1.10581	1.68326e-06	-
AT5G35580	214.923	72.5912	1.56341	0.00320693	70.4109	1.6074	0.00282439	-
AT5G35940	133.196	27.1396	2.28982	0.000686472	20.1896	2.71907	0.000736291	JAL41
AT5G36110	46.5787	4.84302	3.24629	2.97e-05	9.29002	2.32138	0.000629456	CYP716A1
AT5G36130	58.6453	2.60917	4.46449	6.34e-11	3.90027	3.90017	0.00071899	-
AT5G36140	93.9916	3.41998	4.80146	4.28e-13	5.25592	4.15167	1.30638e-06	CYP716A2
AT5G36150	68.0188	2.23415	4.88557	1.88e-09	6.53749	3.37003	0.00109357	PEN3
AT5G37210	71.7753	11.7259	2.60575	0.000209341	15.2516	2.23147	0.00456595	-
AT5G37260	167.511	66.2684	1.33468	0.000212244	72.1065	1.21306	0.0034682	RVE2
AT5G37500	354.378	152.759	1.21372	0.000154488	138.831	1.34977	9.16563e-06	GORK
AT5G37690	314.069	44.0715	2.83214	5.42e-06	38.965	3.0072	2.31453e-05	-
AT5G37740	1377.61	366.271	1.91078	3.01e-09	443.626	1.63244	5.20832e-06	-
AT5G37800	22.9422	1.6344	3.79281	0.000264354	1.31861	4.10629	0.000249359	BHLH86
AT5G37940	11.4908	0.659778	4.10799	0.00250273	0.650045	4.1123	0.00391857	-
AT5G37980	26.8862	3.89849	2.77175	0.00301184	1.96148	3.7583	0.000319684	-
AT5G37990	234.021	7.54231	4.94185	1.2e-20	25.4199	3.20012	2.70488e-05	-
AT5G38060	19.6466	63.8593	-1.70087	4.38e-05	46.9495	-1.25526	0.0042345	-
AT5G38710	269.7	41.1942	2.7062	1.65e-13	56.0036	2.26595	2.99195e-13	POX2
AT5G39080	133.85	268.103	-1.00171	7.48e-05	309.645	-1.209	0.00012138	-
AT5G39100	74.5184	8.00878	3.21613	2.37e-12	6.21247	3.5756	0.000209491	GLP6
AT5G39240	54.8552	21.0555	1.37573	0.00641518	22.8687	1.26248	0.00543127	-
AT5G39720	22.2621	2.32486	3.2546	0.000406955	0.343544	5.95171	1.84342e-05	AIG2LA
AT5G39820	15.3696	0.314845	5.41767	0.000239425	0.975067	3.9543	0.00255755	ANAC094
AT5G39890	286.242	71.1209	2.00979	1.23e-09	70.8966	2.01444	1.71277e-08	PCO2
AT5G39940	64.9887	152.672	-1.23202	0.00280552	142.53	-1.13057	0.00736682	-
AT5G40230	95.8545	10.8121	3.13498	3.63e-11	22.4988	2.08734	0.0027266	-
AT5G40240	1101.18	423.577	1.37814	6.8e-11	385.795	1.5129	4.48885e-09	-
AT5G40380	186.769	476.195	-1.35027	9.71e-13	564.416	-1.59528	2.17591e-08	CRK42
AT5G40690	498.347	128.149	1.95809	1.05e-18	132.297	1.91174	3.53195e-15	-
AT5G40730	788.449	113.122	2.79971	9.79e-21	165.291	2.25185	0.000303972	AGP24
AT5G40800	56.8202	11.6224	2.28513	2.27e-06	9.24163	2.61426	0.000994941	-
AT5G40860	64.5415	2.89378	4.45281	4.29e-07	4.63993	3.79073	5.5957e-07	-
AT5G41040	393.613	80.1244	2.29585	1.23e-06	89.3387	2.13648	0.00010047	HHT1
AT5G41080	8563.48	2757.9	1.63462	5.87e-15	3264.51	1.39143	2.08534e-07	GDPD2
AT5G41315	27.2193	5.33928	2.34861	0.000297712	3.95583	2.77415	0.00361894	GL3
AT5G41550	31.5426	8.9539	1.81268	0.00536805	7.30702	2.10319	0.000990937	-
AT5G41761	294.652	78.6439	1.90452	1.33e-12	95.9345	1.61858	9.82036e-07	-
AT5G42210	88.607	34.3753	1.3683	0.00136363	35.1293	1.33266	0.00258769	-
AT5G42250	324.144	42.0906	2.94124	3.66e-08	53.5624	2.5948	0.000394097	-
AT5G42380	69.514	2.29433	4.90389	2.53e-09	2.36777	4.88564	9.29855e-08	CML37
AT5G42530	2458.78	275.556	3.15765	0.00100654	211.288	3.54206	1.65154e-16	-
AT5G42580	264.369	24.443	3.4314	5.2e-12	24.9992	3.39677	2.91046e-06	CYP705A12
AT5G42590	112.773	7.40976	3.93266	5.04e-12	6.51897	4.10448	0.000101279	CYP71A16
AT5G42630	69.3197	11.9671	2.53073	3.47e-07	16.5516	2.06188	0.00769255	KAN4
AT5G42830	283.143	93.1895	1.60366	0.000428353	99.1909	1.51395	7.28324e-05	-
AT5G43150	214.736	53.9895	1.99043	5.93e-12	42.7016	2.32724	1.63645e-10	-
AT5G43300	55.7346	1.66449	5.06049	1.64e-10	1.37418	5.37036	3.41316e-09	GDPD3
AT5G43400	212.962	45.2471	2.23531	1.33e-08	61.5457	1.78821	0.00114154	-
AT5G43420	93.165	33.5775	1.47053	0.00048912	34.0676	1.44931	0.00240662	ATL16
AT5G44160	133.928	43.4159	1.62149	3.57e-07	60.7498	1.13778	6.47163e-05	NUC
AT5G44460	85.3445	14.9649	2.50233	2.21e-05	21.4754	1.987	0.00818903	CML43
AT5G44480	504.848	134.335	1.9084	2.17e-07	156.877	1.68443	0.00753147	DUR
AT5G44550	463.84	68.0947	2.76574	5.78e-10	79.8181	2.5359	8.98971e-06	-
AT5G44568	179.336	43.1014	2.05804	0.000184325	71.8173	1.32264	0.00432482	-
AT5G44570	16.9692	2.29418	2.87541	0.00736511	0	6.52355	3.43633e-05	-
AT5G44610	3359.01	323.63	3.37538	6.49e-05	510.715	2.71533	0.00155974	PCAP2
AT5G44820	159.866	58.232	1.45578	1.4e-05	69.9891	1.19071	0.000243402	-
AT5G44920	144.522	25.5819	2.49301	1.84e-06	30.1004	2.26104	2.72489e-08	TIK
AT5G45095	28.2478	0.344933	6.29506	3.2e-06	1.68068	4.07268	1.06236e-05	-
AT5G45200	47.0202	7.408	2.66816	0.00253467	6.21247	2.91135	0.00633512	-
AT5G45210	75.1186	12.5218	2.58694	0.00397145	9.26732	3.01472	0.000415216	-
AT5G45220	50.2465	14.4251	1.79519	0.0101325	9.89585	2.33724	0.000968297	-
AT5G45380	492.698	188.426	1.38605	0.000200914	209.903	1.23145	0.000872011	DUR3
AT5G45630	57.0314	15.0738	1.9198	0.00822488	8.44099	2.75449	0.00548925	-
AT5G45650	174.189	43.0576	2.01614	4.02e-07	74.488	1.22662	0.00558539	SBT5.6
AT5G45920	131.276	19.5395	2.74506	5.27e-07	23.1142	2.49919	2.92375e-05	-
AT5G46050	277.356	123.248	1.17	0.00395727	117.63	1.23994	0.00551878	NPF5.2
AT5G46060	30.159	5.21863	2.51868	0.00184986	4.98347	2.59169	0.000933093	-
AT5G46230	155.993	44.6462	1.80583	2.77e-05	50.6879	1.61931	0.00099098	-
AT5G46890	457.597	18.578	4.62097	0.000719517	25.9773	4.13603	0.000231451	-
AT5G47050	751.112	251.036	1.5806	1.6e-14	280.43	1.41965	8.57562e-06	-
AT5G47230	286.536	92.727	1.62593	4.02e-09	90.5892	1.65933	5.95157e-05	ERF5
AT5G47240	92.4488	39.5326	1.22645	0.00052018	32.0446	1.52709	1.72896e-05	atnudt8
AT5G47450	271.297	52.6346	2.36362	4.45e-06	60.8276	2.15587	0.00104244	TIP2-3
AT5G47530	85.1098	6.04237	3.7972	1.36e-05	8.90526	3.24993	0.000502692	-
AT5G47635	45.9441	7.22835	2.6562	2.71e-06	6.32061	2.85577	1.03244e-06	-
AT5G47740	605.785	88.3334	2.7771	0.00260736	83.1358	2.86251	7.68423e-06	-
AT5G47910	1464.83	445.748	1.71618	1.8e-06	505.297	1.53713	0.000428517	RBOHD
AT5G47960	78.7961	22.0153	1.83841	1.14e-05	25.8739	1.60214	0.00110933	RABA4C
AT5G48010	2573.95	145.354	4.14581	5.93e-12	193.388	3.73207	0.00464938	THAS1
AT5G48070	65.5285	15.671	2.06337	0.0017206	8.9423	2.86983	0.00278106	XTH20
AT5G48110	535.773	207.808	1.36489	1.31e-05	170.233	1.65187	0.00133421	-
AT5G48170	48.6894	14.7282	1.72504	0.00140645	13.9855	1.79563	0.00710645	SNE
AT5G48400	93.9104	19.5707	2.25811	1.2e-08	20.2082	2.21312	0.0083437	GLR1.2
AT5G48470	233.154	534.856	-1.19756	1.58e-05	573.576	-1.29748	1.27266e-05	PRDA1
AT5G48657	368.25	54.8665	2.74602	0.0043735	86.2678	2.09308	0.00279192	-
AT5G48850	329.354	20.2007	4.02193	3.05e-26	17.7078	4.21611	0.00173064	SDI1
AT5G49350	129.798	10.5567	3.61303	4.86e-11	24.8666	2.37996	0.000566941	-
AT5G49620	54.8288	11.2031	2.29734	0.000150529	15.5079	1.81595	0.00399305	AtMYB78
AT5G49900	388.605	137.04	1.50301	4.77e-06	152.789	1.34446	0.000122809	-
AT5G50260	70.0383	6.78037	3.3748	5.69e-06	13.173	2.40279	0.00134756	CEP1
AT5G50300	46.2043	8.81826	2.39531	0.000621959	6.92943	2.73084	0.000527928	AZG2
AT5G50790	220.552	45.4136	2.28192	8.03e-06	74.9784	1.55235	0.00822026	SWEET10
AT5G51060	180.045	25.072	2.84194	2.15e-05	48.4958	1.8883	0.00826239	RBOHC
AT5G51160	40.1292	4.55856	3.1201	1.43e-05	6.96647	2.51942	0.00148464	-
AT5G51465	19.5656	1.34964	3.86549	0.00106117	0.343544	5.76783	0.000160891	-
AT5G51490	37.7088	0.689866	5.80993	1.44e-06	4.91238	2.93171	0.00515516	PME59
AT5G51520	21.9311	0.314845	5.93036	4.23e-05	2.69279	3.02866	0.00353745	-
AT5G51780	438.364	101.249	2.11175	7.33e-07	106.704	2.03601	0.000796968	-
AT5G51930	22.9385	4.01899	2.51413	0.00148591	3.66786	2.64239	0.00329571	-
AT5G52260	17.6788	0.629689	4.74495	0.000311414	1.37418	3.70469	0.00293285	AtMYB19
AT5G52320	118.185	34.0563	1.79183	1.69e-05	27.0348	2.1285	0.00614824	CYP96A4
AT5G52570	82.8143	309.181	-1.89957	3.88e-10	312.382	-1.9141	5.9941e-08	BETA-OHASE 2
AT5G52720	12.1301	1.3197	3.18837	0.00337608	0.668567	4.17989	0.00176733	-
AT5G52760	53.7923	7.00303	2.94082	0.000732058	4.03828	3.74238	8.65888e-06	HIPP14
AT5G53048	94.0415	11.7122	3.00586	4.61e-09	11.6673	3.00733	6.15316e-13	-
AT5G53250	448.422	57.4195	2.96047	5.19e-17	188.387	1.24984	0.000710313	AGP22
AT5G54140	141.362	63.2429	1.16066	0.000244604	70.4139	1.00365	0.00155912	ILL3
AT5G54230	81.2182	8.48699	3.24739	8.8e-07	19.0234	2.0908	0.00295905	MYB49
AT5G54490	120.947	36.351	1.73097	6.31e-05	40.9313	1.55905	0.00109845	PBP1
AT5G54700	38.3559	10.3928	1.88531	0.00107778	9.32407	2.03678	0.000293595	-
AT5G54840	205.937	66.3014	1.63394	1.45e-07	55.7168	1.88267	0.000166928	SGP1
AT5G55050	231.314	93.539	1.30661	0.000340808	78.1857	1.56214	0.000260874	-
AT5G55170	102.034	28.749	1.82192	3.71e-07	27.894	1.86762	0.000101417	SUMO3
AT5G55220	911.247	1823.9	-1.00104	2.47e-06	2021.71	-1.14921	1.17254e-05	TIG
AT5G55560	154.238	55.9531	1.45911	6.51e-07	52.2849	1.55798	6.95727e-06	WNK11
AT5G55590	77.4167	13.1224	2.56402	1.19e-07	15.6578	2.30374	0.00326883	QRT1
AT5G56320	256.162	28.7653	3.15488	2.13e-21	35.4627	2.851	1.67984e-16	ATEXPA14
AT5G56540	659.476	62.938	3.3854	2.75e-25	101.523	2.69736	7.62736e-13	AGP14
AT5G56840	33.4603	5.71357	2.55241	0.00140664	6.32778	2.40023	0.000993733	-
AT5G57070	557.894	259.074	1.10575	6.65e-07	231.396	1.26737	3.76796e-06	-
AT5G57090	639.847	140.741	2.18358	2.71e-10	199.7	1.67733	0.00106794	PIN2
AT5G57400	37.784	2.92416	3.67128	1.83e-05	3.31714	3.50055	4.23397e-05	-
AT5G57510	72.7645	13.8571	2.38601	1.2e-06	9.06597	3.00721	9.93159e-09	-
AT5G57620	86.6179	12.101	2.83031	1.24e-06	14.5573	2.56819	0.000175762	MYB36
AT5G57670	81.1122	269.226	-1.73151	1.64e-11	205.663	-1.34388	2.58161e-07	-
AT5G57920	27.2287	4.87355	2.46487	0.000953348	3.99288	2.76513	0.00156732	ENODL10
AT5G57980	39.267	10.4232	1.91659	0.0011731	11.267	1.79784	0.00576869	NRPB5L1
AT5G58010	175.211	13.0152	3.74464	1.74e-06	26.2766	2.73435	0.00276034	BHLH82
AT5G58670	143.3	65.3992	1.1304	0.00421901	37.4146	1.93571	5.36733e-06	PLC1
AT5G58730	452.571	207.485	1.12497	1.82e-06	213.44	1.08235	0.000508025	-
AT5G58750	45.2718	5.27822	3.09422	0.000182006	15.6602	1.52798	0.00764622	-
AT5G58784	31.0791	2.86369	3.41236	0.000660876	1.98001	3.96024	1.24069e-05	-
AT5G58860	943.821	112.598	3.06681	9.58e-05	161.671	2.54378	0.00886265	CYP86A1
AT5G59270	17.424	2.38459	2.88019	0.00669685	2.02422	3.10662	0.00670894	-
AT5G59310	96.7573	19.2147	2.33312	0.00478321	8.47748	3.50936	0.00244524	LTP4
AT5G59470	79.1486	35.8297	1.14376	0.000861281	32.3284	1.28833	0.00228101	-
AT5G59490	39.6846	10.2723	1.94557	0.00104121	10.3619	1.93543	0.00141363	-
AT5G59700	246.157	98.7983	1.31497	3.47e-06	79.4506	1.62882	3.07047e-05	-
AT5G59820	323.548	90.5746	1.83676	1.7e-10	63.8853	2.34107	1.51827e-15	ZAT12
AT5G60630	39.5903	14.9218	1.40448	0.00583898	15.3949	1.36374	0.00541575	-
AT5G60660	849.839	74.9844	3.50111	1.71e-22	203.726	2.05994	0.000449364	PIP2-4
AT5G60950	244.015	41.4479	2.55403	1.36e-08	50.7883	2.26129	3.7641e-08	COBL5
AT5G61010	403.262	161.261	1.32221	1.35e-05	137.303	1.55417	3.1143e-07	ATEXO70E2
AT5G61250	525.085	201.707	1.37899	9.9e-09	189.942	1.46511	9.63132e-06	AtGUS1
AT5G61340	265.807	75.672	1.81131	1.65e-06	102.931	1.36765	0.0076593	-
AT5G61430	211.494	59.8184	1.81997	2.94e-05	63.6452	1.72968	0.000215466	NAC100
AT5G61550	120.744	6.59807	4.18699	1.58e-09	15.705	2.93947	0.00406694	-
AT5G61600	1688.46	670.728	1.33191	5.98e-06	840.279	1.00507	0.00294503	ERF104
AT5G62160	34.8304	4.42395	2.98393	0.00237722	2.72983	3.6833	0.000302779	ZIP12
AT5G62165	194.994	18.1293	3.42268	2.09e-09	31.906	2.60693	0.000941624	AGL42
AT5G62280	628.147	2203.5	-1.81055	4.77e-27	1774.3	-1.49914	5.87777e-09	-
AT5G62770	275.869	131.313	1.07036	0.000948056	135.992	1.01748	0.00249015	-
AT5G62820	67.986	26.333	1.36309	0.00318282	27.3234	1.31132	0.00127343	-
AT5G63130	175.455	31.5239	2.47788	6.78e-12	32.4335	2.43388	4.4261e-16	-
AT5G63310	863.632	1749.1	-1.01811	8.88e-10	1912.68	-1.14759	2.92762e-10	NDPK2
AT5G63590	259.046	43.3961	2.57525	5.09e-06	41.5025	2.63852	0.000326844	FLS3
AT5G63660	67.7483	4.61844	3.86736	1.77e-06	15.6065	2.11256	0.00713779	PDF2.5
AT5G63970	455.532	133.487	1.7699	2.51e-11	99.0786	2.19796	1.1551e-06	RGLG3
AT5G64120	2362.48	469.374	2.33151	0.00284951	992.968	1.25285	0.00481796	PER71
AT5G64810	35.0948	3.35936	3.38892	3.29e-06	2.0057	4.12632	2.33781e-06	WRKY51
AT5G64905	26.9448	3.61403	2.88478	0.000109927	4.98765	2.42627	0.000361087	PEP3
AT5G65010	1125.41	4057.22	-1.85002	8.12e-11	4062.43	-1.85257	1.98858e-09	ASN2
AT5G65040	110.77	17.1561	2.68427	4.21e-09	26.9458	2.03458	1.45245e-05	IRM1
AT5G65207	797.156	353.449	1.17277	8.31e-05	311.802	1.35192	1.19025e-05	-
AT5G65210	2722.8	1302.35	1.06379	0.000567699	1184.57	1.19853	0.000366075	TGA1
AT5G65300	130.91	51.5647	1.34462	1.05e-05	53.8216	1.28108	0.000234902	-
AT5G65500	57.3923	10.1519	2.48882	1.67e-05	6.62711	3.10662	4.2383e-07	-
AT5G65530	260.416	54.6453	2.25022	2.08e-06	65.4167	1.98959	0.0057595	-
AT5G65640	1263.19	509.589	1.30976	7.28e-20	496.66	1.34681	4.3491e-09	BHLH93
AT5G65690	114.33	26.2433	2.11942	0.000466946	28.1443	2.02241	0.000517748	PCK2
AT5G66170	3285.04	946.173	1.79544	3.71e-15	892.648	1.87849	1.68312e-11	STR18
AT5G66630	227.356	105.955	1.09926	1.43e-06	82.8317	1.45456	4.58501e-05	DAR5
AT5G66670	88.6582	25.1943	1.811	2.57e-06	21.5477	2.03586	5.96917e-05	-
AT5G66870	114.642	33.1113	1.78894	6.75e-05	28.7298	1.9928	0.00776276	LBD36
AT5G67080	128.965	12.8519	3.32303	2.48e-06	14.7078	3.13563	1.28615e-05	MAPKKK19
AT5G67140	68.5711	28.0452	1.28903	0.000191815	25.0596	1.45028	4.11689e-05	-
AT5G67210	74.2951	21.3269	1.79935	0.000655338	20.1335	1.88074	0.00197559	IRX15-L
AT5G67340	167.412	57.3344	1.54669	3.46e-05	61.2356	1.44937	0.00052899	PUB2
AT5G67430	49.974	11.5915	2.10475	0.0020711	3.5866	3.78504	0.000118529	-
ATMG00020	1261.37	452.528	1.4785	9.7e-07	303.776	2.05392	4.5329e-12	RRN26
AT1G35612	303.129	94.2956	1.68228	1.26e-06	74.1444	2.02882	8.47021e-16	-
AT3G56275	50.6342	9.55247	2.39773	2.34e-05	10.2621	2.29527	0.000283807	-
AT3G42798	26.109	0	7.14395	1.27e-06	0	7.14562	2.08148e-06	-
AT1G43060	28.413	2.0398	3.81264	0.00015911	1.31144	4.42422	0.00020595	-
AT5G00545	94.8582	41.7643	1.17898	0.00390666	29.6762	1.67367	6.22993e-06	-
AT5G44417	1786.06	177.138	3.3334	5.65e-06	90.5008	4.2998	0.000474053	-
AT5G00650	8.87052	143.879	-4.02135	1.18e-17	110.907	-3.64647	2.03089e-15	-
AT1G28620	146.9	58.6813	1.32137	4.42e-05	49.1859	1.576	1.53474e-05	-
AT1G46552	75.541	7.66311	3.2986	4.36e-10	9.88569	2.92497	4.43908e-06	-
AT1G47590	26.545	3.23871	3.01784	0.00183736	2.98077	3.14752	0.00166038	-
AT2G11610	30.522	0	7.36869	3.8e-08	0.325022	6.40457	1.37552e-06	-
AT2G13190	34.6476	2.0696	4.08516	0.0001988	1.30009	4.71276	2.73053e-05	-
AT2G19200	35.443	4.21333	3.05476	0.000209402	3.99288	3.14582	0.000146066	-
AT1G31910	26.5478	4.3946	2.60313	0.00016063	3.35836	2.98493	3.1459e-05	-
AT2G17330	36.1949	4.21333	3.08642	0.000403902	1.95013	4.1919	0.000209858	-

## Sheet: Table S4
GO analysis of common DEGs in ZmBES1/BZR1-9 expressing lines
Category	GOID	Description	GeneRatio	BgRatio	pvalue	padj	geneID	geneName	Count
BP	GO:0009414	response to water deprivation	39/1144	391/23118	2.75733e-05	0.00123209	AT1G80710/AT5G01820/AT5G38710/AT3G19580/AT1G77120/AT1G67360/AT2G46680/AT5G26340/AT4G05590/AT3G56400/AT1G08920/AT5G58670/AT4G15910/AT1G56600/AT5G37500/AT3G23250/AT2G35930/AT3G50970/AT3G57540/AT5G20830/AT4G02280/AT1G62660/AT2G37040/AT4G23450/AT1G35720/AT2G47190/AT5G17960/AT5G60660/AT1G17950/AT1G43160/AT2G47800/AT1G52400/AT2G38340/AT5G59310/AT5G10230/AT1G48000/AT5G15960/AT3G13672/AT2G01830	DRS1/CIPK14/POX2/AZF2/ADH1/-/ATHB-7/STP13/-/WRKY70/ESL1/PLC1/ATDI21/GOLS2/GORK/MYB15/PUB23/XERO2/REM4.1/SUS1/SUS3/BFRUCT3/PAL1/AIRP1/ANN1/ATMYB2/-/PIP2-4/MYB52/RAP2-6/ABCC4/BGLU18/DREB2E/LTP4/ANNAT7/MYB112/KIN1/-/AHK4	39
BP	GO:0009753	response to jasmonic acid	41/1144	243/23118	5.11641e-12	1.22922e-09	AT5G05600/AT4G19810/AT4G32940/AT1G15380/AT2G24850/AT5G13930/AT1G47510/AT3G51440/AT1G74020/AT1G28480/AT5G63970/AT3G56400/AT1G61340/AT5G64810/AT5G24780/AT5G37500/AT3G16470/AT3G23250/AT1G70000/AT3G55970/AT2G39030/AT1G12160/AT4G26120/AT5G24770/AT3G03450/AT1G19180/AT3G52430/AT2G34810/AT3G51450/AT1G17380/AT2G38240/AT1G43160/AT1G70170/AT1G61120/AT3G44860/AT5G37260/AT5G41315/AT5G10280/AT3G23240/AT5G09980…	-/ChiC/GAMMA-VPE/-/TAT3/CHS/IP5P11/SSL6/SSL12/GRXC9/RGLG3/WRKY70/-/WRKY51/VSP1/GORK/JAL35/MYB15/-/JRG21/NATA1/-/-/VSP2/RGL2/TIFY10A/PAD4/-/SSL7/TIFY11A/ANS/RAP2-6/2MMP/GES/FAMT/RVE2/GL3/MYB92/ERF1B/PEP4/NPF5.2	41
BP	GO:0009991	response to extracellular stimulus	43/1144	275/23118	2.08279e-11	3.53658e-09	AT3G53900/AT5G20150/AT1G73010/AT2G45130/AT2G11810/AT3G05630/AT3G49580/AT2G45135/AT2G26660/AT5G24660/AT3G44320/AT2G02990/AT5G01220/AT2G30540/AT2G27190/AT4G17670/AT1G74020/AT5G20410/AT3G52190/AT5G27420/AT2G14210/AT5G65040/AT1G69480/AT3G04530/AT3G23430/AT3G55880/AT3G22550/AT2G47190/AT5G13080/AT3G08860/AT1G62300/AT1G55920/AT5G45380/AT1G29290/AT1G04770/AT1G53310/AT1G61120/AT5G48850/AT3G03520/AT1G63245…	UPP/SPX1/PS2/SPX3/MGD3/PLPZETA2/LSU1/-/SPX2/LSU2/NIT3/RNS1/SQD2/GRXS9/PAP12/FLZ2/SSL12/MGD2/PHF1/ATL31/ANR1/IRM1/PHO1-H10/PPCK2/PHO1/SUE4/FLZ8/ATMYB2/WRKY75/PYD4/WRKY6/SAT1/DUR3/CEP14/-/PPC1/GES/SDI1/NPC3/CLE14/-/AHK4/RBOHC	43
BP	GO:0031668	cellular response to extracellular stimulus	36/1144	212/23118	8.38519e-11	1.18651e-08	AT3G53900/AT5G20150/AT1G73010/AT2G45130/AT2G11810/AT3G05630/AT3G49580/AT2G45135/AT2G26660/AT5G24660/AT3G44320/AT2G02990/AT5G01220/AT2G30540/AT2G27190/AT1G74020/AT5G20410/AT3G52190/AT5G27420/AT1G69480/AT3G04530/AT3G23430/AT3G55880/AT2G47190/AT3G08860/AT1G62300/AT1G55920/AT5G45380/AT1G29290/AT1G04770/AT1G53310/AT5G48850/AT3G03520/AT1G63245/AT1G43910/AT2G01830	UPP/SPX1/PS2/SPX3/MGD3/PLPZETA2/LSU1/-/SPX2/LSU2/NIT3/RNS1/SQD2/GRXS9/PAP12/SSL12/MGD2/PHF1/ATL31/PHO1-H10/PPCK2/PHO1/SUE4/ATMYB2/PYD4/WRKY6/SAT1/DUR3/CEP14/-/PPC1/SDI1/NPC3/CLE14/-/AHK4	36
BP	GO:0071496	cellular response to external stimulus	36/1144	218/23118	1.88497e-10	2.46206e-08	AT3G53900/AT5G20150/AT1G73010/AT2G45130/AT2G11810/AT3G05630/AT3G49580/AT2G45135/AT2G26660/AT5G24660/AT3G44320/AT2G02990/AT5G01220/AT2G30540/AT2G27190/AT1G74020/AT5G20410/AT3G52190/AT5G27420/AT1G69480/AT3G04530/AT3G23430/AT3G55880/AT2G47190/AT3G08860/AT1G62300/AT1G55920/AT5G45380/AT1G29290/AT1G04770/AT1G53310/AT5G48850/AT3G03520/AT1G63245/AT1G43910/AT2G01830	UPP/SPX1/PS2/SPX3/MGD3/PLPZETA2/LSU1/-/SPX2/LSU2/NIT3/RNS1/SQD2/GRXS9/PAP12/SSL12/MGD2/PHF1/ATL31/PHO1-H10/PPCK2/PHO1/SUE4/ATMYB2/PYD4/WRKY6/SAT1/DUR3/CEP14/-/PPC1/SDI1/NPC3/CLE14/-/AHK4	36
BP	GO:0009751	response to salicylic acid	38/1144	231/23118	6.6538e-11	1.02711e-08	AT1G44830/AT5G24530/AT3G45860/AT4G32940/AT1G15380/AT3G51440/AT1G28480/AT3G56400/AT1G61340/AT3G61190/AT1G70000/AT3G50930/AT1G12160/AT4G23130/AT3G03450/AT1G79680/AT4G39030/AT3G52430/AT2G47190/AT3G51450/AT5G17960/AT1G34670/AT1G43160/AT1G35515/AT1G66700/AT5G01900/AT3G49690/AT1G73260/AT5G54230/AT3G44860/AT4G25560/AT5G37260/AT1G48000/AT5G10280/AT5G44568/AT5G46050/AT5G03350/AT3G48920	ERF014/DMR6/CRK4/GAMMA-VPE/-/SSL6/GRXC9/WRKY70/-/BAP1/-/HSR4/-/CRK5/RGL2/WAKL10/DTX47/PAD4/ATMYB2/SSL7/-/AtMYB93/RAP2-6/MYB8/PXMT1/WRKY62/RAX3/KTI1/MYB49/FAMT/LAF1/RVE2/MYB112/MYB92/-/NPF5.2/LLP/AtMYB45	38
BP	GO:0031667	response to nutrient levels	43/1144	236/23118	1.01682e-13	1.0713e-10	AT3G53900/AT5G20150/AT1G73010/AT2G45130/AT2G11810/AT3G05630/AT3G49580/AT2G45135/AT2G26660/AT5G24660/AT3G44320/AT2G02990/AT5G01220/AT2G30540/AT2G27190/AT4G17670/AT1G74020/AT5G20410/AT3G52190/AT5G27420/AT2G14210/AT5G65040/AT1G69480/AT3G04530/AT3G23430/AT3G55880/AT3G22550/AT2G47190/AT5G13080/AT3G08860/AT1G62300/AT1G55920/AT5G45380/AT1G29290/AT1G04770/AT1G53310/AT1G61120/AT5G48850/AT3G03520/AT1G63245…	UPP/SPX1/PS2/SPX3/MGD3/PLPZETA2/LSU1/-/SPX2/LSU2/NIT3/RNS1/SQD2/GRXS9/PAP12/FLZ2/SSL12/MGD2/PHF1/ATL31/ANR1/IRM1/PHO1-H10/PPCK2/PHO1/SUE4/FLZ8/ATMYB2/WRKY75/PYD4/WRKY6/SAT1/DUR3/CEP14/-/PPC1/GES/SDI1/NPC3/CLE14/-/AHK4/RBOHC	43
BP	GO:0009267	cellular response to starvation	34/1144	154/23118	1.28637e-13	1.0713e-10	AT3G53900/AT5G20150/AT1G73010/AT2G45130/AT2G11810/AT3G05630/AT3G49580/AT2G45135/AT2G26660/AT5G24660/AT3G44320/AT2G02990/AT5G01220/AT2G30540/AT2G27190/AT1G74020/AT5G20410/AT3G52190/AT1G69480/AT3G04530/AT3G23430/AT3G55880/AT2G47190/AT1G62300/AT1G55920/AT5G45380/AT1G29290/AT1G04770/AT1G53310/AT5G48850/AT3G03520/AT1G63245/AT1G43910/AT2G01830	UPP/SPX1/PS2/SPX3/MGD3/PLPZETA2/LSU1/-/SPX2/LSU2/NIT3/RNS1/SQD2/GRXS9/PAP12/SSL12/MGD2/PHF1/PHO1-H10/PPCK2/PHO1/SUE4/ATMYB2/WRKY6/SAT1/DUR3/CEP14/-/PPC1/SDI1/NPC3/CLE14/-/AHK4	34
BP	GO:0031669	cellular response to nutrient levels	36/1144	174/23118	2.00324e-13	1.0713e-10	AT3G53900/AT5G20150/AT1G73010/AT2G45130/AT2G11810/AT3G05630/AT3G49580/AT2G45135/AT2G26660/AT5G24660/AT3G44320/AT2G02990/AT5G01220/AT2G30540/AT2G27190/AT1G74020/AT5G20410/AT3G52190/AT5G27420/AT1G69480/AT3G04530/AT3G23430/AT3G55880/AT2G47190/AT3G08860/AT1G62300/AT1G55920/AT5G45380/AT1G29290/AT1G04770/AT1G53310/AT5G48850/AT3G03520/AT1G63245/AT1G43910/AT2G01830	UPP/SPX1/PS2/SPX3/MGD3/PLPZETA2/LSU1/-/SPX2/LSU2/NIT3/RNS1/SQD2/GRXS9/PAP12/SSL12/MGD2/PHF1/ATL31/PHO1-H10/PPCK2/PHO1/SUE4/ATMYB2/PYD4/WRKY6/SAT1/DUR3/CEP14/-/PPC1/SDI1/NPC3/CLE14/-/AHK4	36
BP	GO:0019748	secondary metabolic process	58/1144	403/23118	2.52367e-13	1.0713e-10	AT5G22500/AT1G17180/AT3G44320/AT3G11430/AT5G65640/AT1G80820/AT1G62570/AT1G69930/AT1G69920/AT1G27140/AT2G44460/AT2G40370/AT3G28740/AT3G44540/AT1G17190/AT4G37990/AT3G16390/AT3G27190/AT4G37400/AT1G73500/AT3G44550/AT1G12160/AT1G74590/AT5G23190/AT2G29460/AT2G25160/AT2G37040/AT5G41040/AT4G34230/AT2G43000/AT3G19450/AT3G21230/AT5G09640/AT3G52430/AT2G23010/AT4G13660/AT2G30840/AT2G44450/AT5G12270/AT1G76790…	FAR1/GSTU25/NIT3/GPAT5/BHLH93/CCR2/FMOGS-OX4/GSTU11/GSTU12/GSTU14/BGLU28/LAC5/CYP81D11/FAR4/GSTU26/CAD8/NSP3/UKL2/CYP81F3/MKK9/FAR5/-/GSTU10/CYP86B1/GSTU4/CYP82F1/PAL1/HHT1/CAD5/JUB1/CAD4/4CL4/SCPL19/PAD4/SCPL9/PRR2/-/BGLU15/-/IGMT5/GSTU27/NSP1/PAL4/-/SDI1/BGLU18/TGG4/4CL2/SCPL11/CCOAMT/CYP81F4/PER71/-/SCPL12/GSTU28/CYP82C2/BGLU46/CYP86A1	58
BP	GO:0042594	response to starvation	37/1144	189/23118	5.56405e-13	1.88955e-10	AT3G53900/AT5G20150/AT1G73010/AT2G45130/AT2G11810/AT3G05630/AT3G49580/AT2G45135/AT2G26660/AT5G24660/AT3G44320/AT2G02990/AT5G01220/AT2G30540/AT2G27190/AT4G17670/AT1G74020/AT5G20410/AT3G52190/AT5G65040/AT1G69480/AT3G04530/AT3G23430/AT3G55880/AT3G22550/AT2G47190/AT1G62300/AT1G55920/AT5G45380/AT1G29290/AT1G04770/AT1G53310/AT5G48850/AT3G03520/AT1G63245/AT1G43910/AT2G01830	UPP/SPX1/PS2/SPX3/MGD3/PLPZETA2/LSU1/-/SPX2/LSU2/NIT3/RNS1/SQD2/GRXS9/PAP12/FLZ2/SSL12/MGD2/PHF1/IRM1/PHO1-H10/PPCK2/PHO1/SUE4/FLZ8/ATMYB2/WRKY6/SAT1/DUR3/CEP14/-/PPC1/SDI1/NPC3/CLE14/-/AHK4	37
BP	GO:0009611	response to wounding	38/1144	204/23118	1.3627e-12	3.85644e-10	AT5G22500/AT1G44830/AT5G59820/AT2G02990/AT4G32940/AT2G24850/AT5G13930/AT3G51440/AT1G74020/AT5G63970/AT1G61340/AT1G52030/AT3G44540/AT3G16470/AT3G61190/AT1G73500/AT5G47240/AT3G44550/AT5G24770/AT1G19180/AT5G10300/AT2G34810/AT3G51450/AT1G17380/AT1G76690/AT5G47910/AT1G20510/AT1G43160/AT1G72520/AT3G25250/AT4G20140/AT1G61120/AT2G47800/AT3G13790/AT1G73260/AT1G76650/AT3G44860/AT5G46050	FAR1/ERF014/ZAT12/RNS1/GAMMA-VPE/TAT3/CHS/SSL6/SSL12/RGLG3/-/F-ATMBP/FAR4/JAL35/BAP1/MKK9/atnudt8/FAR5/VSP2/TIFY10A/HNL/-/SSL7/TIFY11A/OPR2/RBOHD/4CLL5/RAP2-6/LOX4/OXI1/GSO1/GES/ABCC4/CWINV1/KTI1/CML38/FAMT/NPF5.2	38
BP	GO:0046677	response to antibiotic	50/1144	342/23118	6.32971e-12	1.22922e-09	AT5G63310/AT1G44830/AT3G17790/AT1G08650/AT1G77120/AT5G24530/AT3G45860/AT4G32940/AT1G15380/AT5G42380/AT3G51440/AT1G28480/AT3G56400/AT1G61340/AT3G61190/AT1G70000/AT3G50930/AT1G12160/AT4G23130/AT3G03450/AT1G79680/AT4G39030/AT3G04530/AT3G52430/AT2G47190/AT3G51450/AT5G17960/AT1G34670/AT1G43160/AT1G35515/AT1G66700/AT1G72520/AT5G12270/AT2G06050/AT5G01900/AT1G52560/AT3G49690/AT1G73260/AT5G54230/AT3G44860…	NDPK2/ERF014/PAP17/PPCK1/ADH1/DMR6/CRK4/GAMMA-VPE/-/CML37/SSL6/GRXC9/WRKY70/-/BAP1/-/HSR4/-/CRK5/RGL2/WAKL10/DTX47/PPCK2/PAD4/ATMYB2/SSL7/-/AtMYB93/RAP2-6/MYB8/PXMT1/LOX4/-/OPR3/WRKY62/HSP26.5/RAX3/KTI1/MYB49/FAMT/LAF1/RVE2/MYB112/MYB92/HSP17.6B/-/NPF5.2/LLP/AHK5/AtMYB45	50
BP	GO:0016036	cellular response to phosphate starvation	22/1144	75/23118	6.51528e-12	1.22922e-09	AT3G53900/AT5G20150/AT1G73010/AT2G45130/AT2G11810/AT3G05630/AT2G45135/AT2G26660/AT2G02990/AT5G01220/AT2G27190/AT5G20410/AT3G52190/AT1G69480/AT3G04530/AT3G23430/AT2G47190/AT1G62300/AT1G53310/AT3G03520/AT1G63245/AT2G01830	UPP/SPX1/PS2/SPX3/MGD3/PLPZETA2/-/SPX2/RNS1/SQD2/PAP12/MGD2/PHF1/PHO1-H10/PPCK2/PHO1/ATMYB2/WRKY6/PPC1/NPC3/CLE14/AHK4	22
BP	GO:0010200	response to chitin	25/1144	138/23118	1.65076e-08	1.91067e-06	AT2G21210/AT1G64380/AT5G59820/AT1G49900/AT3G19580/AT5G04340/AT5G27420/AT3G56400/AT5G25910/AT2G33580/AT3G23250/AT4G17490/AT2G29060/AT2G35930/AT4G17500/AT5G47230/AT4G26120/AT3G46080/AT5G17960/AT1G62300/AT1G71520/AT2G31230/AT3G50260/AT2G35000/AT3G46090	-/ERF061/ZAT12/-/AZF2/ZAT6/ATL31/WRKY70/AtRLP52/LYK5/MYB15/ERF6/SCL33/PUB23/ERF1A/ERF5/-/ZAT8/-/WRKY6/ERF020/ERF15/ERF011/ATL9/ZAT7	25
BP	GO:0044550	secondary metabolite biosynthetic process	29/1144	179/23118	1.68788e-08	1.91067e-06	AT5G22500/AT3G11430/AT1G80820/AT1G62570/AT3G44540/AT4G37990/AT3G27190/AT1G73500/AT3G44550/AT1G12160/AT5G23190/AT2G37040/AT5G41040/AT4G34230/AT2G43000/AT3G19450/AT3G21230/AT3G52430/AT4G13660/AT2G30840/AT5G12270/AT1G76790/AT3G10340/AT1G04770/AT5G48850/AT1G67980/AT4G19370/AT1G61820/AT5G58860	FAR1/GPAT5/CCR2/FMOGS-OX4/FAR4/CAD8/UKL2/MKK9/FAR5/-/CYP86B1/PAL1/HHT1/CAD5/JUB1/CAD4/4CL4/PAD4/PRR2/-/-/IGMT5/PAL4/-/SDI1/CCOAMT/-/BGLU46/CYP86A1	29
BP	GO:0009699	phenylpropanoid biosynthetic process	20/1144	96/23118	3.92676e-08	4.16728e-06	AT5G22500/AT3G11430/AT1G80820/AT3G44540/AT4G37990/AT3G27190/AT3G44550/AT5G23190/AT2G37040/AT5G41040/AT4G34230/AT3G19450/AT3G21230/AT4G13660/AT5G12270/AT3G10340/AT1G67980/AT4G19370/AT1G61820/AT5G58860	FAR1/GPAT5/CCR2/FAR4/CAD8/UKL2/FAR5/CYP86B1/PAL1/HHT1/CAD5/CAD4/4CL4/PRR2/-/PAL4/CCOAMT/-/BGLU46/CYP86A1	20
BP	GO:0009636	response to toxic substance	44/1144	367/23118	5.71716e-08	5.71044e-06	AT5G63310/AT3G17790/AT3G49580/AT1G08650/AT1G45145/AT1G17180/AT1G77120/AT5G24660/AT3G49570/AT5G05600/AT3G49120/AT1G69930/AT1G69920/AT2G37130/AT1G27140/AT1G67600/AT1G17190/AT4G37520/AT5G15180/AT1G68850/AT2G35380/AT1G74590/AT2G29460/AT4G22110/AT1G35720/AT3G04530/AT3G32980/AT1G19230/AT5G42250/AT5G47910/AT2G48150/AT5G12270/AT3G43800/AT4G29210/AT1G52560/AT1G64060/AT1G73260/AT2G29500/AT2G38390/AT5G64120…	NDPK2/PAP17/LSU1/PPCK1/TRX5/GSTU25/ADH1/LSU2/LSU3/-/PER34/GSTU11/GSTU12/PER21/GSTU14/-/GSTU26/PER50/PER56/PER11/PER20/GSTU10/GSTU4/-/ANN1/PPCK2/PER32/RBOHE/-/RBOHD/GPX4/-/GSTU27/GGT3/HSP26.5/RBOHF/KTI1/HSP17.6B/PER23/PER71/GSTU28/PER9/AHK5/RBOHC	44
BP	GO:0098754	detoxification	33/1144	244/23118	1.6121e-07	1.52075e-05	AT3G17790/AT3G49580/AT1G17180/AT1G77120/AT5G24660/AT3G49570/AT3G49120/AT1G69930/AT1G69920/AT2G37130/AT1G27140/AT1G67600/AT1G17190/AT4G37520/AT5G15180/AT1G68850/AT2G35380/AT1G74590/AT2G29460/AT4G22110/AT1G35720/AT3G32980/AT1G19230/AT5G42250/AT5G47910/AT2G48150/AT3G43800/AT1G64060/AT2G38390/AT5G64120/AT1G53680/AT1G44970/AT5G51060	PAP17/LSU1/GSTU25/ADH1/LSU2/LSU3/PER34/GSTU11/GSTU12/PER21/GSTU14/-/GSTU26/PER50/PER56/PER11/PER20/GSTU10/GSTU4/-/ANN1/PER32/RBOHE/-/RBOHD/GPX4/GSTU27/RBOHF/PER23/PER71/GSTU28/PER9/RBOHC	33
BP	GO:0009698	phenylpropanoid metabolic process	23/1144	137/23118	2.58646e-07	2.31148e-05	AT5G22500/AT3G11430/AT1G80820/AT2G40370/AT3G44540/AT4G37990/AT3G27190/AT3G44550/AT5G23190/AT2G37040/AT5G41040/AT4G34230/AT3G19450/AT3G21230/AT4G13660/AT5G12270/AT3G10340/AT3G21240/AT1G67980/AT5G64120/AT4G19370/AT1G61820/AT5G58860	FAR1/GPAT5/CCR2/LAC5/FAR4/CAD8/UKL2/FAR5/CYP86B1/PAL1/HHT1/CAD5/CAD4/4CL4/PRR2/-/PAL4/4CL2/CCOAMT/PER71/-/BGLU46/CYP86A1	23
BP	GO:0010243	response to organonitrogen compound	34/1144	277/23118	1.05163e-06	8.92832e-05	AT2G21210/AT1G64380/AT1G08650/AT5G59820/AT1G49900/AT3G19580/AT1G77120/AT5G04340/AT5G27420/AT3G56400/AT1G61340/AT5G25910/AT5G11210/AT2G33580/AT3G23250/AT4G17490/AT2G29060/AT2G35930/AT4G17500/AT5G47230/AT4G26120/AT4G13890/AT3G04530/AT3G46080/AT5G17960/AT1G62300/AT1G71520/AT2G31230/AT3G50260/AT2G35000/AT5G46050/AT5G51060/AT5G48400/AT3G46090	-/ERF061/PPCK1/ZAT12/-/AZF2/ADH1/ZAT6/ATL31/WRKY70/-/AtRLP52/GLR2.5/LYK5/MYB15/ERF6/SCL33/PUB23/ERF1A/ERF5/-/SHM5/PPCK2/ZAT8/-/WRKY6/ERF020/ERF15/ERF011/ATL9/NPF5.2/RBOHC/GLR1.2/ZAT7	34
BP	GO:0044262	cellular carbohydrate metabolic process	49/1144	485/23118	1.88847e-06	0.000152696	AT3G23730/AT3G54090/AT1G69200/AT4G14130/AT1G10550/AT2G21370/AT1G44830/AT1G14520/AT3G43190/AT4G33770/AT3G02040/AT2G28110/AT5G43300/AT5G60950/AT1G47510/AT4G10120/AT5G41080/AT4G26260/AT1G74210/AT4G24000/AT3G27190/AT3G44990/AT5G20830/AT4G02280/AT1G05610/AT1G02310/AT2G15390/AT1G62660/AT5G41040/AT2G43000/AT4G15290/AT3G02870/AT4G22590/AT5G58730/AT1G56550/AT2G30840/AT2G32610/AT4G15210/AT4G33330/AT2G15370…	XTH16/FLN1/FLN2/XTH15/XTH33/XK-1/ERF014/MIOX1/SUS4/ITPK2/GDPD1/IRX7/GDPD3/COBL5/IP5P11/SPS4/GDPD2/MIOX4/GDPD5/CSLG2/UKL2/XTH31/SUS1/SUS3/APS2/MAN1/FUT4/BFRUCT3/HHT1/JUB1/CSLB5/VTC4/TPPG/-/RGXT3/-/CSLB1/BAM5/PGSIP3/FUT5/ATSPP1/-/SDI1/IRX15-L/XTH20/SPP3A/CSLB2/DUR/TPPD	49
BP	GO:0014070	response to organic cyclic compound	46/1144	447/23118	2.35983e-06	0.00017612	AT1G44830/AT4G28720/AT1G08650/AT1G77120/AT5G24530/AT3G45860/AT4G32940/AT1G15380/AT3G51440/AT1G28480/AT3G56400/AT1G61340/AT3G61190/AT1G70000/AT3G50930/AT1G12160/AT4G23130/AT3G03450/AT4G13890/AT1G79680/AT4G39030/AT3G04530/AT3G52430/AT2G47190/AT3G51450/AT5G17960/AT1G34670/AT1G43160/AT1G35515/AT1G66700/AT5G01900/AT2G24000/AT3G49690/AT1G74500/AT1G73260/AT5G54230/AT3G44860/AT4G25560/AT5G37260/AT1G48000…	ERF014/YUC8/PPCK1/ADH1/DMR6/CRK4/GAMMA-VPE/-/SSL6/GRXC9/WRKY70/-/BAP1/-/HSR4/-/CRK5/RGL2/SHM5/WAKL10/DTX47/PPCK2/PAD4/ATMYB2/SSL7/-/AtMYB93/RAP2-6/MYB8/PXMT1/WRKY62/SCPL22/RAX3/PRE3/KTI1/MYB49/FAMT/LAF1/RVE2/MYB112/MYB92/-/NPF5.2/LLP/AtMYB45/RBOHC	46
BP	GO:0007568	aging	23/1144	155/23118	2.40208e-06	0.00017612	AT4G37770/AT5G02760/AT4G08040/AT1G73220/AT5G24530/AT3G21520/AT4G32940/AT3G04060/AT1G01480/AT1G64360/AT3G56400/AT1G17020/AT1G73500/AT1G11190/AT5G44160/AT2G43000/AT4G28530/AT3G52430/AT1G70170/AT5G62165/AT1G77450/AT5G44610/AT4G26200	ACS8/-/ACS11/OCT1/DMR6/DMP1/GAMMA-VPE/anac046/ACS2/-/WRKY70/SRG1/MKK9/ENDO1/NUC/JUB1/anac074/PAD4/2MMP/AGL42/NAC032/PCAP2/ACS7	23
BP	GO:0016042	lipid catabolic process	33/1144	275/23118	2.48933e-06	0.00017612	AT4G18970/AT4G28780/AT3G03530/AT3G05630/AT3G03310/AT3G02040/AT5G43300/AT5G65640/AT4G18550/AT5G41080/AT5G58670/AT2G44990/AT5G37690/AT2G31540/AT5G45920/AT4G32810/AT2G23540/AT3G50400/AT2G26560/AT5G49900/AT1G54020/AT3G52430/AT1G28590/AT1G72590/AT5G55050/AT1G74460/AT4G19230/AT3G47220/AT4G29800/AT1G53920/AT3G03520/AT1G28610/AT2G38010	-/-/NPC4/PLPZETA2/LCAT3/GDPD1/GDPD3/BHLH93/-/GDPD2/PLC1/CCD7/-/-/-/CCD8/-/-/PLP2/-/-/PAD4/-/PPRD1/-/-/CYP707A1/PLC9/PLP8/GLIP5/NPC3/-/-	33
BP	GO:0097237	cellular response to toxic substance	27/1144	202/23118	2.64036e-06	0.000179333	AT3G17790/AT3G49580/AT1G77120/AT5G24660/AT3G49570/AT5G05600/AT3G49120/AT2G37130/AT1G67600/AT4G37520/AT5G15180/AT1G68850/AT2G35380/AT4G22110/AT1G35720/AT3G32980/AT1G19230/AT5G42250/AT5G47910/AT2G48150/AT5G12270/AT1G64060/AT2G38390/AT5G64120/AT1G44970/AT5G10720/AT5G51060	PAP17/LSU1/ADH1/LSU2/LSU3/-/PER34/PER21/-/PER50/PER56/PER11/PER20/-/ANN1/PER32/RBOHE/-/RBOHD/GPX4/-/RBOHF/PER23/PER71/PER9/AHK5/RBOHC	27
BP	GO:0006790	sulfur compound metabolic process	44/1144	427/23118	3.75851e-06	0.00024546	AT5G22500/AT1G31910/AT1G17180/AT3G44320/AT5G26220/AT5G01220/AT1G62570/AT1G69930/AT1G69920/AT2G26400/AT1G27140/AT2G44460/AT3G22740/AT3G28740/AT3G44540/AT1G17190/AT3G13110/AT3G16390/AT4G37400/AT1G73500/AT3G44550/AT1G12160/AT1G74590/AT1G67810/AT2G29460/AT2G25160/AT2G43000/AT3G52430/AT4G21990/AT2G30840/AT2G44450/AT1G55920/AT1G76790/AT3G43800/AT4G29210/AT3G16400/AT1G04770/AT5G48850/AT1G52400/AT1G47600…	FAR1/PMK/GSTU25/NIT3/GGCT2;1/SQD2/FMOGS-OX4/GSTU11/GSTU12/ARD/GSTU14/BGLU28/HMT3/CYP81D11/FAR4/GSTU26/SAT3/NSP3/CYP81F3/MKK9/FAR5/-/GSTU10/SUFE2/GSTU4/CYP82F1/JUB1/PAD4/APR3/-/BGLU15/SAT1/IGMT5/GSTU27/GGT3/NSP1/-/SDI1/BGLU18/TGG4/CYP81F4/APR1/GSTU28/CYP82C2	44
BP	GO:0006979	response to oxidative stress	48/1144	486/23118	4.48054e-06	0.000281776	AT5G63310/AT3G17790/AT5G01820/AT5G59820/AT1G45145/AT1G77120/AT3G49120/AT5G13930/AT5G42380/AT2G37130/AT1G03850/AT1G19020/AT1G64360/AT3G56400/AT1G13340/AT1G56600/AT4G17490/AT1G14870/AT4G37520/AT5G15180/AT1G68850/AT2G35380/AT5G24770/AT1G75280/AT2G37040/AT1G60470/AT1G35720/AT3G32980/AT4G04810/AT4G04830/AT2G48150/AT1G72520/AT4G21840/AT3G25250/AT5G12270/AT2G06050/AT1G61120/AT1G52560/AT5G19875/AT1G73260…	NDPK2/PAP17/CIPK14/ZAT12/TRX5/ADH1/PER34/CHS/CML37/PER21/-/-/-/WRKY70/-/GOLS2/ERF6/PCR2/PER50/PER56/PER11/PER20/VSP2/-/PAL1/GOLS4/ANN1/PER32/MSRB4/MSRB5/GPX4/LOX4/MSRB8/OXI1/-/OPR3/GES/HSP26.5/-/KTI1/HSP17.6B/PER23/PER71/-/PER9/AHK5/ZAT7/TPPD	48
BP	GO:0042445	hormone metabolic process	34/1144	300/23118	6.26986e-06	0.000380223	AT4G37770/AT3G30180/AT4G13260/AT4G28720/AT4G08040/AT1G18870/AT5G24530/AT5G06300/AT1G73805/AT5G65640/AT4G35190/AT1G01480/AT1G73500/AT2G44990/AT4G15393/AT4G32810/AT2G37040/AT4G39030/AT3G52430/AT5G10300/AT1G76690/AT1G20510/AT5G36110/AT3G44300/AT3G25780/AT2G06050/AT2G42850/AT5G54140/AT4G29740/AT4G26200/AT4G15396/AT1G55320/AT4G35160/AT1G14120	ACS8/CYP85A2/YUC2/YUC8/ACS11/ICS2/DMR6/LOG7/SARD1/BHLH93/LOG5/ACS2/MKK9/CCD7/CYP702A5/CCD8/PAL1/DTX47/PAD4/HNL/OPR2/4CLL5/CYP716A1/NIT2/AOC3/OPR3/CYP718/ILL3/CKX4/ACS7/CYP702A6/AAE18/ASMT/-	34
BP	GO:0036293	response to decreased oxygen levels	14/1144	71/23118	8.33842e-06	0.000487927	AT3G43190/AT1G77120/AT5G57510/AT5G39890/AT2G47520/AT5G20830/AT2G26560/AT3G52430/AT5G64905/AT5G57090/AT5G25250/AT2G16060/AT4G33070/AT4G31970	SUS4/ADH1/-/PCO2/ERF071/SUS1/PLP2/PAD4/PEP3/PIN2/FLOT1/AHB1/PDC1/CYP82C2	14
BP	GO:0042446	hormone biosynthetic process	27/1144	215/23118	8.62062e-06	0.000487927	AT4G37770/AT3G30180/AT4G13260/AT4G28720/AT4G08040/AT1G18870/AT5G06300/AT1G73805/AT5G65640/AT4G35190/AT1G01480/AT1G73500/AT2G44990/AT4G15393/AT4G32810/AT4G39030/AT3G52430/AT1G76690/AT1G20510/AT5G36110/AT3G44300/AT3G25780/AT2G06050/AT2G42850/AT4G26200/AT4G15396/AT4G35160	ACS8/CYP85A2/YUC2/YUC8/ACS11/ICS2/LOG7/SARD1/BHLH93/LOG5/ACS2/MKK9/CCD7/CYP702A5/CCD8/DTX47/PAD4/OPR2/4CLL5/CYP716A1/NIT2/AOC3/OPR3/CYP718/ACS7/CYP702A6/ASMT	27
BP	GO:0070482	response to oxygen levels	14/1144	72/23118	9.88429e-06	0.000541404	AT3G43190/AT1G77120/AT5G57510/AT5G39890/AT2G47520/AT5G20830/AT2G26560/AT3G52430/AT5G64905/AT5G57090/AT5G25250/AT2G16060/AT4G33070/AT4G31970	SUS4/ADH1/-/PCO2/ERF071/SUS1/PLP2/PAD4/PEP3/PIN2/FLOT1/AHB1/PDC1/CYP82C2	14
BP	GO:0009395	phospholipid catabolic process	6/1144	12/23118	1.03514e-05	0.000549269	AT3G03530/AT3G05630/AT3G02040/AT5G43300/AT5G41080/AT3G03520	NPC4/PLPZETA2/GDPD1/GDPD3/GDPD2/NPC3	6
BP	GO:1901615	organic hydroxy compound metabolic process	37/1144	353/23118	1.49116e-05	0.000767269	AT3G30180/AT3G48720/AT1G14520/AT1G18870/AT1G31910/AT4G33770/AT3G02040/AT5G24530/AT1G73805/AT5G43300/AT1G47510/AT5G41080/AT4G26260/AT1G74210/AT5G58784/AT4G15393/AT1G11840/AT2G37040/AT4G39030/AT3G52430/AT5G10300/AT1G72590/AT2G23400/AT3G02870/AT4G19230/AT5G63590/AT5G58730/AT5G36110/AT2G44450/AT2G34500/AT2G47460/AT2G42850/AT4G18360/AT1G52400/AT4G15396/AT5G24140/AT2G38010	CYP85A2/-/MIOX1/ICS2/PMK/ITPK2/GDPD1/DMR6/SARD1/GDPD3/IP5P11/GDPD2/MIOX4/GDPD5/-/CYP702A5/ATGLX1/PAL1/DTX47/PAD4/HNL/PPRD1/-/VTC4/CYP707A1/FLS3/-/CYP716A1/BGLU15/CYP710A1/MYB12/CYP718/GLO5/BGLU18/CYP702A6/SQP2/-	37
BP	GO:0010817	regulation of hormone levels	41/1144	409/23118	1.54116e-05	0.000769674	AT1G70940/AT4G37770/AT3G30180/AT4G13260/AT4G28720/AT4G08040/AT1G18870/AT5G24530/AT5G06300/AT1G73805/AT5G65640/AT4G35190/AT2G47000/AT5G13930/AT1G01480/AT3G30350/AT2G17500/AT1G73500/AT2G44990/AT4G15393/AT4G32810/AT2G37040/AT1G02520/AT4G39030/AT3G52430/AT5G10300/AT1G76690/AT1G20510/AT5G36110/AT3G44300/AT3G25780/AT2G06050/AT5G57090/AT2G42850/AT5G54140/AT4G29740/AT4G26200/AT4G15396/AT1G55320/AT4G35160…	PIN3/ACS8/CYP85A2/YUC2/YUC8/ACS11/ICS2/DMR6/LOG7/SARD1/BHLH93/LOG5/ABCB4/CHS/ACS2/RGF4/PILS5/MKK9/CCD7/CYP702A5/CCD8/PAL1/ABCB11/DTX47/PAD4/HNL/OPR2/4CLL5/CYP716A1/NIT2/AOC3/OPR3/PIN2/CYP718/ILL3/CKX4/ACS7/CYP702A6/AAE18/ASMT/-	41
BP	GO:0009723	response to ethylene	34/1144	314/23118	1.66195e-05	0.000806284	AT1G44830/AT1G64380/AT3G20840/AT4G32940/AT3G51440/AT3G56400/AT2G47520/AT2G44940/AT3G23250/AT4G17490/AT1G73500/AT1G70000/AT4G17500/AT1G68765/AT5G47230/AT3G03450/AT3G52430/AT2G47190/AT3G51450/AT1G43160/AT3G60490/AT1G62300/AT1G71520/AT2G47460/AT2G31230/AT1G28370/AT5G57090/AT3G04720/AT3G50260/AT1G64060/AT5G61600/AT5G37260/AT3G23240/AT5G10720	ERF014/ERF061/PLT1/GAMMA-VPE/SSL6/WRKY70/ERF071/ERF034/MYB15/ERF6/MKK9/-/ERF1A/IDA/ERF5/RGL2/PAD4/ATMYB2/SSL7/RAP2-6/ERF035/WRKY6/ERF020/MYB12/ERF15/ERF11/PIN2/HEL/ERF011/RBOHF/ERF104/RVE2/ERF1B/AHK5	34
BP	GO:1990748	cellular detoxification	24/1144	190/23118	2.42712e-05	0.00114479	AT3G17790/AT3G49580/AT1G77120/AT5G24660/AT3G49570/AT3G49120/AT2G37130/AT1G67600/AT4G37520/AT5G15180/AT1G68850/AT2G35380/AT4G22110/AT1G35720/AT3G32980/AT1G19230/AT5G42250/AT5G47910/AT2G48150/AT1G64060/AT2G38390/AT5G64120/AT1G44970/AT5G51060	PAP17/LSU1/ADH1/LSU2/LSU3/PER34/PER21/-/PER50/PER56/PER11/PER20/-/ANN1/PER32/RBOHE/-/RBOHD/GPX4/RBOHF/PER23/PER71/PER9/RBOHC	24
BP	GO:0006720	isoprenoid metabolic process	27/1144	228/23118	2.51668e-05	0.00115495	AT5G52570/AT1G31910/AT5G65640/AT3G21500/AT3G14510/AT5G58784/AT3G45130/AT2G44990/AT4G32810/AT5G42590/AT3G29110/AT1G72590/AT2G23400/AT4G19230/AT5G36110/AT1G31950/AT3G25820/AT5G36150/AT5G48110/AT1G61120/AT1G52400/AT3G20160/AT3G14540/AT1G66020/AT5G48010/AT4G20210/AT1G70080	BETA-OHASE 2/PMK/BHLH93/DXPS1/-/-/LAS1/CCD7/CCD8/CYP71A16/TPS16/PPRD1/-/CYP707A1/CYP716A1/-/TPS27/PEN3/-/GES/BGLU18/-/TPS19/TPS26/THAS1/TPS08/TPS06	27
BP	GO:0010345	suberin biosynthetic process	7/1144	20/23118	3.13175e-05	0.00136352	AT5G22500/AT3G11430/AT3G44540/AT3G44550/AT5G23190/AT5G41040/AT5G58860	FAR1/GPAT5/FAR4/FAR5/CYP86B1/HHT1/CYP86A1	7
BP	GO:0090693	plant organ senescence	19/1144	134/23118	3.38584e-05	0.00143729	AT5G02760/AT1G73220/AT5G24530/AT3G21520/AT4G32940/AT3G04060/AT1G64360/AT3G56400/AT1G17020/AT1G73500/AT1G11190/AT5G44160/AT2G43000/AT4G28530/AT3G52430/AT1G70170/AT5G62165/AT1G77450/AT5G44610	-/OCT1/DMR6/DMP1/GAMMA-VPE/anac046/-/WRKY70/SRG1/MKK9/ENDO1/NUC/JUB1/anac074/PAD4/2MMP/AGL42/NAC032/PCAP2	19
BP	GO:0009415	response to water	39/1144	399/23118	4.3222e-05	0.00179002	AT1G80710/AT5G01820/AT5G38710/AT3G19580/AT1G77120/AT1G67360/AT2G46680/AT5G26340/AT4G05590/AT3G56400/AT1G08920/AT5G58670/AT4G15910/AT1G56600/AT5G37500/AT3G23250/AT2G35930/AT3G50970/AT3G57540/AT5G20830/AT4G02280/AT1G62660/AT2G37040/AT4G23450/AT1G35720/AT2G47190/AT5G17960/AT5G60660/AT1G17950/AT1G43160/AT2G47800/AT1G52400/AT2G38340/AT5G59310/AT5G10230/AT1G48000/AT5G15960/AT3G13672/AT2G01830	DRS1/CIPK14/POX2/AZF2/ADH1/-/ATHB-7/STP13/-/WRKY70/ESL1/PLC1/ATDI21/GOLS2/GORK/MYB15/PUB23/XERO2/REM4.1/SUS1/SUS3/BFRUCT3/PAL1/AIRP1/ANN1/ATMYB2/-/PIP2-4/MYB52/RAP2-6/ABCC4/BGLU18/DREB2E/LTP4/ANNAT7/MYB112/KIN1/-/AHK4	39
BP	GO:0006721	terpenoid metabolic process	23/1144	185/23118	4.57657e-05	0.00185024	AT5G52570/AT1G31910/AT5G65640/AT3G21500/AT3G45130/AT2G44990/AT4G32810/AT5G42590/AT3G29110/AT4G19230/AT5G36110/AT1G31950/AT3G25820/AT5G36150/AT5G48110/AT1G61120/AT1G52400/AT3G20160/AT3G14540/AT1G66020/AT5G48010/AT4G20210/AT1G70080	BETA-OHASE 2/PMK/BHLH93/DXPS1/LAS1/CCD7/CCD8/CYP71A16/TPS16/CYP707A1/CYP716A1/-/TPS27/PEN3/-/GES/BGLU18/-/TPS19/TPS26/THAS1/TPS08/TPS06	23
BP	GO:0080027	response to herbivore	6/1144	15/23118	4.93073e-05	0.00194706	AT1G66700/AT4G15210/AT3G04720/AT3G16400/AT1G61120/AT3G44860	PXMT1/BAM5/HEL/NSP1/GES/FAMT	6
BP	GO:0016311	dephosphorylation	38/1144	388/23118	5.16482e-05	0.00199315	AT5G02760/AT1G17710/AT3G17790/AT1G73010/AT4G03960/AT1G13750/AT3G52820/AT4G32870/AT1G05000/AT3G11430/AT2G38740/AT2G27190/AT2G32960/AT1G47510/AT4G13700/AT2G01880/AT3G46120/AT3G09400/AT5G04120/AT5G24780/AT1G52940/AT1G56360/AT2G18130/AT5G24770/AT2G46880/AT1G67820/AT3G02870/AT4G22590/AT4G36350/AT2G37440/AT1G51420/AT2G01890/AT3G02800/AT3G03520/AT3G54270/AT2G01830/AT5G06090/AT1G35910	-/-/PAP17/PS2/DSP4/PAP1/PAP22/-/-/GPAT5/SGPP/PAP12/DSP2/IP5P11/ATPAP23/PAP7/PAP19/PLL3/IPSP/VSP1/PAP5/PAP6/PAP11/VSP2/PAP14/-/VTC4/TPPG/PAP25/IP5P8/ATSPP1/PAP8/DSP3/NPC3/SPP3A/AHK4/GPAT7/TPPD	38
BP	GO:0009867	jasmonic acid mediated signaling pathway	15/1144	95/23118	6.37144e-05	0.00240416	AT5G05600/AT1G15380/AT1G28480/AT5G63970/AT3G56400/AT5G64810/AT3G55970/AT4G26120/AT3G03450/AT1G19180/AT3G52430/AT1G17380/AT2G38240/AT5G41315/AT3G23240	-/-/GRXC9/RGLG3/WRKY70/WRKY51/JRG21/-/RGL2/TIFY10A/PAD4/TIFY11A/ANS/GL3/ERF1B	15
BP	GO:0001666	response to hypoxia	12/1144	65/23118	7.20161e-05	0.00265833	AT3G43190/AT1G77120/AT5G57510/AT5G39890/AT5G20830/AT2G26560/AT3G52430/AT5G64905/AT5G57090/AT5G25250/AT2G16060/AT4G31970	SUS4/ADH1/-/PCO2/SUS1/PLP2/PAD4/PEP3/PIN2/FLOT1/AHB1/CYP82C2	12
BP	GO:0006749	glutathione metabolic process	11/1144	57/23118	9.40653e-05	0.00336589	AT1G17180/AT5G26220/AT1G69930/AT1G69920/AT1G27140/AT1G17190/AT1G74590/AT2G29460/AT3G43800/AT4G29210/AT1G53680	GSTU25/GGCT2;1/GSTU11/GSTU12/GSTU14/GSTU26/GSTU10/GSTU4/GSTU27/GGT3/GSTU28	11
BP	GO:0006817	phosphate ion transport	9/1144	39/23118	9.51488e-05	0.00336589	AT1G20860/AT2G32830/AT1G76430/AT2G38940/AT3G52190/AT5G09470/AT1G69480/AT3G23430/AT3G54700	PHT1;8/PHT1-5/PHT1-9/PHT1-4/PHF1/PUMP6/PHO1-H10/PHO1/PHT1-7	9
BP	GO:0016999	antibiotic metabolic process	27/1144	249/23118	0.000115926	0.00390952	AT1G18870/AT1G77120/AT5G24530/AT1G73805/AT3G49120/AT2G37130/AT4G37520/AT5G15180/AT1G68850/AT2G35380/AT2G37040/AT4G22110/AT4G23450/AT4G39030/AT3G52430/AT3G32980/AT5G10300/AT5G42250/AT2G44450/AT2G18450/AT1G53310/AT4G18360/AT1G64060/AT3G14940/AT2G38390/AT5G64120/AT1G44970	ICS2/ADH1/DMR6/SARD1/PER34/PER21/PER50/PER56/PER11/PER20/PAL1/-/AIRP1/DTX47/PAD4/PER32/HNL/-/BGLU15/SDH1-2/PPC1/GLO5/RBOHF/PPC3/PER23/PER71/PER9	27
BP	GO:0071395	cellular response to jasmonic acid stimulus	15/1144	100/23118	0.000116118	0.00390952	AT5G05600/AT1G15380/AT1G28480/AT5G63970/AT3G56400/AT5G64810/AT3G55970/AT4G26120/AT3G03450/AT1G19180/AT3G52430/AT1G17380/AT2G38240/AT5G41315/AT3G23240	-/-/GRXC9/RGLG3/WRKY70/WRKY51/JRG21/-/RGL2/TIFY10A/PAD4/TIFY11A/ANS/GL3/ERF1B	15
BP	GO:2000022	regulation of jasmonic acid mediated signaling pathway	9/1144	40/23118	0.000117424	0.00390952	AT5G05600/AT1G15380/AT3G56400/AT3G55970/AT4G26120/AT1G19180/AT3G52430/AT1G17380/AT2G38240	-/-/WRKY70/JRG21/-/TIFY10A/PAD4/TIFY11A/ANS	9
BP	GO:0008299	isoprenoid biosynthetic process	23/1144	200/23118	0.000151936	0.00496129	AT5G52570/AT1G31910/AT5G65640/AT3G21500/AT3G14510/AT5G58784/AT3G45130/AT2G44990/AT4G32810/AT3G29110/AT1G72590/AT2G23400/AT1G31950/AT3G25820/AT5G36150/AT5G48110/AT1G61120/AT3G20160/AT3G14540/AT1G66020/AT5G48010/AT4G20210/AT1G70080	BETA-OHASE 2/PMK/BHLH93/DXPS1/-/-/LAS1/CCD7/CCD8/TPS16/PPRD1/-/-/TPS27/PEN3/-/GES/-/TPS19/TPS26/THAS1/TPS08/TPS06	23
BP	GO:0055062	phosphate ion homeostasis	6/1144	18/23118	0.000160888	0.00505902	AT3G17790/AT3G47420/AT3G02040/AT1G30560/AT5G04340/AT3G51860	PAP17/ATPS3/GDPD1/-/ZAT6/CAX3	6
BP	GO:0072506	trivalent inorganic anion homeostasis	6/1144	18/23118	0.000160888	0.00505902	AT3G17790/AT3G47420/AT3G02040/AT1G30560/AT5G04340/AT3G51860	PAP17/ATPS3/GDPD1/-/ZAT6/CAX3	6
BP	GO:0010015	root morphogenesis	28/1144	268/23118	0.000165166	0.00509914	AT1G70940/AT5G56320/AT5G56540/AT4G26270/AT2G47000/AT2G04025/AT2G17500/AT2G24260/AT1G68765/AT4G33880/AT2G04160/AT4G15290/AT5G57620/AT5G13080/AT5G60660/AT3G30260/AT4G34600/AT2G30340/AT5G44610/AT4G20140/AT1G74500/AT5G58010/AT1G12950/AT1G01380/AT2G01830/AT1G13620/AT1G66470/AT5G51060	PIN3/ATEXPA14/AGP14/PFK3/ABCB4/RGF3/PILS5/BHLH66/IDA/BHLH85/AIR3/CSLB5/MYB36/WRKY75/PIP2-4/AGL79/CIF2/LBD13/PCAP2/GSO1/PRE3/BHLH82/DTX31/ETC1/AHK4/RGF2/BHLH83/RBOHC	28
BP	GO:0009404	toxin metabolic process	12/1144	71/23118	0.000174218	0.00528253	AT1G17180/AT1G69930/AT1G69920/AT1G27140/AT1G17190/AT1G73500/AT1G74590/AT2G29460/AT2G43000/AT3G52430/AT3G43800/AT1G53680	GSTU25/GSTU11/GSTU12/GSTU14/GSTU26/MKK9/GSTU10/GSTU4/JUB1/PAD4/GSTU27/GSTU28	12
BP	GO:0010150	leaf senescence	17/1144	128/23118	0.000194774	0.00580221	AT5G02760/AT1G73220/AT5G24530/AT4G32940/AT3G04060/AT1G64360/AT3G56400/AT1G17020/AT1G73500/AT1G11190/AT5G44160/AT2G43000/AT3G52430/AT1G70170/AT5G62165/AT1G77450/AT5G44610	-/OCT1/DMR6/GAMMA-VPE/anac046/-/WRKY70/SRG1/MKK9/ENDO1/NUC/JUB1/PAD4/2MMP/AGL42/NAC032/PCAP2	17
BP	GO:0098869	cellular oxidant detoxification	21/1144	178/23118	0.00020274	0.00593538	AT3G17790/AT3G49580/AT5G24660/AT3G49570/AT3G49120/AT2G37130/AT1G67600/AT4G37520/AT5G15180/AT1G68850/AT2G35380/AT1G35720/AT3G32980/AT1G19230/AT5G47910/AT2G48150/AT1G64060/AT2G38390/AT5G64120/AT1G44970/AT5G51060	PAP17/LSU1/LSU2/LSU3/PER34/PER21/-/PER50/PER56/PER11/PER20/ANN1/PER32/RBOHE/RBOHD/GPX4/RBOHF/PER23/PER71/PER9/RBOHC	21
BP	GO:0055083	monovalent inorganic anion homeostasis	6/1144	20/23118	0.000308477	0.00872991	AT3G17790/AT3G47420/AT3G02040/AT1G30560/AT5G04340/AT3G51860	PAP17/ATPS3/GDPD1/-/ZAT6/CAX3	6
BP	GO:0072505	divalent inorganic anion homeostasis	6/1144	20/23118	0.000308477	0.00872991	AT3G17790/AT3G47420/AT3G02040/AT1G30560/AT5G04340/AT3G51860	PAP17/ATPS3/GDPD1/-/ZAT6/CAX3	6
BP	GO:0009873	ethylene-activated signaling pathway	22/1144	199/23118	0.000365879	0.0100639	AT1G44830/AT1G64380/AT3G20840/AT3G56400/AT2G47520/AT2G44940/AT4G17490/AT1G73500/AT4G17500/AT5G47230/AT3G52430/AT1G43160/AT3G60490/AT1G62300/AT1G71520/AT2G31230/AT1G28370/AT3G50260/AT1G64060/AT5G61600/AT3G23240/AT5G10720	ERF014/ERF061/PLT1/WRKY70/ERF071/ERF034/ERF6/MKK9/ERF1A/ERF5/PAD4/RAP2-6/ERF035/WRKY6/ERF020/ERF15/ERF11/ERF011/RBOHF/ERF104/ERF1B/AHK5	22
BP	GO:0016114	terpenoid biosynthetic process	19/1144	160/23118	0.000367468	0.0100639	AT5G52570/AT1G31910/AT5G65640/AT3G21500/AT3G45130/AT2G44990/AT4G32810/AT3G29110/AT1G31950/AT3G25820/AT5G36150/AT5G48110/AT1G61120/AT3G20160/AT3G14540/AT1G66020/AT5G48010/AT4G20210/AT1G70080	BETA-OHASE 2/PMK/BHLH93/DXPS1/LAS1/CCD7/CCD8/TPS16/-/TPS27/PEN3/-/GES/-/TPS19/TPS26/THAS1/TPS08/TPS06	19
BP	GO:0000160	phosphorelay signal transduction system	26/1144	256/23118	0.000431209	0.0116221	AT1G44830/AT1G64380/AT3G20840/AT3G56400/AT2G47520/AT2G44940/AT4G17490/AT1G73500/AT3G21510/AT4G17500/AT5G47230/AT3G52430/AT2G40670/AT1G43160/AT3G60490/AT1G62300/AT1G71520/AT2G31230/AT1G28370/AT3G50260/AT2G41310/AT1G64060/AT5G61600/AT3G23240/AT2G01830/AT5G10720	ERF014/ERF061/PLT1/WRKY70/ERF071/ERF034/ERF6/MKK9/AHP1/ERF1A/ERF5/PAD4/ARR16/RAP2-6/ERF035/WRKY6/ERF020/ERF15/ERF11/ERF011/ARR8/RBOHF/ERF104/ERF1B/AHK4/AHK5	26
BP	GO:1901616	organic hydroxy compound catabolic process	8/1144	38/23118	0.000454858	0.0119152	AT1G14520/AT5G24530/AT1G47510/AT4G26260/AT2G37040/AT1G72590/AT3G02870/AT4G19230	MIOX1/DMR6/IP5P11/MIOX4/PAL1/PPRD1/VTC4/CYP707A1	8
BP	GO:0017001	antibiotic catabolic process	15/1144	113/23118	0.000456119	0.0119152	AT1G77120/AT5G24530/AT3G49120/AT2G37130/AT4G37520/AT5G15180/AT1G68850/AT2G35380/AT2G37040/AT4G22110/AT3G32980/AT5G42250/AT2G38390/AT5G64120/AT1G44970	ADH1/DMR6/PER34/PER21/PER50/PER56/PER11/PER20/PAL1/-/PER32/-/PER23/PER71/PER9	15
BP	GO:0009407	toxin catabolic process	9/1144	49/23118	0.000591529	0.0152184	AT1G17180/AT1G69930/AT1G69920/AT1G27140/AT1G17190/AT1G74590/AT2G29460/AT3G43800/AT1G53680	GSTU25/GSTU11/GSTU12/GSTU14/GSTU26/GSTU10/GSTU4/GSTU27/GSTU28	9
BP	GO:1901698	response to nitrogen compound	37/1144	424/23118	0.000630063	0.0159679	AT2G21210/AT1G64380/AT1G08650/AT5G59820/AT1G49900/AT3G19580/AT1G77120/AT5G04340/AT5G27420/AT3G56400/AT1G61340/AT2G14210/AT5G25910/AT5G11210/AT2G33580/AT3G23250/AT4G17490/AT2G29060/AT2G35930/AT4G17500/AT5G47230/AT4G26120/AT4G13890/AT3G04530/AT3G46080/AT5G17960/AT1G62300/AT1G71520/AT2G31230/AT3G27170/AT3G50260/AT2G35000/AT5G46050/AT5G10720/AT5G51060/AT5G48400/AT3G46090	-/ERF061/PPCK1/ZAT12/-/AZF2/ADH1/ZAT6/ATL31/WRKY70/-/ANR1/AtRLP52/GLR2.5/LYK5/MYB15/ERF6/SCL33/PUB23/ERF1A/ERF5/-/SHM5/PPCK2/ZAT8/-/WRKY6/ERF020/ERF15/CLC-B/ERF011/ATL9/NPF5.2/AHK5/RBOHC/GLR1.2/ZAT7	37
BP	GO:0016143	S-glycoside metabolic process	18/1144	155/23118	0.000677423	0.0164324	AT3G44320/AT1G62570/AT2G44460/AT3G28740/AT3G16390/AT4G37400/AT1G12160/AT2G25160/AT2G30840/AT2G44450/AT1G76790/AT3G16400/AT1G04770/AT5G48850/AT1G52400/AT1G47600/AT4G37410/AT4G31970	NIT3/FMOGS-OX4/BGLU28/CYP81D11/NSP3/CYP81F3/-/CYP82F1/-/BGLU15/IGMT5/NSP1/-/SDI1/BGLU18/TGG4/CYP81F4/CYP82C2	18
BP	GO:0019757	glycosinolate metabolic process	18/1144	155/23118	0.000677423	0.0164324	AT3G44320/AT1G62570/AT2G44460/AT3G28740/AT3G16390/AT4G37400/AT1G12160/AT2G25160/AT2G30840/AT2G44450/AT1G76790/AT3G16400/AT1G04770/AT5G48850/AT1G52400/AT1G47600/AT4G37410/AT4G31970	NIT3/FMOGS-OX4/BGLU28/CYP81D11/NSP3/CYP81F3/-/CYP82F1/-/BGLU15/IGMT5/NSP1/-/SDI1/BGLU18/TGG4/CYP81F4/CYP82C2	18
BP	GO:0019760	glucosinolate metabolic process	18/1144	155/23118	0.000677423	0.0164324	AT3G44320/AT1G62570/AT2G44460/AT3G28740/AT3G16390/AT4G37400/AT1G12160/AT2G25160/AT2G30840/AT2G44450/AT1G76790/AT3G16400/AT1G04770/AT5G48850/AT1G52400/AT1G47600/AT4G37410/AT4G31970	NIT3/FMOGS-OX4/BGLU28/CYP81D11/NSP3/CYP81F3/-/CYP82F1/-/BGLU15/IGMT5/NSP1/-/SDI1/BGLU18/TGG4/CYP81F4/CYP82C2	18
BP	GO:0071695	anatomical structure maturation	21/1144	196/23118	0.000743892	0.0177906	AT1G70940/AT4G37770/AT4G08040/AT5G56540/AT2G47000/AT5G13200/AT1G01480/AT4G02280/AT2G24260/AT3G03450/AT4G33880/AT4G15290/AT4G19230/AT5G60660/AT3G63210/AT5G44610/AT5G58010/AT4G26200/AT1G12950/AT1G01380/AT1G66470	PIN3/ACS8/ACS11/AGP14/ABCB4/-/ACS2/SUS3/BHLH66/RGL2/BHLH85/CSLB5/CYP707A1/PIP2-4/MARD1/PCAP2/BHLH82/ACS7/DTX31/ETC1/BHLH83	21
BP	GO:0017000	antibiotic biosynthetic process	7/1144	32/23118	0.000807819	0.0190511	AT1G18870/AT1G73805/AT4G23450/AT4G39030/AT3G52430/AT4G18360/AT1G64060	ICS2/SARD1/AIRP1/DTX47/PAD4/GLO5/RBOHF	7
BP	GO:0015698	inorganic anion transport	17/1144	145/23118	0.000846829	0.0196975	AT1G20860/AT2G32830/AT1G76430/AT2G38940/AT3G12520/AT3G52190/AT1G22150/AT5G09470/AT1G69480/AT3G23430/AT3G54700/AT3G27170/AT1G29290/AT3G15990/AT3G45710/AT1G18880/AT2G01830	PHT1;8/PHT1-5/PHT1-9/PHT1-4/SULTR4;2/PHF1/SULTR1;3/PUMP6/PHO1-H10/PHO1/PHT1-7/CLC-B/CEP14/SULTR3;4/NPF2.5/NPF2.9/AHK4	17
BP	GO:0019751	polyol metabolic process	11/1144	73/23118	0.000881614	0.0197797	AT1G14520/AT4G33770/AT3G02040/AT5G43300/AT1G47510/AT5G41080/AT4G26260/AT1G74210/AT3G02870/AT5G58730/AT2G38010	MIOX1/ITPK2/GDPD1/GDPD3/IP5P11/GDPD2/MIOX4/GDPD5/VTC4/-/-	11
BP	GO:0009812	flavonoid metabolic process	13/1144	96/23118	0.000884033	0.0197797	AT5G24530/AT5G05600/AT2G02990/AT5G13930/AT1G70000/AT3G55970/AT2G43000/AT5G63590/AT2G38240/AT2G44450/AT2G47460/AT3G45070/AT5G41315	DMR6/-/RNS1/CHS/-/JRG21/JUB1/FLS3/ANS/BGLU15/MYB12/-/GL3	13
BP	GO:0044242	cellular lipid catabolic process	14/1144	108/23118	0.000885309	0.0197797	AT3G03530/AT3G05630/AT3G02040/AT5G43300/AT5G65640/AT4G18550/AT5G41080/AT2G44990/AT4G32810/AT5G49900/AT1G72590/AT4G19230/AT3G03520/AT2G38010	NPC4/PLPZETA2/GDPD1/GDPD3/BHLH93/-/GDPD2/CCD7/CCD8/-/PPRD1/CYP707A1/NPC3/-	14
BP	GO:0098660	inorganic ion transmembrane transport	41/1144	496/23118	0.000968199	0.0213507	AT5G13400/AT4G02050/AT1G76430/AT3G47950/AT3G23870/AT1G64200/AT5G26340/AT4G05590/AT3G12520/AT5G27350/AT1G22150/AT1G08920/AT5G11210/AT4G27860/AT5G58670/AT1G79520/AT5G37500/AT5G24290/AT3G22910/AT5G09470/AT1G69480/AT3G51860/AT1G35720/AT3G23430/AT3G05155/AT5G62160/AT3G47220/AT3G20460/AT4G13420/AT3G27170/AT1G72120/AT2G24610/AT3G15990/AT3G60330/AT4G32650/AT5G46050/AT3G45710/AT3G05400/AT4G13800/AT2G38100…	NPF6.1/STP7/PHT1-9/AHA4/-/VHA-E3/STP13/-/SULTR4;2/SFP1/SULTR1;3/ESL1/GLR2.5/-/PLC1/-/GORK/MEB2/ACA13/PUMP6/PHO1-H10/CAX3/ANN1/PHO1/-/ZIP12/PLC9/-/POT5/CLC-B/NPF5.14/ATCNGC14/SULTR3;4/AHA7/KAT3/NPF5.2/NPF2.5/SUGTL5/-/-/GLR1.2	41
BP	GO:0009835	fruit ripening	4/1144	10/23118	0.000985169	0.0214464	AT4G37770/AT4G08040/AT1G01480/AT4G26200	ACS8/ACS11/ACS2/ACS7	4
BP	GO:1901657	glycosyl compound metabolic process	25/1144	258/23118	0.00108643	0.0233514	AT5G63310/AT3G53900/AT3G44320/AT1G62570/AT2G44460/AT4G28940/AT3G28740/AT3G16390/AT3G27190/AT4G37400/AT1G12160/AT2G25160/AT5G49900/AT5G10300/AT2G30840/AT2G44450/AT1G76790/AT3G16400/AT1G04770/AT5G48850/AT1G52400/AT1G47600/AT4G37410/AT2G01830/AT4G31970	NDPK2/UPP/NIT3/FMOGS-OX4/BGLU28/-/CYP81D11/NSP3/UKL2/CYP81F3/-/CYP82F1/-/HNL/-/BGLU15/IGMT5/NSP1/-/SDI1/BGLU18/TGG4/CYP81F4/AHK4/CYP82C2	25
BP	GO:2000280	regulation of root development	12/1144	87/23118	0.00116901	0.0248122	AT5G04340/AT2G04025/AT2G47520/AT1G09560/AT5G57620/AT1G34670/AT4G34600/AT1G66700/AT1G29290/AT4G20140/AT4G25250/AT1G13620	ZAT6/RGF3/ERF071/GLP4/MYB36/AtMYB93/CIF2/PXMT1/CEP14/GSO1/PMEI4/RGF2	12
BP	GO:0009813	flavonoid biosynthetic process	11/1144	77/23118	0.00138326	0.0287052	AT5G24530/AT5G05600/AT2G02990/AT5G13930/AT1G70000/AT3G55970/AT2G43000/AT5G63590/AT2G38240/AT2G47460/AT5G41315	DMR6/-/RNS1/CHS/-/JRG21/JUB1/FLS3/ANS/MYB12/GL3	11
BP	GO:0044273	sulfur compound catabolic process	9/1144	55/23118	0.00140411	0.0287052	AT3G44320/AT5G26220/AT2G44460/AT3G16390/AT2G44450/AT4G29210/AT3G16400/AT1G52400/AT1G47600	NIT3/GGCT2;1/BGLU28/NSP3/BGLU15/GGT3/NSP1/BGLU18/TGG4	9
BP	GO:0071369	cellular response to ethylene stimulus	22/1144	220/23118	0.00140569	0.0287052	AT1G44830/AT1G64380/AT3G20840/AT3G56400/AT2G47520/AT2G44940/AT4G17490/AT1G73500/AT4G17500/AT5G47230/AT3G52430/AT1G43160/AT3G60490/AT1G62300/AT1G71520/AT2G31230/AT1G28370/AT3G50260/AT1G64060/AT5G61600/AT3G23240/AT5G10720	ERF014/ERF061/PLT1/WRKY70/ERF071/ERF034/ERF6/MKK9/ERF1A/ERF5/PAD4/RAP2-6/ERF035/WRKY6/ERF020/ERF15/ERF11/ERF011/RBOHF/ERF104/ERF1B/AHK5	22
BP	GO:0008272	sulfate transport	5/1144	18/23118	0.00146783	0.0287052	AT3G12520/AT1G22150/AT5G09470/AT3G15990/AT2G01830	SULTR4;2/SULTR1;3/PUMP6/SULTR3;4/AHK4	5
BP	GO:0009061	anaerobic respiration	4/1144	11/23118	0.00148767	0.0287052	AT3G27220/AT1G05575/AT1G33055/AT2G18450	-/-/-/SDH1-2	4
BP	GO:0042218	1-aminocyclopropane-1-carboxylate biosynthetic process	4/1144	11/23118	0.00148767	0.0287052	AT4G37770/AT4G08040/AT1G01480/AT4G26200	ACS8/ACS11/ACS2/ACS7	4
BP	GO:0046503	glycerolipid catabolic process	4/1144	11/23118	0.00148767	0.0287052	AT3G02040/AT5G43300/AT4G18550/AT5G41080	GDPD1/GDPD3/-/GDPD2	4
BP	GO:1900056	negative regulation of leaf senescence	4/1144	11/23118	0.00148767	0.0287052	AT5G02760/AT3G56400/AT2G43000/AT1G70170	-/WRKY70/JUB1/2MMP	4
BP	GO:0006820	anion transport	34/1144	400/23118	0.00159499	0.0304303	AT5G12860/AT5G15240/AT1G20860/AT2G32830/AT4G21120/AT1G76430/AT2G38940/AT4G05590/AT3G12520/AT3G52190/AT5G09220/AT1G22150/AT2G39510/AT1G53470/AT5G09470/AT1G69480/AT1G51340/AT3G30725/AT3G25610/AT3G23430/AT4G39670/AT2G48130/AT3G54700/AT3G27170/AT2G40900/AT1G29290/AT1G79900/AT3G15990/AT4G36640/AT1G01070/AT1G79450/AT3G45710/AT1G18880/AT2G01830	DIT1/AVT1J/PHT1;8/PHT1-5/CAT1/PHT1-9/PHT1-4/-/SULTR4;2/PHF1/AAP2/SULTR1;3/-/MSL4/PUMP6/PHO1-H10/DTX42/GDU6/ALA10/PHO1/-/-/PHT1-7/CLC-B/-/CEP14/BAC2/SULTR3;4/-/-/ALIS5/NPF2.5/NPF2.9/AHK4	34
BP	GO:0006066	alcohol metabolic process	16/1144	144/23118	0.00208598	0.0391547	AT1G14520/AT4G33770/AT3G02040/AT5G43300/AT1G47510/AT5G41080/AT4G26260/AT1G74210/AT5G58784/AT1G72590/AT2G23400/AT3G02870/AT4G19230/AT5G58730/AT1G52400/AT2G38010	MIOX1/ITPK2/GDPD1/GDPD3/IP5P11/GDPD2/MIOX4/GDPD5/-/PPRD1/-/VTC4/CYP707A1/-/BGLU18/-	16
BP	GO:0042546	cell wall biogenesis	24/1144	256/23118	0.00210553	0.0391547	AT3G23730/AT4G14130/AT1G10550/AT2G28110/AT5G60950/AT1G79580/AT4G24000/AT3G44990/AT1G33280/AT2G15390/AT5G41040/AT4G15290/AT1G56550/AT1G17950/AT2G32610/AT4G33330/AT4G12350/AT2G15370/AT1G73410/AT5G67210/AT5G48070/AT1G28470/AT2G32620/AT4G22680	XTH16/XTH15/XTH33/IRX7/COBL5/SMB/CSLG2/XTH31/BRN1/FUT4/HHT1/CSLB5/RGXT3/MYB52/CSLB1/PGSIP3/MYB42/FUT5/ATMYB54/IRX15-L/XTH20/NAC010/CSLB2/MYB85	24
BP	GO:0046164	alcohol catabolic process	6/1144	28/23118	0.00213599	0.0391547	AT1G14520/AT1G47510/AT4G26260/AT1G72590/AT3G02870/AT4G19230	MIOX1/IP5P11/MIOX4/PPRD1/VTC4/CYP707A1	6
BP	GO:0018871	1-aminocyclopropane-1-carboxylate metabolic process	4/1144	12/23118	0.00214451	0.0391547	AT4G37770/AT4G08040/AT1G01480/AT4G26200	ACS8/ACS11/ACS2/ACS7	4
BP	GO:0010053	root epidermal cell differentiation	15/1144	132/23118	0.0022739	0.0409477	AT1G70940/AT5G56540/AT4G26270/AT2G47000/AT2G24260/AT4G33880/AT4G15290/AT5G13080/AT5G60660/AT5G44610/AT5G58010/AT1G12950/AT1G01380/AT1G66470/AT5G51060	PIN3/AGP14/PFK3/ABCB4/BHLH66/BHLH85/CSLB5/WRKY75/PIP2-4/PCAP2/BHLH82/DTX31/ETC1/BHLH83/RBOHC	15
BP	GO:0016145	S-glycoside catabolic process	7/1144	38/23118	0.00233918	0.0409477	AT3G44320/AT2G44460/AT3G16390/AT2G44450/AT3G16400/AT1G52400/AT1G47600	NIT3/BGLU28/NSP3/BGLU15/NSP1/BGLU18/TGG4	7
BP	GO:0019759	glycosinolate catabolic process	7/1144	38/23118	0.00233918	0.0409477	AT3G44320/AT2G44460/AT3G16390/AT2G44450/AT3G16400/AT1G52400/AT1G47600	NIT3/BGLU28/NSP3/BGLU15/NSP1/BGLU18/TGG4	7
BP	GO:0019762	glucosinolate catabolic process	7/1144	38/23118	0.00233918	0.0409477	AT3G44320/AT2G44460/AT3G16390/AT2G44450/AT3G16400/AT1G52400/AT1G47600	NIT3/BGLU28/NSP3/BGLU15/NSP1/BGLU18/TGG4	7
BP	GO:0021700	developmental maturation	21/1144	215/23118	0.00237523	0.040978	AT1G70940/AT4G37770/AT4G08040/AT5G56540/AT2G47000/AT5G13200/AT1G01480/AT4G02280/AT2G24260/AT3G03450/AT4G33880/AT4G15290/AT4G19230/AT5G60660/AT3G63210/AT5G44610/AT5G58010/AT4G26200/AT1G12950/AT1G01380/AT1G66470	PIN3/ACS8/ACS11/AGP14/ABCB4/-/ACS2/SUS3/BHLH66/RGL2/BHLH85/CSLB5/CYP707A1/PIP2-4/MARD1/PCAP2/BHLH82/ACS7/DTX31/ETC1/BHLH83	21
BP	GO:0016051	carbohydrate biosynthetic process	32/1144	379/23118	0.00238918	0.040978	AT1G44830/AT1G14520/AT2G28110/AT5G60950/AT4G10120/AT4G26260/AT2G46740/AT1G55740/AT4G24000/AT3G27190/AT1G05610/AT2G15390/AT5G41040/AT2G43000/AT4G15290/AT3G02870/AT4G22590/AT1G56550/AT5G65690/AT2G30840/AT2G32610/AT4G33330/AT2G15370/AT1G51420/AT1G04770/AT5G48850/AT5G67210/AT5G33290/AT3G54270/AT2G32620/AT5G44480/AT1G35910	ERF014/MIOX1/IRX7/COBL5/SPS4/MIOX4/GULLO5/RFS1/CSLG2/UKL2/APS2/FUT4/HHT1/JUB1/CSLB5/VTC4/TPPG/RGXT3/PCK2/-/CSLB1/PGSIP3/FUT5/ATSPP1/-/SDI1/IRX15-L/XGD1/SPP3A/CSLB2/DUR/TPPD	32
BP	GO:0006722	triterpenoid metabolic process	5/1144	20/23118	0.00244594	0.0410206	AT3G45130/AT5G42590/AT5G36110/AT5G36150/AT5G48010	LAS1/CYP71A16/CYP716A1/PEN3/THAS1	5
BP	GO:0042743	hydrogen peroxide metabolic process	14/1144	120/23118	0.00245506	0.0410206	AT3G49120/AT2G37130/AT4G37520/AT5G15180/AT1G68850/AT2G35380/AT4G23450/AT3G52430/AT3G32980/AT4G18360/AT1G64060/AT2G38390/AT5G64120/AT1G44970	PER34/PER21/PER50/PER56/PER11/PER20/AIRP1/PAD4/PER32/GLO5/RBOHF/PER23/PER71/PER9	14
BP	GO:0034637	cellular carbohydrate biosynthetic process	22/1144	230/23118	0.00246413	0.0410206	AT2G28110/AT5G60950/AT4G10120/AT4G24000/AT3G27190/AT1G05610/AT2G15390/AT5G41040/AT2G43000/AT4G15290/AT3G02870/AT4G22590/AT1G56550/AT2G32610/AT4G33330/AT2G15370/AT1G51420/AT5G67210/AT3G54270/AT2G32620/AT5G44480/AT1G35910	IRX7/COBL5/SPS4/CSLG2/UKL2/APS2/FUT4/HHT1/JUB1/CSLB5/VTC4/TPPG/RGXT3/CSLB1/PGSIP3/FUT5/ATSPP1/IRX15-L/SPP3A/CSLB2/DUR/TPPD	22
BP	GO:0005984	disaccharide metabolic process	10/1144	72/23118	0.00278338	0.0456257	AT3G43190/AT4G10120/AT5G20830/AT4G02280/AT1G62660/AT2G43000/AT4G22590/AT1G51420/AT3G54270/AT1G35910	SUS4/SPS4/SUS1/SUS3/BFRUCT3/JUB1/TPPG/ATSPP1/SPP3A/TPPD	10
BP	GO:0010646	regulation of cell communication	30/1144	352/23118	0.00279451	0.0456257	AT1G70940/AT5G20150/AT2G45130/AT1G23140/AT5G05600/AT1G15380/AT2G47000/AT3G56400/AT2G17500/AT5G37740/AT1G73500/AT3G55970/AT4G26120/AT3G03450/AT1G02520/AT4G23450/AT1G19180/AT3G52430/AT1G17380/AT2G38240/AT5G57090/AT2G32510/AT1G70810/AT1G70800/AT1G52400/AT4G37900/AT1G67030/AT1G01380/AT5G48170/AT5G10720	PIN3/SPX1/SPX3/CAR8/-/-/ABCB4/WRKY70/PILS5/-/MKK9/JRG21/-/RGL2/ABCB11/AIRP1/TIFY10A/PAD4/TIFY11A/ANS/PIN2/MAPKKK17/CAR7/CAR6/BGLU18/GRDP2/ZFP6/ETC1/SNE/AHK5	30
BP	GO:1905622	negative regulation of leaf development	4/1144	13/23118	0.0029771	0.048144	AT5G02760/AT3G56400/AT2G43000/AT1G70170	-/WRKY70/JUB1/2MMP	4
BP	GO:0010315	auxin efflux	5/1144	21/23118	0.00308096	0.0482025	AT1G70940/AT2G47000/AT2G17500/AT1G02520/AT5G57090	PIN3/ABCB4/PILS5/ABCB11/PIN2	5
BP	GO:0009808	lignin metabolic process	10/1144	73/23118	0.00308525	0.0482025	AT2G40370/AT4G37990/AT3G27190/AT2G37040/AT4G34230/AT3G19450/AT1G67980/AT5G64120/AT4G19370/AT1G61820	LAC5/CAD8/UKL2/PAL1/CAD5/CAD4/CCOAMT/PER71/-/BGLU46	10
BP	GO:0042537	benzene-containing compound metabolic process	10/1144	73/23118	0.00308525	0.0482025	AT1G18870/AT1G17180/AT4G34180/AT5G24530/AT1G73805/AT2G37040/AT4G39030/AT3G52430/AT5G10300/AT3G10340	ICS2/GSTU25/CYCLASE1/DMR6/SARD1/PAL1/DTX47/PAD4/HNL/PAL4	10
BP	GO:0071456	cellular response to hypoxia	6/1144	30/23118	0.00309427	0.0482025	AT1G77120/AT5G57510/AT2G26560/AT5G64905/AT5G25250/AT4G31970	ADH1/-/PLP2/PEP3/FLOT1/CYP82C2	6
BP	GO:1901658	glycosyl compound catabolic process	9/1144	62/23118	0.00329142	0.0508076	AT3G44320/AT2G44460/AT3G16390/AT5G49900/AT5G10300/AT2G44450/AT3G16400/AT1G52400/AT1G47600	NIT3/BGLU28/NSP3/-/HNL/BGLU15/NSP1/BGLU18/TGG4	9
BP	GO:0042430	indole-containing compound metabolic process	12/1144	99/23118	0.00354856	0.0542833	AT4G34180/AT3G28740/AT4G37400/AT1G73500/AT2G25160/AT2G43000/AT3G52430/AT3G44300/AT1G76790/AT4G37410/AT4G31970/AT4G35160	CYCLASE1/CYP81D11/CYP81F3/MKK9/CYP82F1/JUB1/PAD4/NIT2/IGMT5/CYP81F4/CYP82C2/ASMT	12
BP	GO:0071236	cellular response to antibiotic	11/1144	88/23118	0.00405098	0.0614158	AT1G44830/AT1G15380/AT1G28480/AT3G56400/AT3G50930/AT3G03450/AT3G52430/AT5G12270/AT5G01900/AT5G03350/AT5G10720	ERF014/-/GRXC9/WRKY70/HSR4/RGL2/PAD4/-/WRKY62/LLP/AHK5	11
BP	GO:0034285	response to disaccharide	10/1144	76/23118	0.00414985	0.0620206	AT5G04140/AT1G77120/AT1G19200/AT4G17670/AT5G20830/AT4G39795/AT3G52430/AT3G22550/AT3G63210/AT2G01830	GLU1/ADH1/FLZ12/FLZ2/SUS1/FLZ7/PAD4/FLZ8/MARD1/AHK4	10
BP	GO:1901136	carbohydrate derivative catabolic process	12/1144	101/23118	0.00418313	0.0620206	AT3G44320/AT4G19810/AT3G47540/AT2G44460/AT3G12500/AT3G16390/AT5G49900/AT5G10300/AT2G44450/AT3G16400/AT1G52400/AT1G47600	NIT3/ChiC/-/BGLU28/CHI-B/NSP3/-/HNL/BGLU15/NSP1/BGLU18/TGG4	12
BP	GO:0006855	drug transmembrane transport	13/1144	114/23118	0.00420045	0.0620206	AT4G21120/AT2G39510/AT4G15230/AT5G09470/AT1G51340/AT4G39030/AT3G26590/AT1G11670/AT5G60660/AT1G79900/AT2G47800/AT2G04100/AT1G12950	CAT1/-/ABCG30/PUMP6/DTX42/DTX47/DTX29/DTX36/PIP2-4/BAC2/ABCC4/DTX6/DTX31	13
BP	GO:0009625	response to insect	6/1144	32/23118	0.00434126	0.0621722	AT3G56400/AT5G65040/AT5G24770/AT3G52430/AT1G52400/AT1G73260	WRKY70/IRM1/VSP2/PAD4/BGLU18/KTI1	6
BP	GO:0036294	cellular response to decreased oxygen levels	6/1144	32/23118	0.00434126	0.0621722	AT1G77120/AT5G57510/AT2G26560/AT5G64905/AT5G25250/AT4G31970	ADH1/-/PLP2/PEP3/FLOT1/CYP82C2	6
BP	GO:0071453	cellular response to oxygen levels	6/1144	32/23118	0.00434126	0.0621722	AT1G77120/AT5G57510/AT2G26560/AT5G64905/AT5G25250/AT4G31970	ADH1/-/PLP2/PEP3/FLOT1/CYP82C2	6
BP	GO:0098655	cation transmembrane transport	37/1144	474/23118	0.00435718	0.0621722	AT5G13400/AT1G73220/AT4G02050/AT4G21120/AT3G47950/AT3G23870/AT1G64200/AT5G26340/AT4G05590/AT5G27350/AT1G08920/AT5G11210/AT4G27860/AT5G58670/AT1G79520/AT5G37500/AT5G24290/AT3G22910/AT3G51860/AT1G35720/AT3G05155/AT5G62160/AT3G47220/AT3G20460/AT4G13420/AT5G47450/AT3G27170/AT1G72120/AT2G24610/AT1G79900/AT3G60330/AT4G32650/AT5G46050/AT3G05400/AT4G13800/AT2G38100/AT5G48400	NPF6.1/OCT1/STP7/CAT1/AHA4/-/VHA-E3/STP13/-/SFP1/ESL1/GLR2.5/-/PLC1/-/GORK/MEB2/ACA13/CAX3/ANN1/-/ZIP12/PLC9/-/POT5/TIP2-3/CLC-B/NPF5.14/ATCNGC14/BAC2/AHA7/KAT3/NPF5.2/SUGTL5/-/-/GLR1.2	37
BP	GO:0098661	inorganic anion transmembrane transport	9/1144	65/23118	0.0045466	0.0643344	AT1G76430/AT3G12520/AT1G22150/AT5G09470/AT1G69480/AT3G23430/AT3G27170/AT3G15990/AT3G45710	PHT1-9/SULTR4;2/SULTR1;3/PUMP6/PHO1-H10/PHO1/CLC-B/SULTR3;4/NPF2.5	9
BP	GO:0042447	hormone catabolic process	5/1144	23/23118	0.00469324	0.0647896	AT5G24530/AT5G65640/AT2G37040/AT4G29740/AT1G14120	DMR6/BHLH93/PAL1/CKX4/-	5
BP	GO:0051761	sesquiterpene metabolic process	5/1144	23/23118	0.00469324	0.0647896	AT1G31950/AT3G14540/AT1G66020/AT4G20210/AT1G70080	-/TPS19/TPS26/TPS08/TPS06	5
BP	GO:0051762	sesquiterpene biosynthetic process	5/1144	23/23118	0.00469324	0.0647896	AT1G31950/AT3G14540/AT1G66020/AT4G20210/AT1G70080	-/TPS19/TPS26/TPS08/TPS06	5
BP	GO:0005985	sucrose metabolic process	7/1144	43/23118	0.00482081	0.066014	AT3G43190/AT4G10120/AT5G20830/AT4G02280/AT1G62660/AT1G51420/AT3G54270	SUS4/SPS4/SUS1/SUS3/BFRUCT3/ATSPP1/SPP3A	7
BP	GO:0009958	positive gravitropism	6/1144	33/23118	0.00508776	0.0691122	AT1G70940/AT3G30350/AT2G16005/AT5G57090/AT2G23050/AT2G14820	PIN3/RGF4/ROSY1/PIN2/NPY4/NPY2	6
BP	GO:1902358	sulfate transmembrane transport	4/1144	15/23118	0.00525103	0.0707638	AT3G12520/AT1G22150/AT5G09470/AT3G15990	SULTR4;2/SULTR1;3/PUMP6/SULTR3;4	4
BP	GO:0080167	response to karrikin	14/1144	133/23118	0.0062248	0.0826851	AT2G16660/AT5G05600/AT3G44720/AT2G44460/AT1G70000/AT2G37040/AT3G19450/AT3G02870/AT5G63590/AT3G43800/AT4G24110/AT3G13790/AT2G23910/AT3G55720	-/-/ADT4/BGLU28/-/PAL1/CAD4/VTC4/FLS3/GSTU27/-/CWINV1/-/-	14
BP	GO:0042214	terpene metabolic process	7/1144	45/23118	0.00623303	0.0826851	AT2G44990/AT4G32810/AT1G31950/AT3G14540/AT1G66020/AT4G20210/AT1G70080	CCD7/CCD8/-/TPS19/TPS26/TPS08/TPS06	7
BP	GO:0042742	defense response to bacterium	34/1144	438/23118	0.00661832	0.0871156	AT4G03960/AT2G45220/AT5G24530/AT5G24660/AT3G45860/AT1G73805/AT3G49120/AT5G27420/AT5G63970/AT3G56400/AT5G64810/AT4G23670/AT1G70690/AT2G39050/AT1G68765/AT4G26120/AT4G23130/AT4G39030/AT1G19180/AT3G52430/AT5G01550/AT1G51890/AT5G65210/AT1G10300/AT1G66700/AT4G23160/AT3G04720/AT5G01900/AT3G50260/AT2G05940/AT4G18360/AT1G73260/AT5G46050/AT2G01830	DSP4/PME17/DMR6/LSU2/CRK4/SARD1/PER34/ATL31/RGLG3/WRKY70/WRKY51/-/CRRSP2/EULS3/IDA/-/CRK5/DTX47/TIFY10A/PAD4/LECRKA4.2/-/TGA1/-/PXMT1/CRK8/HEL/WRKY62/ERF011/RIPK/GLO5/KTI1/NPF5.2/AHK4	34
BP	GO:0008300	isoprenoid catabolic process	5/1144	25/23118	0.0068281	0.0888729	AT5G65640/AT2G44990/AT4G32810/AT1G72590/AT4G19230	BHLH93/CCD7/CCD8/PPRD1/CYP707A1	5
BP	GO:0046351	disaccharide biosynthetic process	6/1144	35/23118	0.00685651	0.0888729	AT4G10120/AT2G43000/AT4G22590/AT1G51420/AT3G54270/AT1G35910	SPS4/JUB1/TPPG/ATSPP1/SPP3A/TPPD	6
BP	GO:0009834	plant-type secondary cell wall biogenesis	10/1144	82/23118	0.00713462	0.0917772	AT2G28110/AT1G79580/AT1G33280/AT1G17950/AT4G33330/AT4G12350/AT1G73410/AT5G67210/AT1G28470/AT4G22680	IRX7/SMB/BRN1/MYB52/PGSIP3/MYB42/ATMYB54/IRX15-L/NAC010/MYB85	10
BP	GO:0042343	indole glucosinolate metabolic process	6/1144	36/23118	0.00789057	0.100738	AT3G28740/AT4G37400/AT2G25160/AT1G76790/AT4G37410/AT4G31970	CYP81D11/CYP81F3/CYP82F1/IGMT5/CYP81F4/CYP82C2	6
BP	GO:1901617	organic hydroxy compound biosynthetic process	20/1144	224/23118	0.00803007	0.101754	AT3G30180/AT1G18870/AT1G31910/AT1G73805/AT5G58784/AT4G15393/AT4G39030/AT3G52430/AT1G72590/AT2G23400/AT3G02870/AT5G63590/AT5G58730/AT5G36110/AT2G34500/AT2G47460/AT2G42850/AT4G15396/AT5G24140/AT2G38010	CYP85A2/ICS2/PMK/SARD1/-/CYP702A5/DTX47/PAD4/PPRD1/-/VTC4/FLS3/-/CYP716A1/CYP710A1/MYB12/CYP718/CYP702A6/SQP2/-	20
BP	GO:0009832	plant-type cell wall biogenesis	17/1144	180/23118	0.00815462	0.101813	AT2G28110/AT5G60950/AT1G79580/AT4G24000/AT1G33280/AT5G41040/AT4G15290/AT1G56550/AT1G17950/AT2G32610/AT4G33330/AT4G12350/AT1G73410/AT5G67210/AT1G28470/AT2G32620/AT4G22680	IRX7/COBL5/SMB/CSLG2/BRN1/HHT1/CSLB5/RGXT3/MYB52/CSLB1/PGSIP3/MYB42/ATMYB54/IRX15-L/NAC010/CSLB2/MYB85	17
BP	GO:0044272	sulfur compound biosynthetic process	17/1144	180/23118	0.00815462	0.101813	AT5G01220/AT1G62570/AT2G26400/AT3G22740/AT3G13110/AT1G73500/AT1G12160/AT2G43000/AT3G52430/AT4G21990/AT2G30840/AT1G55920/AT1G76790/AT4G29210/AT1G04770/AT5G48850/AT4G04610	SQD2/FMOGS-OX4/ARD/HMT3/SAT3/MKK9/-/JUB1/PAD4/APR3/-/SAT1/IGMT5/GGT3/-/SDI1/APR1	17
BP	GO:0012501	programmed cell death	16/1144	166/23118	0.00836121	0.103315	AT3G06730/AT4G34180/AT3G45860/AT1G73805/AT3G12500/AT1G14780/AT3G50930/AT4G23130/AT2G26560/AT4G28530/AT3G52430/AT5G47910/AT5G12270/AT5G50260/AT1G64060/AT1G73260	CITRX/CYCLASE1/CRK4/SARD1/CHI-B/-/HSR4/CRK5/PLP2/anac074/PAD4/RBOHD/-/CEP1/RBOHF/KTI1	16
BP	GO:1901607	alpha-amino acid biosynthetic process	19/1144	210/23118	0.00839665	0.103315	AT4G37770/AT5G04140/AT5G65010/AT4G08040/AT5G22630/AT3G44720/AT1G01480/AT2G26400/AT5G04120/AT3G22740/AT3G13110/AT4G13890/AT2G43000/AT4G21990/AT1G55920/AT4G29210/AT1G79900/AT4G26200/AT4G04610	ACS8/GLU1/ASN2/ACS11/ADT5/ADT4/ACS2/ARD/IPSP/HMT3/SAT3/SHM5/JUB1/APR3/SAT1/GGT3/BAC2/ACS7/APR1	19
BP	GO:0048764	trichoblast maturation	12/1144	111/23118	0.00884455	0.107272	AT1G70940/AT5G56540/AT2G47000/AT2G24260/AT4G33880/AT4G15290/AT5G60660/AT5G44610/AT5G58010/AT1G12950/AT1G01380/AT1G66470	PIN3/AGP14/ABCB4/BHLH66/BHLH85/CSLB5/PIP2-4/PCAP2/BHLH82/DTX31/ETC1/BHLH83	12
BP	GO:0048765	root hair cell differentiation	12/1144	111/23118	0.00884455	0.107272	AT1G70940/AT5G56540/AT2G47000/AT2G24260/AT4G33880/AT4G15290/AT5G60660/AT5G44610/AT5G58010/AT1G12950/AT1G01380/AT1G66470	PIN3/AGP14/ABCB4/BHLH66/BHLH85/CSLB5/PIP2-4/PCAP2/BHLH82/DTX31/ETC1/BHLH83	12
BP	GO:0023051	regulation of signaling	28/1144	351/23118	0.00912681	0.10991	AT1G70940/AT1G23140/AT5G05600/AT1G15380/AT2G47000/AT3G56400/AT2G17500/AT5G37740/AT1G73500/AT3G55970/AT4G26120/AT3G03450/AT1G02520/AT4G23450/AT1G19180/AT3G52430/AT1G17380/AT2G38240/AT5G57090/AT2G32510/AT1G70810/AT1G70800/AT1G52400/AT4G37900/AT1G67030/AT1G01380/AT5G48170/AT5G10720	PIN3/CAR8/-/-/ABCB4/WRKY70/PILS5/-/MKK9/JRG21/-/RGL2/ABCB11/AIRP1/TIFY10A/PAD4/TIFY11A/ANS/PIN2/MAPKKK17/CAR7/CAR6/BGLU18/GRDP2/ZFP6/ETC1/SNE/AHK5	28
BP	GO:0048469	cell maturation	12/1144	112/23118	0.00947336	0.11328	AT1G70940/AT5G56540/AT2G47000/AT2G24260/AT4G33880/AT4G15290/AT5G60660/AT5G44610/AT5G58010/AT1G12950/AT1G01380/AT1G66470	PIN3/AGP14/ABCB4/BHLH66/BHLH85/CSLB5/PIP2-4/PCAP2/BHLH82/DTX31/ETC1/BHLH83	12
BP	GO:2000652	regulation of secondary cell wall biogenesis	5/1144	27/23118	0.00956222	0.113543	AT1G17950/AT4G12350/AT1G73410/AT1G28470/AT4G22680	MYB52/MYB42/ATMYB54/NAC010/MYB85	5
BP	GO:0071446	cellular response to salicylic acid stimulus	9/1144	73/23118	0.00973225	0.114759	AT1G44830/AT1G15380/AT1G28480/AT3G56400/AT3G50930/AT3G03450/AT3G52430/AT5G01900/AT5G03350	ERF014/-/GRXC9/WRKY70/HSR4/RGL2/PAD4/WRKY62/LLP	9
BP	GO:0009733	response to auxin	33/1144	434/23118	0.0098942	0.115727	AT1G70940/AT5G63310/AT2G21210/AT3G15540/AT4G32280/AT2G37030/AT3G53250/AT2G21200/AT3G05630/AT3G20840/AT2G47000/AT5G13930/AT1G47510/AT1G56010/AT2G17500/AT3G23250/AT1G70000/AT4G32810/AT4G33880/AT1G02520/AT2G04160/AT1G34670/AT1G28130/AT5G63590/AT5G20810/AT2G47460/AT5G57090/AT5G54490/AT3G03660/AT5G48070/AT5G37260/AT4G37900/AT5G10990	PIN3/NDPK2/-/IAA19/IAA29/-/-/-/PLPZETA2/PLT1/ABCB4/CHS/IP5P11/NAC021/PILS5/MYB15/-/CCD8/BHLH85/ABCB11/AIR3/AtMYB93/GH3.17/FLS3/-/MYB12/PIN2/PBP1/WOX11/XTH20/RVE2/GRDP2/-	33
BP	GO:0009809	lignin biosynthetic process	7/1144	49/23118	0.0099506	0.115727	AT4G37990/AT3G27190/AT4G34230/AT3G19450/AT1G67980/AT4G19370/AT1G61820	CAD8/UKL2/CAD5/CAD4/CCOAMT/-/BGLU46	7
BP	GO:0015893	drug transport	14/1144	141/23118	0.0102434	0.118321	AT4G21120/AT2G39510/AT4G15230/AT5G09470/AT1G51340/AT4G39030/AT3G26590/AT1G11670/AT5G60660/AT1G79900/AT2G47800/AT2G04100/AT2G16060/AT1G12950	CAT1/-/ABCG30/PUMP6/DTX42/DTX47/DTX29/DTX36/PIP2-4/BAC2/ABCC4/DTX6/AHB1/DTX31	14
BP	GO:0009311	oligosaccharide metabolic process	11/1144	100/23118	0.0105143	0.119951	AT3G43190/AT4G10120/AT1G55740/AT5G20830/AT4G02280/AT1G62660/AT2G43000/AT4G22590/AT1G51420/AT3G54270/AT1G35910	SUS4/SPS4/RFS1/SUS1/SUS3/BFRUCT3/JUB1/TPPG/ATSPP1/SPP3A/TPPD	11
BP	GO:0009744	response to sucrose	9/1144	74/23118	0.0106073	0.119951	AT5G04140/AT1G77120/AT1G19200/AT4G17670/AT5G20830/AT4G39795/AT3G22550/AT3G63210/AT2G01830	GLU1/ADH1/FLZ12/FLZ2/SUS1/FLZ7/FLZ8/MARD1/AHK4	9
BP	GO:0008645	hexose transmembrane transport	7/1144	50/23118	0.0110892	0.119951	AT4G02050/AT5G26340/AT5G27350/AT1G08920/AT3G05155/AT3G20460/AT3G05400	STP7/STP13/SFP1/ESL1/-/-/SUGTL5	7
BP	GO:0015800	acidic amino acid transport	3/1144	10/23118	0.011162	0.119951	AT4G21120/AT5G09220/AT2G39510	CAT1/AAP2/-	3
BP	GO:0035337	fatty-acyl-CoA metabolic process	3/1144	10/23118	0.011162	0.119951	AT5G22500/AT3G44540/AT3G44550	FAR1/FAR4/FAR5	3
BP	GO:0046292	formaldehyde metabolic process	3/1144	10/23118	0.011162	0.119951	AT1G77120/AT4G22110/AT5G42250	ADH1/-/-	3
BP	GO:0046294	formaldehyde catabolic process	3/1144	10/23118	0.011162	0.119951	AT1G77120/AT4G22110/AT5G42250	ADH1/-/-	3
BP	GO:0110095	cellular detoxification of aldehyde	3/1144	10/23118	0.011162	0.119951	AT1G77120/AT4G22110/AT5G42250	ADH1/-/-	3
BP	GO:2000067	regulation of root morphogenesis	3/1144	10/23118	0.011162	0.119951	AT5G57620/AT4G34600/AT4G20140	MYB36/CIF2/GSO1	3
BP	GO:0002213	defense response to insect	5/1144	28/23118	0.0111766	0.119951	AT3G28740/AT5G65040/AT5G24770/AT2G29460/AT3G52430	CYP81D11/IRM1/VSP2/GSTU4/PAD4	5
BP	GO:0019344	cysteine biosynthetic process	5/1144	28/23118	0.0111766	0.119951	AT3G13110/AT4G21990/AT1G55920/AT4G29210/AT4G04610	SAT3/APR3/SAT1/GGT3/APR1	5
BP	GO:0098662	inorganic cation transmembrane transport	33/1144	438/23118	0.0112322	0.119951	AT5G13400/AT4G02050/AT3G47950/AT3G23870/AT1G64200/AT5G26340/AT4G05590/AT5G27350/AT1G08920/AT5G11210/AT4G27860/AT5G58670/AT1G79520/AT5G37500/AT5G24290/AT3G22910/AT3G51860/AT1G35720/AT3G05155/AT5G62160/AT3G47220/AT3G20460/AT4G13420/AT3G27170/AT1G72120/AT2G24610/AT3G60330/AT4G32650/AT5G46050/AT3G05400/AT4G13800/AT2G38100/AT5G48400	NPF6.1/STP7/AHA4/-/VHA-E3/STP13/-/SFP1/ESL1/GLR2.5/-/PLC1/-/GORK/MEB2/ACA13/CAX3/ANN1/-/ZIP12/PLC9/-/POT5/CLC-B/NPF5.14/ATCNGC14/AHA7/KAT3/NPF5.2/SUGTL5/-/-/GLR1.2	33
BP	GO:1900055	regulation of leaf senescence	6/1144	39/23118	0.011661	0.122845	AT5G02760/AT3G04060/AT3G56400/AT2G43000/AT1G70170/AT1G77450	-/anac046/WRKY70/JUB1/2MMP/NAC032	6
BP	GO:0042737	drug catabolic process	22/1144	263/23118	0.0116634	0.122845	AT2G45220/AT5G24530/AT3G49120/AT4G19810/AT3G47540/AT2G37130/AT3G12500/AT4G37520/AT5G15180/AT1G68850/AT2G35380/AT1G68765/AT2G37040/AT3G32980/AT3G10340/AT1G53830/AT5G55590/AT2G38390/AT5G64120/AT5G51490/AT1G44970/AT5G20860	PME17/DMR6/PER34/ChiC/-/PER21/CHI-B/PER50/PER56/PER11/PER20/IDA/PAL1/PER32/PAL4/PME2/QRT1/PER23/PER71/PME59/PER9/-	22
BP	GO:0008219	cell death	18/1144	202/23118	0.0117202	0.122845	AT1G55490/AT3G06730/AT4G34180/AT3G45860/AT1G73805/AT3G12500/AT1G14780/AT3G50930/AT4G23130/AT2G26560/AT4G28530/AT3G52430/AT5G47910/AT5G12270/AT3G50260/AT5G50260/AT1G64060/AT1G73260	CPN60B1/CITRX/CYCLASE1/CRK4/SARD1/CHI-B/-/HSR4/CRK5/PLP2/anac074/PAD4/RBOHD/-/ERF011/CEP1/RBOHF/KTI1	18
BP	GO:0009966	regulation of signal transduction	27/1144	343/23118	0.0121435	0.126328	AT1G70940/AT1G23140/AT5G05600/AT1G15380/AT2G47000/AT3G56400/AT2G17500/AT5G37740/AT1G73500/AT3G55970/AT4G26120/AT3G03450/AT1G02520/AT4G23450/AT1G19180/AT3G52430/AT1G17380/AT2G38240/AT5G57090/AT2G32510/AT1G70810/AT1G70800/AT1G52400/AT4G37900/AT1G67030/AT5G48170/AT5G10720	PIN3/CAR8/-/-/ABCB4/WRKY70/PILS5/-/MKK9/JRG21/-/RGL2/ABCB11/AIRP1/TIFY10A/PAD4/TIFY11A/ANS/PIN2/MAPKKK17/CAR7/CAR6/BGLU18/GRDP2/ZFP6/SNE/AHK5	27
BP	GO:0009696	salicylic acid metabolic process	7/1144	51/23118	0.0123193	0.126328	AT1G18870/AT5G24530/AT1G73805/AT2G37040/AT4G39030/AT3G52430/AT5G10300	ICS2/DMR6/SARD1/PAL1/DTX47/PAD4/HNL	7
BP	GO:0015749	monosaccharide transmembrane transport	7/1144	51/23118	0.0123193	0.126328	AT4G02050/AT5G26340/AT5G27350/AT1G08920/AT3G05155/AT3G20460/AT3G05400	STP7/STP13/SFP1/ESL1/-/-/SUGTL5	7
BP	GO:0006575	cellular modified amino acid metabolic process	13/1144	130/23118	0.0123501	0.126328	AT1G17180/AT5G26220/AT1G69930/AT1G69920/AT1G27140/AT3G22740/AT1G17190/AT1G74590/AT2G29460/AT4G13890/AT3G43800/AT4G29210/AT1G53680	GSTU25/GGCT2;1/GSTU11/GSTU12/GSTU14/HMT3/GSTU26/GSTU10/GSTU4/SHM5/GSTU27/GGT3/GSTU28	13
BP	GO:0048878	chemical homeostasis	33/1144	442/23118	0.0127146	0.127994	AT1G70940/AT3G30180/AT3G17790/AT3G47420/AT3G02040/AT1G30560/AT3G47950/AT5G04340/AT2G40370/AT4G27860/AT2G17500/AT5G58670/AT1G79520/AT5G24290/AT4G15393/AT3G51860/AT5G57620/AT3G47220/AT1G28130/AT5G47910/AT4G34600/AT5G36110/AT5G57090/AT2G42850/AT4G20140/AT2G23630/AT1G52400/AT3G60330/AT1G64060/AT5G54230/AT4G15396/AT2G01830/AT1G14120	PIN3/CYP85A2/PAP17/ATPS3/GDPD1/-/AHA4/ZAT6/LAC5/-/PILS5/PLC1/-/MEB2/CYP702A5/CAX3/MYB36/PLC9/GH3.17/RBOHD/CIF2/CYP716A1/PIN2/CYP718/GSO1/sks16/BGLU18/AHA7/RBOHF/MYB49/CYP702A6/AHK4/-	33
BP	GO:0009697	salicylic acid biosynthetic process	4/1144	19/23118	0.0127391	0.127994	AT1G18870/AT1G73805/AT4G39030/AT3G52430	ICS2/SARD1/DTX47/PAD4	4
BP	GO:0015804	neutral amino acid transport	4/1144	19/23118	0.0127391	0.127994	AT5G09220/AT2G39510/AT2G40900/AT1G01070	AAP2/-/-/-	4
BP	GO:0006012	galactose metabolic process	5/1144	29/23118	0.0129672	0.129519	AT1G60450/AT4G10960/AT1G56600/AT1G60470/AT5G44480	GOLS7/UGE5/GOLS2/GOLS4/DUR	5
BP	GO:0010054	trichoblast differentiation	12/1144	117/23118	0.0131538	0.130614	AT1G70940/AT5G56540/AT2G47000/AT2G24260/AT4G33880/AT4G15290/AT5G60660/AT5G44610/AT5G58010/AT1G12950/AT1G01380/AT1G66470	PIN3/AGP14/ABCB4/BHLH66/BHLH85/CSLB5/PIP2-4/PCAP2/BHLH82/DTX31/ETC1/BHLH83	12
BP	GO:0009749	response to glucose	8/1144	64/23118	0.013304	0.131339	AT5G01820/AT1G19200/AT4G17670/AT5G20830/AT4G39795/AT3G22550/AT3G63210/AT5G57090	CIPK14/FLZ12/FLZ2/SUS1/FLZ7/FLZ8/MARD1/PIN2	8
BP	GO:0080147	root hair cell development	10/1144	91/23118	0.0144281	0.139402	AT1G70940/AT5G56540/AT2G47000/AT2G24260/AT4G15290/AT5G60660/AT5G44610/AT5G58010/AT1G12950/AT1G01380	PIN3/AGP14/ABCB4/BHLH66/CSLB5/PIP2-4/PCAP2/BHLH82/DTX31/ETC1	10
BP	GO:0110096	cellular response to aldehyde	3/1144	11/23118	0.0147898	0.139402	AT1G77120/AT4G22110/AT5G42250	ADH1/-/-	3
BP	GO:1902475	L-alpha-amino acid transmembrane transport	3/1144	11/23118	0.0147898	0.139402	AT4G21120/AT2G39510/AT1G79900	CAT1/-/BAC2	3
BP	GO:0009692	ethylene metabolic process	5/1144	30/23118	0.0149418	0.139402	AT4G37770/AT4G08040/AT1G01480/AT1G73500/AT4G26200	ACS8/ACS11/ACS2/MKK9/ACS7	5
BP	GO:0009693	ethylene biosynthetic process	5/1144	30/23118	0.0149418	0.139402	AT4G37770/AT4G08040/AT1G01480/AT1G73500/AT4G26200	ACS8/ACS11/ACS2/MKK9/ACS7	5
BP	GO:0010268	brassinosteroid homeostasis	5/1144	30/23118	0.0149418	0.139402	AT3G30180/AT4G15393/AT5G36110/AT2G42850/AT4G15396	CYP85A2/CYP702A5/CYP716A1/CYP718/CYP702A6	5
BP	GO:0043449	cellular alkene metabolic process	5/1144	30/23118	0.0149418	0.139402	AT4G37770/AT4G08040/AT1G01480/AT1G73500/AT4G26200	ACS8/ACS11/ACS2/MKK9/ACS7	5
BP	GO:0043450	alkene biosynthetic process	5/1144	30/23118	0.0149418	0.139402	AT4G37770/AT4G08040/AT1G01480/AT1G73500/AT4G26200	ACS8/ACS11/ACS2/MKK9/ACS7	5
BP	GO:1900673	olefin metabolic process	5/1144	30/23118	0.0149418	0.139402	AT4G37770/AT4G08040/AT1G01480/AT1G73500/AT4G26200	ACS8/ACS11/ACS2/MKK9/ACS7	5
BP	GO:1900674	olefin biosynthetic process	5/1144	30/23118	0.0149418	0.139402	AT4G37770/AT4G08040/AT1G01480/AT1G73500/AT4G26200	ACS8/ACS11/ACS2/MKK9/ACS7	5
BP	GO:0009070	serine family amino acid biosynthetic process	7/1144	53/23118	0.0150691	0.139821	AT5G04120/AT3G13110/AT4G13890/AT4G21990/AT1G55920/AT4G29210/AT4G04610	IPSP/SAT3/SHM5/APR3/SAT1/GGT3/APR1	7
BP	GO:0046174	polyol catabolic process	4/1144	20/23118	0.0153123	0.141306	AT1G14520/AT1G47510/AT4G26260/AT3G02870	MIOX1/IP5P11/MIOX4/VTC4	4
BP	GO:0090627	plant epidermal cell differentiation	15/1144	163/23118	0.0154921	0.142192	AT1G70940/AT5G56540/AT4G26270/AT2G47000/AT2G24260/AT4G33880/AT4G15290/AT5G13080/AT5G60660/AT5G44610/AT5G58010/AT1G12950/AT1G01380/AT1G66470/AT5G51060	PIN3/AGP14/PFK3/ABCB4/BHLH66/BHLH85/CSLB5/WRKY75/PIP2-4/PCAP2/BHLH82/DTX31/ETC1/BHLH83/RBOHC	15
BP	GO:0009863	salicylic acid mediated signaling pathway	8/1144	66/23118	0.0158427	0.143855	AT1G44830/AT1G15380/AT1G28480/AT3G56400/AT3G50930/AT3G03450/AT3G52430/AT5G01900	ERF014/-/GRXC9/WRKY70/HSR4/RGL2/PAD4/WRKY62	8
BP	GO:0048767	root hair elongation	8/1144	66/23118	0.0158427	0.143855	AT1G70940/AT5G56540/AT2G47000/AT2G24260/AT4G15290/AT5G60660/AT5G44610/AT1G12950	PIN3/AGP14/ABCB4/BHLH66/CSLB5/PIP2-4/PCAP2/DTX31	8
BP	GO:0051187	cofactor catabolic process	13/1144	135/23118	0.0165158	0.149169	AT5G26220/AT3G49120/AT3G04060/AT2G37130/AT4G37520/AT5G15180/AT1G68850/AT2G35380/AT3G32980/AT4G29210/AT2G38390/AT5G64120/AT1G44970	GGCT2;1/PER34/anac046/PER21/PER50/PER56/PER11/PER20/PER32/GGT3/PER23/PER71/PER9	13
BP	GO:0010647	positive regulation of cell communication	12/1144	121/23118	0.0168133	0.151053	AT5G20150/AT2G45130/AT1G23140/AT3G56400/AT5G37740/AT1G73500/AT4G23450/AT3G52430/AT2G32510/AT1G70810/AT1G70800/AT1G52400	SPX1/SPX3/CAR8/WRKY70/-/MKK9/AIRP1/PAD4/MAPKKK17/CAR7/CAR6/BGLU18	12
BP	GO:0016125	sterol metabolic process	9/1144	80/23118	0.0171466	0.153224	AT3G30180/AT1G31910/AT4G15393/AT4G19230/AT5G36110/AT2G34500/AT2G42850/AT4G15396/AT5G24140	CYP85A2/PMK/CYP702A5/CYP707A1/CYP716A1/CYP710A1/CYP718/CYP702A6/SQP2	9
BP	GO:0006972	hyperosmotic response	8/1144	67/23118	0.0172355	0.153224	AT5G65010/AT5G59820/AT3G19580/AT1G48605/AT3G03450/AT2G43000/AT1G79900/AT5G46050	ASN2/ZAT12/AZF2/HAL3B/RGL2/JUB1/BAC2/NPF5.2	8
BP	GO:0046185	aldehyde catabolic process	4/1144	21/23118	0.0181903	0.160037	AT1G77120/AT1G11840/AT4G22110/AT5G42250	ADH1/ATGLX1/-/-	4
BP	GO:0051552	flavone metabolic process	4/1144	21/23118	0.0181903	0.160037	AT5G24530/AT5G63590/AT2G44450/AT2G47460	DMR6/FLS3/BGLU15/MYB12	4
BP	GO:0009624	response to nematode	9/1144	81/23118	0.0184716	0.161674	AT5G12860/AT5G27350/AT4G17490/AT4G17500/AT3G51860/AT4G39030/AT2G47800/AT1G73260/AT4G32650	DIT1/SFP1/ERF6/ERF1A/CAX3/DTX47/ABCC4/KTI1/KAT3	9
BP	GO:0009970	cellular response to sulfate starvation	3/1144	12/23118	0.0190049	0.162982	AT3G44320/AT3G55880/AT1G55920	NIT3/SUE4/SAT1	3
BP	GO:0010120	camalexin biosynthetic process	3/1144	12/23118	0.0190049	0.162982	AT1G73500/AT2G43000/AT3G52430	MKK9/JUB1/PAD4	3
BP	GO:0015807	L-amino acid transport	3/1144	12/23118	0.0190049	0.162982	AT4G21120/AT2G39510/AT1G79900	CAT1/-/BAC2	3
BP	GO:0052317	camalexin metabolic process	3/1144	12/23118	0.0190049	0.162982	AT1G73500/AT2G43000/AT3G52430	MKK9/JUB1/PAD4	3
BP	GO:1905392	plant organ morphogenesis	30/1144	406/23118	0.0192025	0.163849	AT1G70940/AT5G56320/AT5G56540/AT4G26270/AT2G47000/AT2G04025/AT2G17500/AT2G24260/AT1G68765/AT4G32810/AT4G33880/AT2G04160/AT4G15290/AT5G57620/AT5G13080/AT5G60660/AT3G30260/AT4G34600/AT2G30340/AT5G44610/AT4G20140/AT1G74500/AT5G58010/AT1G12950/AT1G01380/AT2G01830/AT1G13620/AT5G66870/AT1G66470/AT5G51060	PIN3/ATEXPA14/AGP14/PFK3/ABCB4/RGF3/PILS5/BHLH66/IDA/CCD8/BHLH85/AIR3/CSLB5/MYB36/WRKY75/PIP2-4/AGL79/CIF2/LBD13/PCAP2/GSO1/PRE3/BHLH82/DTX31/ETC1/AHK4/RGF2/LBD36/BHLH83/RBOHC	30
BP	GO:0009718	anthocyanin-containing compound biosynthetic process	5/1144	32/23118	0.0194719	0.165316	AT2G02990/AT5G13930/AT1G70000/AT2G43000/AT5G41315	RNS1/CHS/-/JUB1/GL3	5
BP	GO:0000097	sulfur amino acid biosynthetic process	7/1144	56/23118	0.0199723	0.167886	AT2G26400/AT3G22740/AT3G13110/AT4G21990/AT1G55920/AT4G29210/AT4G04610	ARD/HMT3/SAT3/APR3/SAT1/GGT3/APR1	7
BP	GO:0042538	hyperosmotic salinity response	7/1144	56/23118	0.0199723	0.167886	AT5G65010/AT5G59820/AT3G19580/AT1G48605/AT3G03450/AT2G43000/AT5G46050	ASN2/ZAT12/AZF2/HAL3B/RGL2/JUB1/NPF5.2	7
BP	GO:0018958	phenol-containing compound metabolic process	8/1144	69/23118	0.0202811	0.169642	AT3G48720/AT1G18870/AT5G24530/AT1G73805/AT2G37040/AT4G39030/AT3G52430/AT5G10300	-/ICS2/DMR6/SARD1/PAL1/DTX47/PAD4/HNL	8
BP	GO:0055081	anion homeostasis	6/1144	44/23118	0.0204973	0.17061	AT3G17790/AT3G47420/AT3G02040/AT1G30560/AT5G04340/AT3G51860	PAP17/ATPS3/GDPD1/-/ZAT6/CAX3	6
BP	GO:0008652	cellular amino acid biosynthetic process	19/1144	231/23118	0.0212374	0.174553	AT4G37770/AT5G04140/AT5G65010/AT4G08040/AT5G22630/AT3G44720/AT1G01480/AT2G26400/AT5G04120/AT3G22740/AT3G13110/AT4G13890/AT2G43000/AT4G21990/AT1G55920/AT4G29210/AT1G79900/AT4G26200/AT4G04610	ACS8/GLU1/ASN2/ACS11/ADT5/ADT4/ACS2/ARD/IPSP/HMT3/SAT3/SHM5/JUB1/APR3/SAT1/GGT3/BAC2/ACS7/APR1	19
BP	GO:0006558	L-phenylalanine metabolic process	4/1144	22/23118	0.0213822	0.174553	AT5G22630/AT3G44720/AT2G37040/AT3G10340	ADT5/ADT4/PAL1/PAL4	4
BP	GO:0009695	jasmonic acid biosynthetic process	4/1144	22/23118	0.0213822	0.174553	AT1G76690/AT1G20510/AT3G25780/AT2G06050	OPR2/4CLL5/AOC3/OPR3	4
BP	GO:1902221	erythrose 4-phosphate/phosphoenolpyruvate family amino acid metabolic process	4/1144	22/23118	0.0213822	0.174553	AT5G22630/AT3G44720/AT2G37040/AT3G10340	ADT5/ADT4/PAL1/PAL4	4
BP	GO:0044036	cell wall macromolecule metabolic process	16/1144	185/23118	0.021646	0.175573	AT3G23730/AT4G14130/AT1G10550/AT2G28110/AT3G47540/AT5G60950/AT3G12500/AT3G44990/AT1G02310/AT2G15390/AT5G41040/AT1G56550/AT4G33330/AT2G15370/AT5G67210/AT5G48070	XTH16/XTH15/XTH33/IRX7/-/COBL5/CHI-B/XTH31/MAN1/FUT4/HHT1/RGXT3/PGSIP3/FUT5/IRX15-L/XTH20	16
BP	GO:0042744	hydrogen peroxide catabolic process	10/1144	97/23118	0.021714	0.175573	AT3G49120/AT2G37130/AT4G37520/AT5G15180/AT1G68850/AT2G35380/AT3G32980/AT2G38390/AT5G64120/AT1G44970	PER34/PER21/PER50/PER56/PER11/PER20/PER32/PER23/PER71/PER9	10
BP	GO:0016132	brassinosteroid biosynthetic process	5/1144	33/23118	0.0220405	0.177368	AT3G30180/AT4G15393/AT5G36110/AT2G42850/AT4G15396	CYP85A2/CYP702A5/CYP716A1/CYP718/CYP702A6	5
BP	GO:0009738	abscisic acid-activated signaling pathway	22/1144	281/23118	0.0231824	0.178916	AT1G23140/AT1G08650/AT3G19580/AT4G32870/AT1G15380/AT5G37740/AT5G58670/AT1G18100/AT1G62660/AT4G23450/AT3G04530/AT5G01550/AT2G17890/AT2G32510/AT1G70810/AT1G70800/AT1G52400/AT2G38340/AT1G64060/AT1G67030/AT3G59220/AT5G10720	CAR8/PPCK1/AZF2/-/-/-/PLC1/MFT/BFRUCT3/AIRP1/PPCK2/LECRKA4.2/CPK16/MAPKKK17/CAR7/CAR6/BGLU18/DREB2E/RBOHF/ZFP6/PRN1/AHK5	22
BP	GO:0035690	cellular response to drug	12/1144	127/23118	0.0236727	0.178916	AT1G44830/AT1G15380/AT1G28480/AT3G56400/AT2G33580/AT3G50930/AT3G03450/AT3G52430/AT5G12270/AT5G01900/AT5G03350/AT5G10720	ERF014/-/GRXC9/WRKY70/LYK5/HSR4/RGL2/PAD4/-/WRKY62/LLP/AHK5	12
BP	GO:0009746	response to hexose	8/1144	71/23118	0.0236906	0.178916	AT5G01820/AT1G19200/AT4G17670/AT5G20830/AT4G39795/AT3G22550/AT3G63210/AT5G57090	CIPK14/FLZ12/FLZ2/SUS1/FLZ7/FLZ8/MARD1/PIN2	8
BP	GO:0010411	xyloglucan metabolic process	7/1144	58/23118	0.0237999	0.178916	AT3G23730/AT4G14130/AT1G10550/AT3G44990/AT2G15390/AT2G15370/AT5G48070	XTH16/XTH15/XTH33/XTH31/FUT4/FUT5/XTH20	7
BP	GO:0005986	sucrose biosynthetic process	3/1144	13/23118	0.0238133	0.178916	AT4G10120/AT1G51420/AT3G54270	SPS4/ATSPP1/SPP3A	3
BP	GO:0009700	indole phytoalexin biosynthetic process	3/1144	13/23118	0.0238133	0.178916	AT1G73500/AT2G43000/AT3G52430	MKK9/JUB1/PAD4	3
BP	GO:0016094	polyprenol biosynthetic process	3/1144	13/23118	0.0238133	0.178916	AT5G58784/AT1G72590/AT2G23400	-/PPRD1/-	3
BP	GO:0019374	galactolipid metabolic process	3/1144	13/23118	0.0238133	0.178916	AT2G11810/AT3G05630/AT5G20410	MGD3/PLPZETA2/MGD2	3
BP	GO:0034330	cell junction organization	3/1144	13/23118	0.0238133	0.178916	AT5G15290/AT2G27370/AT5G06200	CASP5/CASP3/CASP4	3
BP	GO:0045216	cell-cell junction organization	3/1144	13/23118	0.0238133	0.178916	AT5G15290/AT2G27370/AT5G06200	CASP5/CASP3/CASP4	3
BP	GO:0046217	indole phytoalexin metabolic process	3/1144	13/23118	0.0238133	0.178916	AT1G73500/AT2G43000/AT3G52430	MKK9/JUB1/PAD4	3
BP	GO:0048766	root hair initiation	3/1144	13/23118	0.0238133	0.178916	AT1G70940/AT4G33880/AT1G66470	PIN3/BHLH85/BHLH83	3
BP	GO:0050665	hydrogen peroxide biosynthetic process	3/1144	13/23118	0.0238133	0.178916	AT4G23450/AT4G18360/AT1G64060	AIRP1/GLO5/RBOHF	3
BP	GO:0052314	phytoalexin metabolic process	3/1144	13/23118	0.0238133	0.178916	AT1G73500/AT2G43000/AT3G52430	MKK9/JUB1/PAD4	3
BP	GO:0052315	phytoalexin biosynthetic process	3/1144	13/23118	0.0238133	0.178916	AT1G73500/AT2G43000/AT3G52430	MKK9/JUB1/PAD4	3
BP	GO:0044264	cellular polysaccharide metabolic process	23/1144	299/23118	0.0247057	0.184803	AT3G23730/AT4G14130/AT1G10550/AT2G28110/AT5G60950/AT4G24000/AT3G27190/AT3G44990/AT4G02280/AT1G05610/AT1G02310/AT2G15390/AT5G41040/AT4G15290/AT1G56550/AT2G32610/AT4G15210/AT4G33330/AT2G15370/AT5G67210/AT5G48070/AT2G32620/AT5G44480	XTH16/XTH15/XTH33/IRX7/COBL5/CSLG2/UKL2/XTH31/SUS3/APS2/MAN1/FUT4/HHT1/CSLB5/RGXT3/CSLB1/BAM5/PGSIP3/FUT5/IRX15-L/XTH20/CSLB2/DUR	23
BP	GO:0072593	reactive oxygen species metabolic process	16/1144	189/23118	0.025817	0.191976	AT3G49120/AT2G37130/AT4G37520/AT5G15180/AT1G68850/AT2G35380/AT3G03450/AT4G23450/AT3G52430/AT3G32980/AT5G47910/AT4G18360/AT1G64060/AT2G38390/AT5G64120/AT1G44970	PER34/PER21/PER50/PER56/PER11/PER20/RGL2/AIRP1/PAD4/PER32/RBOHD/GLO5/RBOHF/PER23/PER71/PER9	16
BP	GO:0009312	oligosaccharide biosynthetic process	7/1144	59/23118	0.0258908	0.191976	AT4G10120/AT1G55740/AT2G43000/AT4G22590/AT1G51420/AT3G54270/AT1G35910	SPS4/RFS1/JUB1/TPPG/ATSPP1/SPP3A/TPPD	7
BP	GO:0009789	positive regulation of abscisic acid-activated signaling pathway	6/1144	47/23118	0.0275422	0.200024	AT1G23140/AT5G37740/AT4G23450/AT1G70810/AT1G70800/AT1G52400	CAR8/-/AIRP1/CAR7/CAR6/BGLU18	6
BP	GO:0010928	regulation of auxin mediated signaling pathway	6/1144	47/23118	0.0275422	0.200024	AT1G70940/AT2G47000/AT2G17500/AT1G02520/AT5G57090/AT4G37900	PIN3/ABCB4/PILS5/ABCB11/PIN2/GRDP2	6
BP	GO:1901421	positive regulation of response to alcohol	6/1144	47/23118	0.0275422	0.200024	AT1G23140/AT5G37740/AT4G23450/AT1G70810/AT1G70800/AT1G52400	CAR8/-/AIRP1/CAR7/CAR6/BGLU18	6
BP	GO:1905959	positive regulation of cellular response to alcohol	6/1144	47/23118	0.0275422	0.200024	AT1G23140/AT5G37740/AT4G23450/AT1G70810/AT1G70800/AT1G52400	CAR8/-/AIRP1/CAR7/CAR6/BGLU18	6
BP	GO:0046246	terpene biosynthetic process	5/1144	35/23118	0.0278129	0.200024	AT1G31950/AT3G14540/AT1G66020/AT4G20210/AT1G70080	-/TPS19/TPS26/TPS08/TPS06	5
BP	GO:1900376	regulation of secondary metabolite biosynthetic process	5/1144	35/23118	0.0278129	0.200024	AT3G27190/AT3G52430/AT2G30840/AT1G04770/AT5G48850	UKL2/PAD4/-/-/SDI1	5
BP	GO:1901605	alpha-amino acid metabolic process	26/1144	352/23118	0.0278633	0.200024	AT4G37770/AT5G04140/AT5G65010/AT5G12860/AT4G08040/AT5G38710/AT4G34180/AT5G22630/AT3G44720/AT1G01480/AT2G26400/AT5G04120/AT3G22740/AT3G13110/AT2G39030/AT2G37040/AT4G13890/AT2G43000/AT4G21990/AT1G66860/AT1G55920/AT4G29210/AT3G10340/AT1G79900/AT4G26200/AT4G04610	ACS8/GLU1/ASN2/DIT1/ACS11/POX2/CYCLASE1/ADT5/ADT4/ACS2/ARD/IPSP/HMT3/SAT3/NATA1/PAL1/SHM5/JUB1/APR3/-/SAT1/GGT3/PAL4/BAC2/ACS7/APR1	26
BP	GO:0010383	cell wall polysaccharide metabolic process	13/1144	145/23118	0.0279374	0.200024	AT3G23730/AT4G14130/AT1G10550/AT2G28110/AT5G60950/AT3G44990/AT2G15390/AT5G41040/AT1G56550/AT4G33330/AT2G15370/AT5G67210/AT5G48070	XTH16/XTH15/XTH33/IRX7/COBL5/XTH31/FUT4/HHT1/RGXT3/PGSIP3/FUT5/IRX15-L/XTH20	13
BP	GO:0009409	response to cold	31/1144	436/23118	0.0280363	0.200024	AT1G55490/AT5G01820/AT5G59820/AT1G77120/AT1G80820/AT3G08720/AT5G58670/AT4G15910/AT1G17190/AT1G56600/AT5G37500/AT3G16470/AT3G23250/AT5G58784/AT3G61190/AT3G50970/AT5G20830/AT5G47230/AT1G09560/AT1G35720/AT2G23400/AT3G02870/AT1G43160/AT1G55920/AT5G62165/AT3G50260/AT5G44610/AT5G10230/AT3G16460/AT1G48000/AT5G15960	CPN60B1/CIPK14/ZAT12/ADH1/CCR2/ATPK2/PLC1/ATDI21/GSTU26/GOLS2/GORK/JAL35/MYB15/-/BAP1/XERO2/SUS1/ERF5/GLP4/ANN1/-/VTC4/RAP2-6/SAT1/AGL42/ERF011/PCAP2/ANNAT7/JAL34/MYB112/KIN1	31
BP	GO:0016998	cell wall macromolecule catabolic process	4/1144	24/23118	0.0287367	0.203312	AT3G47540/AT3G12500/AT3G44990/AT1G02310	-/CHI-B/XTH31/MAN1	4
BP	GO:0031408	oxylipin biosynthetic process	4/1144	24/23118	0.0287367	0.203312	AT2G26560/AT1G76690/AT1G72520/AT2G06050	PLP2/OPR2/LOX4/OPR3	4
BP	GO:0015696	ammonium transport	3/1144	14/23118	0.0292153	0.20584	AT1G73220/AT5G47450/AT1G79900	OCT1/TIP2-3/BAC2	3
BP	GO:0008202	steroid metabolic process	10/1144	102/23118	0.029575	0.207514	AT3G30180/AT1G31910/AT4G15393/AT4G19230/AT5G36110/AT2G34500/AT2G42850/AT3G44326/AT4G15396/AT5G24140	CYP85A2/PMK/CYP702A5/CYP707A1/CYP716A1/CYP710A1/CYP718/-/CYP702A6/SQP2	10
BP	GO:0048584	positive regulation of response to stimulus	23/1144	305/23118	0.0301344	0.2102	AT5G20150/AT2G45130/AT1G23140/AT1G77120/AT1G73805/AT3G49120/AT1G67360/AT3G48450/AT3G56400/AT5G37740/AT1G73500/AT2G29460/AT4G23450/AT3G52430/AT1G10300/AT2G32510/AT1G70810/AT4G18360/AT1G70800/AT1G52400/AT5G48657/AT1G48000/AT3G13672	SPX1/SPX3/CAR8/ADH1/SARD1/PER34/-/-/WRKY70/-/MKK9/GSTU4/AIRP1/PAD4/-/MAPKKK17/CAR7/GLO5/CAR6/BGLU18/-/MYB112/-	23
BP	GO:0043562	cellular response to nitrogen levels	6/1144	48/23118	0.0302055	0.2102	AT3G05630/AT2G30540/AT5G27420/AT3G08860/AT5G45380/AT1G29290	PLPZETA2/GRXS9/ATL31/PYD4/DUR3/CEP14	6
BP	GO:0032103	positive regulation of response to external stimulus	5/1144	36/23118	0.0310262	0.214156	AT5G20150/AT2G45130/AT1G73805/AT3G52430/AT1G10300	SPX1/SPX3/SARD1/PAD4/-	5
BP	GO:0072348	sulfur compound transport	5/1144	36/23118	0.0310262	0.214156	AT3G12520/AT1G22150/AT5G09470/AT3G15990/AT2G01830	SULTR4;2/SULTR1;3/PUMP6/SULTR3;4/AHK4	5
BP	GO:0034284	response to monosaccharide	8/1144	75/23118	0.0316765	0.21776	AT5G01820/AT1G19200/AT4G17670/AT5G20830/AT4G39795/AT3G22550/AT3G63210/AT5G57090	CIPK14/FLZ12/FLZ2/SUS1/FLZ7/FLZ8/MARD1/PIN2	8
BP	GO:0098656	anion transmembrane transport	18/1144	226/23118	0.0322917	0.221094	AT5G12860/AT5G15240/AT4G21120/AT1G76430/AT4G05590/AT3G12520/AT5G09220/AT1G22150/AT2G39510/AT5G09470/AT1G69480/AT3G30725/AT3G23430/AT3G54700/AT3G27170/AT1G79900/AT3G15990/AT3G45710	DIT1/AVT1J/CAT1/PHT1-9/-/SULTR4;2/AAP2/SULTR1;3/-/PUMP6/PHO1-H10/GDU6/PHO1/PHT1-7/CLC-B/BAC2/SULTR3;4/NPF2.5	18
BP	GO:0006020	inositol metabolic process	4/1144	25/23118	0.0329098	0.221749	AT1G14520/AT4G33770/AT4G26260/AT3G02870	MIOX1/ITPK2/MIOX4/VTC4	4
BP	GO:0031407	oxylipin metabolic process	4/1144	25/23118	0.0329098	0.221749	AT2G26560/AT1G76690/AT1G72520/AT2G06050	PLP2/OPR2/LOX4/OPR3	4
BP	GO:0043069	negative regulation of programmed cell death	4/1144	25/23118	0.0329098	0.221749	AT3G06730/AT4G34180/AT5G47910/AT1G64060	CITRX/CYCLASE1/RBOHD/RBOHF	4
BP	GO:1902074	response to salt	4/1144	25/23118	0.0329098	0.221749	AT1G78850/AT1G17950/AT5G49620/AT3G45710	-/MYB52/AtMYB78/NPF2.5	4
BP	GO:0009743	response to carbohydrate	14/1144	164/23118	0.0333466	0.223805	AT5G04140/AT5G01820/AT1G77120/AT1G19200/AT4G17670/AT3G57540/AT5G20830/AT4G02280/AT4G39795/AT3G52430/AT3G22550/AT3G63210/AT5G57090/AT2G01830	GLU1/CIPK14/ADH1/FLZ12/FLZ2/REM4.1/SUS1/SUS3/FLZ7/PAD4/FLZ8/MARD1/PIN2/AHK4	14
BP	GO:0015849	organic acid transport	13/1144	149/23118	0.0338324	0.225284	AT5G12860/AT5G15240/AT4G21120/AT4G05590/AT5G09220/AT2G39510/AT5G09470/AT1G51340/AT3G30725/AT2G48130/AT2G40900/AT1G79900/AT1G01070	DIT1/AVT1J/CAT1/-/AAP2/-/PUMP6/DTX42/GDU6/-/-/BAC2/-	13
BP	GO:0046942	carboxylic acid transport	13/1144	149/23118	0.0338324	0.225284	AT5G12860/AT5G15240/AT4G21120/AT4G05590/AT5G09220/AT2G39510/AT5G09470/AT1G51340/AT3G30725/AT2G48130/AT2G40900/AT1G79900/AT1G01070	DIT1/AVT1J/CAT1/-/AAP2/-/PUMP6/DTX42/GDU6/-/-/BAC2/-	13
BP	GO:0002237	response to molecule of bacterial origin	5/1144	37/23118	0.0344627	0.225586	AT1G73805/AT3G50930/AT1G08320/AT1G73260/AT5G10720	SARD1/HSR4/TGA9/KTI1/AHK5	5
BP	GO:0016129	phytosteroid biosynthetic process	5/1144	37/23118	0.0344627	0.225586	AT3G30180/AT4G15393/AT5G36110/AT2G42850/AT4G15396	CYP85A2/CYP702A5/CYP716A1/CYP718/CYP702A6	5
BP	GO:0016131	brassinosteroid metabolic process	5/1144	37/23118	0.0344627	0.225586	AT3G30180/AT4G15393/AT5G36110/AT2G42850/AT4G15396	CYP85A2/CYP702A5/CYP716A1/CYP718/CYP702A6	5
BP	GO:2000070	regulation of response to water deprivation	5/1144	37/23118	0.0344627	0.225586	AT1G67360/AT4G05590/AT3G56400/AT1G48000/AT3G13672	-/-/WRKY70/MYB112/-	5
BP	GO:0006560	proline metabolic process	3/1144	15/23118	0.0352063	0.225586	AT5G38710/AT2G43000/AT1G79900	POX2/JUB1/BAC2	3
BP	GO:0010453	regulation of cell fate commitment	3/1144	15/23118	0.0352063	0.225586	AT1G79580/AT4G20140/AT1G01380	SMB/GSO1/ETC1	3
BP	GO:0015695	organic cation transport	3/1144	15/23118	0.0352063	0.225586	AT1G73220/AT5G47450/AT1G79900	OCT1/TIP2-3/BAC2	3
BP	GO:0016115	terpenoid catabolic process	3/1144	15/23118	0.0352063	0.225586	AT5G65640/AT4G32810/AT4G19230	BHLH93/CCD8/CYP707A1	3
BP	GO:0031540	regulation of anthocyanin biosynthetic process	3/1144	15/23118	0.0352063	0.225586	AT5G13930/AT1G70000/AT5G41315	CHS/-/GL3	3
BP	GO:1902584	positive regulation of response to water deprivation	3/1144	15/23118	0.0352063	0.225586	AT1G67360/AT1G48000/AT3G13672	-/MYB112/-	3
BP	GO:0072330	monocarboxylic acid biosynthetic process	25/1144	344/23118	0.0360776	0.2303	AT1G06080/AT4G37770/AT5G65010/AT2G15090/AT4G08040/AT1G18870/AT1G43800/AT1G73805/AT4G26270/AT1G01480/AT5G23190/AT2G37040/AT2G26560/AT4G39030/AT3G52430/AT1G76690/AT3G06460/AT1G20510/AT1G72520/AT3G44300/AT3G25780/AT2G06050/AT3G10340/AT4G26200/AT2G38010	ADS1/ACS8/ASN2/KCS8/ACS11/ICS2/S-ACP-DES6/SARD1/PFK3/ACS2/CYP86B1/PAL1/PLP2/DTX47/PAD4/OPR2/-/4CLL5/LOX4/NIT2/AOC3/OPR3/PAL4/ACS7/-	25
BP	GO:0034219	carbohydrate transmembrane transport	8/1144	77/23118	0.0362871	0.23077	AT4G02050/AT5G26340/AT5G27350/AT1G08920/AT3G05155/AT3G20460/AT3G05400/AT5G50790	STP7/STP13/SFP1/ESL1/-/-/SUGTL5/SWEET10	8
BP	GO:0009962	regulation of flavonoid biosynthetic process	4/1144	26/23118	0.0374178	0.237073	AT5G13930/AT1G70000/AT2G47460/AT5G41315	CHS/-/MYB12/GL3	4
BP	GO:0008643	carbohydrate transport	13/1144	152/23118	0.0388048	0.244946	AT3G47420/AT1G30560/AT4G02050/AT5G26340/AT5G27350/AT1G08920/AT4G15230/AT3G05155/AT3G20460/AT5G11230/AT1G53660/AT3G05400/AT5G50790	ATPS3/-/STP7/STP13/SFP1/ESL1/ABCG30/-/-/-/-/SUGTL5/SWEET10	13
BP	GO:0046686	response to cadmium ion	25/1144	348/23118	0.0404928	0.252681	AT1G45145/AT1G77120/AT3G44320/AT5G26220/AT3G53620/AT3G12500/AT1G62480/AT4G04460/AT4G23670/AT3G13110/AT3G23250/AT1G70000/AT5G20830/AT1G75280/AT1G11840/AT2G26560/AT1G35720/AT2G47190/AT5G11670/AT1G70170/AT3G44300/AT3G13782/AT1G48000/AT1G53680/AT5G44460	TRX5/ADH1/NIT3/GGCT2;1/PPA4/CHI-B/-/APA3/-/SAT3/MYB15/-/SUS1/-/ATGLX1/PLP2/ANN1/ATMYB2/NADP-ME2/2MMP/NIT2/NAP1;4/MYB112/GSTU28/CML43	25
BP	GO:0006865	amino acid transport	8/1144	79/23118	0.0413294	0.252681	AT5G15240/AT4G21120/AT5G09220/AT2G39510/AT3G30725/AT2G40900/AT1G79900/AT1G01070	AVT1J/CAT1/AAP2/-/GDU6/-/BAC2/-	8
BP	GO:0002238	response to molecule of fungal origin	3/1144	16/23118	0.0417777	0.252681	AT1G66700/AT1G73260/AT3G44860	PXMT1/KTI1/FAMT	3
BP	GO:0010555	response to mannitol	3/1144	16/23118	0.0417777	0.252681	AT3G57540/AT5G20830/AT4G02280	REM4.1/SUS1/SUS3	3
BP	GO:0016104	triterpenoid biosynthetic process	3/1144	16/23118	0.0417777	0.252681	AT3G45130/AT5G36150/AT5G48010	LAS1/PEN3/THAS1	3
BP	GO:0051262	protein tetramerization	3/1144	16/23118	0.0417777	0.252681	AT1G17710/AT1G73010/AT1G53310	-/PS2/PPC1	3
BP	GO:0010038	response to metal ion	33/1144	486/23118	0.041806	0.252681	AT1G45145/AT1G77120/AT1G71200/AT3G44320/AT5G26220/AT3G53620/AT2G26530/AT2G40370/AT3G12500/AT1G62480/AT4G04460/AT4G23670/AT3G13110/AT3G23250/AT1G70000/AT5G20830/AT1G51340/AT5G24770/AT3G51860/AT1G75280/AT1G11840/AT2G26560/AT1G35720/AT2G47190/AT5G11670/AT4G34600/AT1G70170/AT3G44300/AT5G44610/AT3G13782/AT1G48000/AT1G53680/AT5G44460	TRX5/ADH1/-/NIT3/GGCT2;1/PPA4/AR781/LAC5/CHI-B/-/APA3/-/SAT3/MYB15/-/SUS1/DTX42/VSP2/CAX3/-/ATGLX1/PLP2/ANN1/ATMYB2/NADP-ME2/CIF2/2MMP/NIT2/PCAP2/NAP1;4/MYB112/GSTU28/CML43	33
BP	GO:0010252	auxin homeostasis	5/1144	39/23118	0.0420176	0.252681	AT1G70940/AT2G17500/AT1G28130/AT5G57090/AT1G14120	PIN3/PILS5/GH3.17/PIN2/-	5
BP	GO:0042762	regulation of sulfur metabolic process	5/1144	39/23118	0.0420176	0.252681	AT1G67810/AT3G52430/AT2G30840/AT1G04770/AT5G48850	SUFE2/PAD4/-/-/SDI1	5
BP	GO:0006071	glycerol metabolic process	4/1144	27/23118	0.0422623	0.252681	AT3G02040/AT5G43300/AT5G41080/AT1G74210	GDPD1/GDPD3/GDPD2/GDPD5	4
BP	GO:0009833	plant-type primary cell wall biogenesis	4/1144	27/23118	0.0422623	0.252681	AT4G24000/AT4G15290/AT2G32610/AT2G32620	CSLG2/CSLB5/CSLB1/CSLB2	4
BP	GO:0019400	alditol metabolic process	4/1144	27/23118	0.0422623	0.252681	AT3G02040/AT5G43300/AT5G41080/AT1G74210	GDPD1/GDPD3/GDPD2/GDPD5	4
BP	GO:0019852	L-ascorbic acid metabolic process	4/1144	27/23118	0.0422623	0.252681	AT1G14520/AT4G26260/AT2G46740/AT3G02870	MIOX1/MIOX4/GULLO5/VTC4	4
BP	GO:0019853	L-ascorbic acid biosynthetic process	4/1144	27/23118	0.0422623	0.252681	AT1G14520/AT4G26260/AT2G46740/AT3G02870	MIOX1/MIOX4/GULLO5/VTC4	4
BP	GO:0035335	peptidyl-tyrosine dephosphorylation	4/1144	27/23118	0.0422623	0.252681	AT4G03960/AT1G05000/AT2G32960/AT3G02800	DSP4/-/DSP2/DSP3	4
BP	GO:0002376	immune system process	30/1144	437/23118	0.0447747	0.266763	AT1G55490/AT3G06730/AT1G44830/AT1G73805/AT3G49120/AT3G48450/AT5G27420/AT3G56400/AT5G09978/AT3G12500/AT2G33580/AT1G14780/AT2G35930/AT3G50930/AT2G26560/AT4G39030/AT3G52430/AT3G25882/AT5G03210/AT5G64905/AT3G16030/AT3G04720/AT5G50260/AT4G18360/AT1G64060/AT5G48657/AT5G35580/AT5G09980/AT5G03350/AT1G61360	CPN60B1/CITRX/ERF014/SARD1/PER34/-/ATL31/WRKY70/PEP7/CHI-B/LYK5/-/PUB23/HSR4/PLP2/DTX47/PAD4/NIMIN-2/-/PEP3/CES101/HEL/CEP1/GLO5/RBOHF/-/-/PEP4/LLP/-	30
BP	GO:0010410	hemicellulose metabolic process	10/1144	110/23118	0.0460214	0.272983	AT3G23730/AT4G14130/AT1G10550/AT2G28110/AT3G44990/AT2G15390/AT4G33330/AT2G15370/AT5G67210/AT5G48070	XTH16/XTH15/XTH33/IRX7/XTH31/FUT4/PGSIP3/FUT5/IRX15-L/XTH20	10
BP	GO:0009838	abscission	5/1144	40/23118	0.0461402	0.272983	AT1G68765/AT3G52430/AT5G62165/AT2G23630/AT2G44010	IDA/PAD4/AGL42/sks16/-	5
BP	GO:0033692	cellular polysaccharide biosynthetic process	15/1144	188/23118	0.0469606	0.276872	AT2G28110/AT5G60950/AT4G24000/AT3G27190/AT1G05610/AT2G15390/AT5G41040/AT4G15290/AT1G56550/AT2G32610/AT4G33330/AT2G15370/AT5G67210/AT2G32620/AT5G44480	IRX7/COBL5/CSLG2/UKL2/APS2/FUT4/HHT1/CSLB5/RGXT3/CSLB1/PGSIP3/FUT5/IRX15-L/CSLB2/DUR	15
BP	GO:0046434	organophosphate catabolic process	10/1144	111/23118	0.048438	0.284594	AT3G03530/AT3G05630/AT3G02040/AT5G43300/AT4G26270/AT1G47510/AT5G41080/AT3G02870/AT3G03520/AT1G30110	NPC4/PLPZETA2/GDPD1/GDPD3/PFK3/IP5P11/GDPD2/VTC4/NPC3/NUDT25	10
BP	GO:0080134	regulation of response to stress	28/1144	406/23118	0.0487662	0.285535	AT3G06730/AT1G80710/AT1G44830/AT5G20150/AT2G45130/AT4G03960/AT1G77120/AT5G24660/AT1G73805/AT2G31865/AT3G49120/AT1G67360/AT4G05590/AT3G48450/AT3G01080/AT3G56400/AT3G61190/AT2G29460/AT4G39030/AT1G19180/AT3G52430/AT3G25882/AT1G17380/AT1G10300/AT4G18360/AT5G48657/AT1G48000/AT3G13672	CITRX/DRS1/ERF014/SPX1/SPX3/DSP4/ADH1/LSU2/SARD1/PARG2/PER34/-/-/-/WRKY58/WRKY70/BAP1/GSTU4/DTX47/TIFY10A/PAD4/NIMIN-2/TIFY11A/-/GLO5/-/MYB112/-	28
BP	GO:0016128	phytosteroid metabolic process	5/1144	41/23118	0.0504948	0.29464	AT3G30180/AT4G15393/AT5G36110/AT2G42850/AT4G15396	CYP85A2/CYP702A5/CYP716A1/CYP718/CYP702A6	5
